# Supplementary material for: Dynamics and nanoscale organization of the postsynaptic endocytic zone at excitatory synapses
Source: eLife. 2022 Jan 24;11:e74387. doi: 10.7554/eLife.74387 (PMC8813055; doi:10.7554/eLife.74387)
Supplement: Figure 1—figure supplement 1—source data 1. [file elife-74387-fig1-figsupp1-data1.xlsx]

## Sheet: Figure 1-figure supplement 1C
	# CCSs
	0	1	2	3 ( or more)
Neuron 1	7.69231	61.5385	23.0769	7.69231
Neuron 2	20	50	30	0
Neuron 3	5.88235	88.2353	5.88235	0
Neuron 4	23.8095	61.9048	14.2857	0
Neuron 5	0	75	25	0
Neuron 6	0	69.2308	30.7692	0
