# Supplementary material for: Dynamics and nanoscale organization of the postsynaptic endocytic zone at excitatory synapses
Source: eLife. 2022 Jan 24;11:e74387. doi: 10.7554/eLife.74387 (PMC8813055; doi:10.7554/eLife.74387)
Supplement: Figure 1—source data 1. [file elife-74387-fig1-data1.xlsx]

## Sheet: Figure 1C
	# clathrin puncta	0	1	2	>3
		15.3846	61.5385	23.0769	0
		17.8571	57.1429	25	0
		31.5789	57.8947	5.26316	5.26316
		20	64	8	8
		7.14286	57.1429	14.2857	0
		17.8571	32.1429	14.2857	3.57143
		10	70	20	0
		39.1304	47.8261	8.69565	4.34783
		0	88.2353	5.88235	5.88235
		5	85	10	0
		38.0952	47.619	14.2857	0
		50	36.3636	13.6364	0

## Sheet: Figure 1D
	Length	Spine-width			Length	Shaft-width
	0.239	0.169			0.304	0.169
	0.239	0.169			0.844	0.358
	0.304	0.169			0.377	0.253
	0.422	0.187			0.778	0.477
	0.304	0.151			0.239	0.169
	0.696	0.422			0.778	0.477
	0.304	0.169			0.643	0.328
	0.422	0.294			0.477	0.338
	0.239	0.169			0.377	0.253
	0.377	0.169			0.422	0.302
	0.239	0.169			0.267	0.169
	0.239	0.169			0.239	0.169
	0.239	0.169			1.126	0.422
	0.377	0.239			0.304	0.151
	0.721	0.416			1.135	0.573
	0.54	0.302			0.239	0.169
					0.422	0.179
	0.239	0.169			0.267	0.084
	0.239	0.169			0.377	0.226
	0.454	0.253			0.239	0.169
	0.239	0.169			0.54	0.422
	0.239	0.169			0.358	0.179
	0.239	0.169			0.566	0.418
	0.597	0.453			0.304	0.169
					0.358	0.226
	0.358	0.226			0.377	0.169
	0.304	0.226			0.43	0.169
	0.492	0.253			0.348	0.169
	0.239	0.169			0.239	0.169
	0.54	0.307			0.17	0.108
	0.267	0.169			0.314	0.204
	0.358	0.253			0.194	0.161
	0.239	0.169			0.194	0.108
	0.422	0.226			0.17	0.152
	0.609	0.264			0.392	0.215
	0.377	0.169			0.496	0.217
	0.304	0.169			0.194	0.108
	0.609	0.491			0.194	0.108
	0.614	0.418			0.29	0.161
	0.239	0.169			0.222	0.161
	0.304	0.169			0.17	0.152
	0.304	0.169			0.194	0.108
	0.454	0.338			0.269	0.161
	0.43	0.328			0.314	0.161
	0.422	0.239			0.361	0.215
	0.377	0.253			0.241	0.161
	0.422	0.253			0.152	0.108
	0.304	0.169			0.241	0.161
	0.304	0.169			0.481	0.269
	0.239	0.169			0.152	0.108
	0.422	0.239			0.29	0.136
	0.304	0.169			0.194	0.108
	0.304	0.169			0.194	0.161
	0.267	0.169			0.152	0.108
	0.267	0.084			0.222	0.161
	0.358	0.179			0.241	0.161
	0.513	0.338			0.241	0.215
	0.304	0.169			0.194	0.108
	0.422	0.239			0.222	0.108
	0.239	0.169			0.327	0.215
	0.239	0.169			0.269	0.161
	0.377	0.253			0.194	0.152
	0.267	0.169			0.194	0.108
	0.239	0.169			0.269	0.19
	0.358	0.179			0.657	0.403
	0.304	0.169			0.314	0.204
	0.304	0.169			0.269	0.144
	0.609	0.338			0.228	0.161
					0.152	0.108
	0.34	0.161			0.17	0.108
	0.314	0.153			0.194	0.108
	0.614	0.38			0.194	0.161
	0.17	0.108			0.152	0.108
					0.388	0.228
	0.46	0.35			0.29	0.161
	0.194	0.108			0.194	0.108
	0.241	0.161			1.135	0.536
	0.194	0.161			0.152	0.108
	0.228	0.161			0.17	0.108
	0.269	0.144			0.392	0.269
	0.29	0.161			0.392	0.211
	0.269	0.152			0.41	0.215
	0.194	0.108			0.241	0.161
	0.269	0.215			0.241	0.161
	0.152	0.108			0.269	0.161
	0.496	0.323			0.314	0.144
	0.222	0.161			0.34	0.215
	0.194	0.152			0.194	0.108
	0.194	0.108			0.345	0.168
	0.194	0.144			0.194	0.108
	0.241	0.153			0.241	0.161
	0.241	0.215			0.361	0.168
	0.345	0.187			0.269	0.19
	0.274	0.161			0.241	0.108
	0.194	0.144			0.42	0.323
	0.152	0.108			0.269	0.152
	0.194	0.161			0.29	0.161
	0.228	0.152			0.222	0.161
	0.269	0.19			0.207	0.115
	0.496	0.323			0.181	0.115
	0.29	0.228			0.207	0.115
	0.34	0.161			0.256	0.229
	0.345	0.196			0.486	0.243
	0.314	0.19			0.641	0.512
	0.41	0.313			0.256	0.172
	0.269	0.161			0.541	0.315
	0.361	0.228			0.568	0.366
	0.241	0.161			0.162	0.115
	0.345	0.152			0.287	0.172
	0.194	0.108			0.207	0.115
	0.463	0.217			0.309	0.115
	0.314	0.19			0.256	0.172
	0.194	0.144			0.207	0.115
	0.17	0.108			0.207	0.115
	0.614	0.269			0.309	0.163
	0.194	0.108			0.207	0.115
	0.194	0.108			0.256	0.115
	0.194	0.108			0.256	0.162
	0.388	0.265			0.309	0.172
	0.554	0.377			0.162	0.115
	0.269	0.179			0.243	0.172
	0.314	0.136			0.207	0.115
	0.448	0.398			0.287	0.172
	0.309	0.229			0.309	0.229
	0.256	0.172			0.363	0.229
	0.367	0.222			0.309	0.172
	0.334	0.127			0.181	0.115
	0.529	0.229			0.162	0.115
	0.486	0.203			0.334	0.191
	0.207	0.115			0.207	0.162
	0.287	0.203			0.256	0.115
	0.287	0.199			0.25	0.122
	0.486	0.284			0.456	0.352
	0.236	0.172			0.442	0.217
	0.669	0.453			0.228	0.192
	0.243	0.172			0.315	0.195
	0.493	0.25			0.21	0.117
	0.49	0.337			0.21	0.156
	0.207	0.115			0.221	0.148
	0.162	0.115			0.228	0.156
	0.493	0.27			0.457	0.184
	0.385	0.229			0.36	0.207
	0.309	0.115			0.315	0.195
	0.207	0.115			0.228	0.14
	0.236	0.172			0.21	0.156
	0.529	0.278			0.285	0.195
	0.207	0.115			0.175	0.138
	0.334	0.229			0.332	0.193
	0.243	0.172			0.315	0.117
	0.207	0.115			0.21	0.14
	0.162	0.115			0.21	0.14
	0.256	0.172			0.637	0.388
	0.334	0.229			0.232	0.191
	0.236	0.172			0.182	0.125
	0.256	0.115			0.318	0.218
	0.287	0.205			0.259	0.193
	0.228	0.156			0.187	0.136
	0.285	0.195			0.251	0.159
	0.195	0.117			0.274	0.225
	0.175	0.117			0.303	0.222
	0.282	0.117			0.618	0.385
	0.51	0.31			0.245	0.096
	0.262	0.166			0.182	0.128
	0.336	0.234			0.437	0.273
	0.494	0.173			0.251	0.155
	0.199	0.156			0.234	0.161
	0.25	0.184			0.215	0.158
	0.421	0.195			0.203	0.172
	0.25	0.166			0.232	0.159
	0.195	0.136			0.245	0.193
	0.228	0.156			0.234	0.129
	0.305	0.215			0.374	0.254
	0.315	0.225			0.331	0.201
	0.21	0.156			0.276	0.193
	0.228	0.13			0.187	0.128
	0.25	0.136			0.251	0.155
	0.442	0.238			0.431	0.255
	0.334	0.274			0.579	0.272
	0.232	0.128			0.487	0.34
	0.392	0.292			0.445	0.242
	0.232	0.144			1.746	0.597
	0.173	0.151			0.385	0.177
	0.182	0.128			0.258	0.158
	0.232	0.114			0.275	0.209
	0.303	0.143			0.674	0.284
	0.173	0.096			0.23	0.171
	0.327	0.225			0.34	0.175
	0.215	0.159			0.344	0.171
	0.203	0.096			0.52	0.307
	0.321	0.176			0.576	0.465
	0.331	0.204			0.16	0.128
	0.428	0.257			0.444	0.305
	0.446	0.28			0.23	0.192
	0.397	0.202			0.214	0.128
	0.206	0.142			0.32	0.181
	0.186	0.113			0.233	0.128
	0.205	0.16			0.205	0.16
	0.488	0.414			0.275	0.181
	0.435	0.171			0.275	0.171
	0.373	0.249			0.275	0.136
	0.452	0.256			0.258	0.178
	0.295	0.128			0.334	0.264
	0.647	0.511			0.353	0.256
	0.346	0.171			1.078	0.488
	0.461	0.307			0.205	0.16
	0.186	0.128			0.472	0.329
	0.32	0.181			0.841	0.534
	0.214	0.128			0.181	0.155
	0.275	0.192			1.171	0.559
	0.258	0.136			0.363	0.248
	0.316	0.155			0.155	0.124
	0.64	0.373			0.176	0.124
	0.199	0.105			0.474	0.304
	0.267	0.149			0.236	0.177
	0.208	0.124			0.422	0.279
	0.176	0.118			0.542	0.264
	0.732	0.472			0.256	0.173
	0.776	0.437			0.363	0.263
	0.155	0.124			0.883	0.591
	0.566	0.407			0.47	0.329
	0.267	0.186			0.347	0.278
	0.181	0.147			0.559	0.32
	0.375	0.237			0.458	0.31
	0.224	0.147			0.25	0.136
	0.36	0.272			0.473	0.279
	0.17	0.126			0.199	0.11
	0.184	0.158			0.354	0.222
	0.634	0.329			0.637	0.413
	0.269	0.201			0.208	0.153
	0.291	0.221			0.307	0.224
	0.341	0.197			0.181	0.153
	0.23	0.155			1.059	0.353
	0.24	0.095			0.422	0.241
	0.17	0.126			0.219	0.143
	0.184	0.126			0.181	0.124
	0.343	0.283			0.52	0.262
	0.31	0.254			0.482	0.341
	0.196	0.145			0.236	0.155
	0.182	0.109			0.414	0.248
	0.162	0.109			0.202	0.155
	0.23	0.145			0.525	0.316
	0.233	0.145			0.212	0.126
	0.23	0.109			0.202	0.126
	0.196	0.145			0.24	0.18
	0.185	0.109			0.184	0.14
	0.37	0.218			0.24	0.209
	0.257	0.182			1.06	0.818
	0.449	0.305			0.499	0.378
	0.459	0.253			0.268	0.156
					0.36	0.284
					0.254	0.183
					0.612	0.284
					0.75	0.339
					0.381	0.245
					0.368	0.265
					0.17	0.126
					0.36	0.243
					0.221	0.109
					0.393	0.211
					0.406	0.321
					0.545	0.374
					0.262	0.161
					0.474	0.334
					0.567	0.335
					0.386	0.24
					0.374	0.128
					0.374	0.232
					0.425	0.218
					0.182	0.114
					0.162	0.109
					0.185	0.109
					0.343	0.227
					0.264	0.13
					0.437	0.361
					0.564	0.291
					0.489	0.299
					0.244	0.145
					0.31	0.218
					0.3	0.254
					0.182	0.145
					0.196	0.109
					0.335	0.179
					0.212	0.145
					0.374	0.218
					0.182	0.128
					0.619	0.257
					0.212	0.126
					0.414	0.254
					0.277	0.161
					0.262	0.154
					0.439	0.234
					0.182	0.128
					0.358	0.218
					0.212	0.179
					1.403	0.538
					0.31	0.21
					0.264	0.138
					0.293	0.218
					0.205	0.145
					0.425	0.229
					0.325	0.169
					0.257	0.145

## Sheet: Figure 1E
	Area	Spine-circularity
	0.021	1
	0.021	1
	0.028	0.668
	0.036	0.7485
	0.021	0.668
	0.142	0.6252
	0.028	0.668
	0.057	1
	0.021	1
	0.05	0.5
	0.028	1
	0.028	1
	0.021	1
	0.043	0.7485
	0.135	0.6252
	0.1	0.8009
	0.021	1
	0.028	1
	0.078	0.5995
	0.028	1
	0.028	1
	0.021	1
	0.1	1
	0.036	1
	0.028	1
	0.064	0.5995
	0.028	1
	0.057	0.8009
	0.028	0.668
	0.057	1
	0.021	1
	0.057	0.7485
	0.085	0.668
	0.043	0.5
	0.028	0.668
	0.171	1
	0.142	0.714
	0.021	1
	0.028	0.668
	0.036	0.668
	0.085	0.8009
	0.071	0.8009
	0.057	0.7485
	0.05	0.7485
	0.057	0.7485
	0.028	0.668
	0.036	0.668
	0.021	1
	0.05	1
	0.043	0.668
	0.028	0.668
	0.028	0.668
	0.021	0.332
	0.036	1
	0.078	0.668
	0.028	0.668
	0.05	0.7485
	0.028	1
	0.028	1
	0.064	0.7485
	0.028	0.668
	0.021	1
	0.028	1
	0.036	0.668
	0.028	0.668
	0.15	0.668
	0.029	0.4985
	0.026	0.5985
	0.122	0.728
	0.012	0.6708
	0.064	0.8747
	0.012	0.6708
	0.026	0.7488
	0.017	1
	0.026	1
	0.017	0.7488
	0.029	0.5985
	0.02	1
	0.014	0.6708
	0.038	1
	0.012	1
	0.078	0.6674
	0.02	0.7488
	0.017	1
	0.012	0.6708
	0.012	1
	0.017	0.7488
	0.032	1
	0.032	0.7993
	0.023	0.5985
	0.014	1
	0.012	1
	0.02	1
	0.02	1
	0.029	1
	0.081	0.8568
	0.041	1
	0.026	0.4985
	0.035	0.7993
	0.035	0.7993
	0.064	0.8568
	0.023	0.7488
	0.046	0.8328
	0.02	0.7488
	0.029	0.7993
	0.012	0.6708
	0.046	0.8568
	0.035	0.7993
	0.014	1
	0.012	0.6708
	0.104	0.4544
	0.017	0.6708
	0.014	0.6708
	0.012	0.6708
	0.032	0.8328
	0.113	0.7789
	0.017	1
	0.02	0.5985
	0.095	1
	0.046	0.7979
	0.03	0.7511
	0.043	0.7979
	0.023	0.5993
	0.076	0.4438
	0.039	1
	0.02	0.6686
	0.033	1
	0.03	1
	0.072	1
	0.023	0.7511
	0.131	0.801
	0.026	1
	0.079	0.7157
	0.105	0.7495
	0.02	0.6686
	0.013	1
	0.082	0.8579
	0.049	0.6657
	0.026	0.4007
	0.02	0.6686
	0.026	0.7511
	0.085	0.5562
	0.013	0.6686
	0.043	0.7979
	0.026	1
	0.02	0.6686
	0.013	1
	0.033	0.7511
	0.039	0.7979
	0.023	0.7511
	0.023	0.5022
	0.036	1
	0.017	0.8
	0.017	0.7117
	0.011	0.75
	0.011	0.75
	0.015	0.8333
	0.07	0.7697
	0.018	0.8333
	0.035	0.854
	0.035	0.4158
	0.012	0.8
	0.024	0.8333
	0.029	0.4987
	0.023	1
	0.012	1
	0.018	0.8
	0.027	0.854
	0.032	1
	0.015	0.8
	0.011	0.8
	0.014	0.8
	0.046	0.8892
	0.044	0.8754
	0.01	0.6632
	0.045	1
	0.015	1
	0.011	1
	0.015	1
	0.012	0.8342
	0.021	0.751
	0.01	0.5963
	0.036	0.7009
	0.015	1
	0.01	0.4974
	0.029	1
	0.034	0.7785
	0.053	0.6163
	0.064	0.9169
	0.037	0.5844
	0.011	1
	0.01	0.8
	0.012	1
	0.083	1
	0.025	0.7293
	0.04	0.9
	0.064	0.5727
	0.021	0.4444
	0.192	0.8418
	0.021	0.7778
	0.061	0.8355
	0.012	0.8
	0.028	1
	0.015	0.6667
	0.032	0.75
	0.019	0.8571
	0.029	0.5
	0.136	0.7881
	0.011	0.8
	0.019	0.75
	0.016	0.6667
	0.012	0.8
	0.182	0.8949
	0.144	0.8574
	0.012	1
	0.07	0.7764
	0.034	0.75
	0.013	1
	0.045	0.7273
	0.011	0.8333
	0.047	0.8184
	0.013	0.7975
	0.018	1
	0.087	0.5499
	0.029	0.877
	0.035	0.7782
	0.036	0.8873
	0.02	0.7149
	0.019	0.4299
	0.012	0.7975
	0.011	0.7975
	0.045	1
	0.051	0.8729
	0.017	0.7967
	0.011	0.7517
	0.011	0.7517
	0.015	0.6651
	0.021	0.7967
	0.017	0.5
	0.015	0.7967
	0.011	0.5989
	0.046	0.6006
	0.033	0.8349
	0.07	0.75
	0.069	0.6674
	0.028
	0.15
	0.057
	0.185
	0.021
	0.128
	0.085
	0.078
	0.05
	0.078
	0.028
	0.028
	0.221
	0.021
	0.278
	0.021
	0.036
	0.021
	0.043
	0.021
	0.1
	0.028
	0.121
	0.036
	0.043
	0.036
	0.05
	0.036
	0.021
	0.012
	0.032
	0.02
	0.012
	0.014
	0.043
	0.046
	0.017
	0.014
	0.026
	0.02
	0.014
	0.017
	0.023
	0.032
	0.043
	0.026
	0.012
	0.023
	0.067
	0.012
	0.023
	0.017
	0.02
	0.012
	0.023
	0.029
	0.032
	0.014
	0.017
	0.038
	0.029
	0.017
	0.012
	0.026
	0.122
	0.038
	0.02
	0.023
	0.012
	0.012
	0.012
	0.014
	0.012
	0.052
	0.026
	0.014
	0.237
	0.012
	0.012
	0.058
	0.038
	0.052
	0.02
	0.023
	0.029
	0.02
	0.052
	0.012
	0.029
	0.017
	0.02
	0.029
	0.029
	0.02
	0.067
	0.023
	0.029
	0.017
	0.016
	0.013
	0.016
	0.033
	0.062
	0.151
	0.02
	0.089
	0.099
	0.013
	0.036
	0.013
	0.03
	0.03
	0.016
	0.013
	0.03
	0.016
	0.026
	0.023
	0.03
	0.013
	0.023
	0.013
	0.03
	0.043
	0.043
	0.036
	0.013
	0.013
	0.026
	0.02
	0.023
	0.012
	0.066
	0.043
	0.017
	0.034
	0.011
	0.012
	0.018
	0.015
	0.046
	0.026
	0.032
	0.015
	0.014
	0.029
	0.011
	0.024
	0.017
	0.014
	0.014
	0.109
	0.018
	0.01
	0.037
	0.031
	0.011
	0.014
	0.019
	0.033
	0.096
	0.011
	0.01
	0.049
	0.011
	0.019
	0.014
	0.016
	0.019
	0.02
	0.015
	0.043
	0.03
	0.022
	0.011
	0.019
	0.057
	0.084
	0.089
	0.057
	0.41
	0.038
	0.023
	0.03
	0.092
	0.018
	0.031
	0.029
	0.082
	0.141
	0.012
	0.072
	0.021
	0.015
	0.03
	0.015
	0.016
	0.018
	0.03
	0.017
	0.018
	0.032
	0.041
	0.17
	0.016
	0.083
	0.229
	0.017
	0.304
	0.048
	0.011
	0.013
	0.051
	0.02
	0.062
	0.069
	0.026
	0.059
	0.197
	0.081
	0.047
	0.104
	0.07
	0.016
	0.08
	0.011
	0.041
	0.138
	0.018
	0.038
	0.014
	0.187
	0.053
	0.016
	0.017
	0.066
	0.09
	0.022
	0.054
	0.015
	0.078
	0.013
	0.011
	0.021
	0.013
	0.024
	0.43
	0.104
	0.02
	0.058
	0.023
	0.103
	0.123
	0.05
	0.056
	0.014
	0.043
	0.013
	0.032
	0.074
	0.095
	0.02
	0.082
	0.102
	0.044
	0.024
	0.051
	0.04
	0.012
	0.011
	0.011
	0.041
	0.018
	0.065
	0.067
	0.04
	0.016
	0.03
	0.034
	0.013
	0.012
	0.022
	0.02
	0.048
	0.011
	0.078
	0.015
	0.045
	0.022
	0.016
	0.051
	0.012
	0.045
	0.011
	0.369
	0.032
	0.018
	0.026
	0.013
	0.044
	0.025
	0.021
