# Supplementary material for: Dynamics and nanoscale organization of the postsynaptic endocytic zone at excitatory synapses
Source: eLife. 2022 Jan 24;11:e74387. doi: 10.7554/eLife.74387 (PMC8813055; doi:10.7554/eLife.74387)
Supplement: Figure 2—source data 1. [file elife-74387-fig2-data1.xlsx]

## Sheet: Figure 2D
		Coefficient of variance
		Spine	Shaft
		0.008489	0.0506421
		0.012357	0.0340014
		0.0156059	0.0592527
		0.0257802	0.0520937
		0.0219848	0.0506926
		0.0237053	0.103734
		0.0194236	0.0711647
		0.0114218	0.0496589
		0.0208533	0.0389058
		0.0182363	0.07826
		0.0214292	0.0438674
		0.037468	0.118542
		0.029952	0.084307
		0.063217	0.125074
		0.031966	0.162052
		0.015507	0.103617
		0.042324	0.099498
		0.029627	0.129158
		0.037717	0.058194
		0.017134	0.044857
		0.020193	0.075873
		0.025155	0.062848
		0.026021	0.096742
		0.01463	0.05535
		0.023167	0.093094
		0.041368	0.047973
		0.023075	0.03681
		0.018826	0.034956
		0.014961	0.028036
		0.01675	0.032759
		0.018468	0.078925
		0.015273	0.060411
		0.013114	0.053799
		0.013545	0.030534
		0.011586	0.02477
		0.012479	0.062528
		0.019238	0.039006
		0.032388	0.034807
		0.016631	0.045513
		0.015444	0.071043
		0.025394	0.031068
		0.018347	0.021643
		0.022919	0.030746
		0.020103	0.049058
		0.03475	0.026841
		0.023293	0.067778
		0.029192	0.017961
		0.029434

## Sheet: Figure 2E
	RAW data					Histogram data
	Spine	Shaft				Bin center	Spine	Shaft
	40	23				0	0.191489	0.326398
	5	40				5	0.141844	0.269181
	40	4				10	0.106383	0.0780234
	6	18				15	0.0638298	0.053316
	40	6				20	0.070922	0.0455137
	40	2				25	0.035461	0.0364109
	40	22				30	0.035461	0.0156047
	5	4				35	0.0283688	0.023407
	11	1				40	0.326241	0.152146
	40	40
	37	19
	40	40
	9	40
	40	40
	18	6
	1	10
	30	40
	5	6
	28	40
	1	12
	8	10
	1	40
	25	12
	19	40
	2	40
	15	40
	2	40
	5	20
		14
	25	6
	40	40
	40	19
	9	6
	40	37
	40	18
	1	3
	40	11
	40	18
	8	1
	2	1
	2	3
	6	2
	8	1
	1	1
	1	1
	12	1
	13	30
	12	2
	1	29
	5	1
	6	3
		1
	16	2
	40	2
	10	26
	40	5
	1	1
	6	5
	24	1
	1	21
	13	8
		20
	2	3
	8	2
	40	10
	40	6
	40	3
	16	1
	40	18
	9	7
	3	6
	40	4
	7	14
	1	5
	11	1
	28	13
	3	13
	6	11
	14	1
	40	4
	36	12
	40	1
	40	2
	20	3
	40	1
	16	7
	40	10
	10	3
	21	7
	20	5
	40	7
	21	3
	40	6
	37	1
	1	1
	40	1
	40	3
	40	1
	40	1
	2	1
	2	2
	4	1
	1
	4	40
	23	40
	19	40
	19	40
	40	40
	13	40
	13	40
	40	4
	40	39
	8	40
	12	40
	40	25
	18	40
	32	18
	40	40
	40	39
	40	40
	40	30
	40	30
	40	40
	33	40
	40	40
	1	2
	40	3
	2	40
	40	1
	2	40
	5	40
	3	40
	40	40
	6	40
	28	40
	4	40
	3	2
	1	1
	1	5
	2	23
	1	21
	24	5
	1	34
	20	2
		35
		3
		6
		1
		6
		1
		5
		1
		1
		1
		2
		14
		17
		12
		8
		6
		11
		7
		2
		3
		5
		6
		4
		1
		1
		4
		4
		3
		1
		1
		1
		40
		4
		4
		40
		40
		3
		40
		27
		40
		40
		38
		40
		40
		40
		40
		40
		8
		1
		36
		3
		1
		1
		1
		3
		1
		2
		7
		1
		11
		26
		1
		1
		5
		8
		1
		3
		4
		2
		1
		15
		13
		1
		6
		11
		2
		7
		2
		6
		5
		40
		40
		4
		40
		40
		1
		12
		26
		40
		40
		40
		3
		1
		38
		40
		40
		13
		2
		16
		6
		1
		8
		40
		13
		14
		4
		4
		14
		12
		14
		40
		23
		40
		38
		19
		9
		40
		2
		40
		5
		1
		40
		8
		8
		15
		4
		1
		1
		1
		3
		40
		8
		29
		3
		1
		1
		1
		1
		5
		2
		4
		1
		6
		5
		2
		2
		40
		2
		7
		23
		15
		4
		6
		10
		4
		4
		4
		2
		1
		2
		8
		23
		7
		2
		33
		36
		3
		1
		1
		3
		3
		2
		10
		22
		4
		1
		22
		3
		1
		36
		3
		29
		2
		2
		30
		1
		14
		1
		2
		1
		1
		1
		3
		14
		1
		2
		39
		38
		38
		6
		3
		37
		1
		7
		3
		13
		5
		11
		36
		11
		2
		2
		6
		6
		1
		1
		7
		1
		1
		3
		5
		1
		15
		1
		1
		2
		11
		1
		1
		5
		2
		27
		1
		2
		4
		27
		26
		2
		4
		1
		9
		1
		1
		9
		3
		2
		3
		2
		22
		21
		1
		6
		2
		8
		40
		16
		40
		13
		23
		40
		40
		35
		40
		40
		9
		3
		1
		12
		9
		7
		40
		6
		40
		37
		40
		40
		15
		20
		1
		40
		17
		8
		40
		14
		10
		6
		1
		8
		8
		5
		23
		40
		11
		5
		2
		28
		40
		40
		3
		37
		26
		23
		40
		40
		12
		1
		5
		7
		1
		4
		6
		2
		33
		15
		2
		1
		7
		40
		2
		3
		4
		40
		1
		1
		1
		6
		5
		4
		2
		2
		6
		1
		15
		3
		1
		1
		1
		1
		5
		9
		1
		13
		1
		1
		4
		40
		1
		23
		26
		1
		2
		1
		1
		2
		3
		40
		13
		3
		3
		2
		13
		1
		4
		1
		40
		1
		7
		19
		1
		4
		40
		1
		2
		1
		5
		2
		1
		5
		4
		1
		15
		2
		3
		18
		3
		3
		9
		9
		2
		1
		14
		5
		1
		9
		39
		6
		2
		7
		5
		2
		17
		2
		9
		1
		33
		2
		1
		33
		14
		2
		18
		2
		33
		1
		1
		10
		5
		32
		1
		4
		7
		2
		2
		8
		1
		8
		1
		1
		2
		6
		6
		4
		4
		4
		5
		14
		21
		2
		3
		5
		26
		1
		5
		25
		12
		3
		24
		2
		5
		1
		1
		14
		2
		10
		8
		3
		5
		8
		4
		2
		1
		1
		21
		21
		1
		2
		1
		8
		40
		40
		40
		27
		40
		40
		6
		15
		28
		40
		18
		40
		4
		4
		17
		40
		30
		35
		40
		10
		39
		2
		23
		5
		40
		14
		3
		40
		10
		40
		18
		9
		38
		40
		6
		1
		2
		4
		40
		2
		6
		40
		1
		5
		1
		1
		4
		40
		27
		18
		5
		1
		7
		2
		4
		7
		7
		5
		1
		1
		4
		2
		7
		2
		1
		2
		40
		1
		4
		1
		5
		1
		6
		2
		6
		1
		6
		1
		7
		1
		40
		4
		1
		1
		1
		6
		1
		1
		4
		20
		4
		6
		1
		1
		33
		13
		40
		1
		3
		3
		1
		3
		6
		2
		1
		1
		4
		6
		3
		3
		16
		4
		3
		1
		1
		2
		21
		6
		3
		2
		2
		7
		1
		1
		1
		6
		3
		2
		4
		29
		1
		1
		6
		1
		27
		26
		24
		1
		1
		1
		1
		6
		7
		2
		21
		8
		21
		22
		1
		4
		21
		1
		21
		6
		1
		4
		21
		9

## Sheet: Figure 2H
	Time (minutes)	EZ																																		Shaft
	-1.66	94.9349	98.7729	106.627	104.745	106.163	112.601	105.092	94.8381	98.6031	102.752	103.639	102.33	94.3451	102.771	125.688	100.4	139.478	92.0708	95.0486	96.9052	80.4145	91.9793	90.8945	68.591	80.0559	56.5791	68.1726	80.955	94.5698	96.8389		95.1137	103.957	108.296	70.2651	97.2358	111.236	90.9814	85.9665	93.7324	89.9763	97.3658	77.0676	85.3204	67.478
	-1.33	102.836	110.959	103.359	114.136	96.996	106.543	115.094	96.5306	107.607	106.309	104.01	100.489	102.828	98.9611	109.034	98.3884	93.9619	91.3785	103.168	106.153	79.6749	102.585	110.145	108.566	115.119	99.8445	119.247	107.919	122.313	89.033		102.028	98.3623	94.3196	99.5127	91.2004	103.363	105.655	89.2422	88.4183	103.922	106.963	118.881	109.234	116.859
	-1	98.2453	91.5489	97.9255	93.8877	102.025	96.0683	95.2205	104.773	101.697	102.352	102.628	108.985	98.3742	107.164	90.9217	93.7014	107.578	103.669	107.467	108.282	130.694	107.286	98.2818	118.873	78.4	115.428	117.698	86.1262	81.0997	98.0979		86.2875	100.167	102.485	88.4534	81.5197	98.2944	95.633	116.049	90.4686	102.552	103.701	114.937	108.492	106.514
	-0.66	101.365	94.2677	98.8674	102.121	94.185	88.6394	98.6954	99.76	95.3081	96.3097	101.18	104.293	109.795	98.7199	89.0062	132.943	100.279	107.25	88.6266	83.4829	81.6952	86.9369	103.13	108.946	103.261	95.9436	84.8103	103.911	96.6572	110.335		96.4458	102.079	89.2473	91.7541	99.5517	95.6039	98.6891	86.0816	87.5784	102.92	100.459	86.5763	106.284	102.845
	-0.33	102.59	105.589	94.033	86.9517	101.449	97.7163	87.8562	103.353	97.4779	93.5934	90.3701	86.2502	94.607	93.7509	85.3502	74.5672	58.7036	105.631	105.689	105.177	127.522	111.213	97.7181	95.4015	123.512	132.795	110.794	121.357	105.652	105.536		120.125	96.3901	107.185	150.015	130.492	91.5027	109.041	122.891	139.913	100.759	91.5973	103.127	90.8685	106.829
	0	0	0	0	0	0	0	0	0	0	0	0	0	0	0	0	0	0	0	0	0	0	0	0	0	0	0	0	0	0	0		0	0	0	0	0	0	0	0	0	0	0	0	0	0
	0.33	6.89332	9.94774	8.74776	9.25116	11.2146	5.86358	3.43159	11.99	4.61604	5.14163	4.37411	4.3584	12.2242	3.65525	12.3356	8.47551	4.3051	1.87273	10.8222	13.2827	6.80989	0.653511	3.24255	9.18285	6.61835	11.3021	3.11587	14.4325	3.37398	24.1315		17.0322	7.71975	23.054	14.9071	7.64105	8.51925	17.3639	47.2783	38.9375	36.6967	27.6395	30.4023	23.0561	29.9033
	0.66	8.59828	10.3124	9.12751	19.2602	14.7498	4.93034	3.39755	15.2121	4.0074	8.58359	7.02467	6.02392	16.7645	6.72615	6.44515	5.85275	0.342007	0.63274	7.79222	-5.10874	5.35103	1.22856	12.8505	12.6226	10.9063	10.9738	11.4706	17.9289	10.5677	44.6446		20.8038	11.4817	35.7793	21.3237	20.3475	16.1061	22.344	69.1191	48.156	65.2975	34.7415	40.9786	35.7729	35.1358
	1	9.11935	8.63919	10.5042	7.28845	16.2874	4.91852	2.13535	9.25285	6.53971	9.99918	7.78722	8.96062	23.8098	8.68971	7.91643	-2.58934	8.1554	4.65635	17.4394	5.10076	20.976	9.27258	11.6956	18.4171	17.474	10.8102	19.8312	6.9053	5.34739	42.8696		28.3306	14.9767	36.9434	17.8542	20.6613	21.7852	23.9284	57.1723	62.673	62.0857	36.4322	52.9356	43.037	47.6383
	1.33	12.7589	16.3234	10.9761	18.6421	21.621	5.44088	11.0859	16.9167	7.86415	10.0334	7.84127	7.86356	20.8801	10.0382	7.43354	4.05396	16.5337	0.0166219	8.18698	2.12132	-0.870246	6.22318	15.5768	29.6407	26.0834	15.7995	8.89117	11.1295	10.7324	28.6347		29.3414	14.1926	32.844	26.8735	16.0016	21.3426	21.4142	58.6851	71.0418	72.0372	39.7925	64.7542	54.7955	60.7535
	1.66	12.5094	14.8698	9.68523	18.5054	21.1627	0.790657	5.6654	12.8964	6.70967	10.3304	8.1608	8.97712	18.1401	9.67459	7.25528	10.6333	19.1378	10.3455	18.1431	13.2608	27.5972	11.7393	7.8677	15.6235	25.5803	-3.07511	-12.5921	12.3232	13.3528	38.7394		29.2005	17.2829	34.8111	26.4911	17.2238	24.4483	22.9374	54.4839	69.2744	74.6036	51.6406	60.4932	80.2722	62.5662
	2	10.1451	7.43119	7.73061	15.6247	18.9056	9.54424	-1.46045	14.1044	8.99171	12.9504	7.34975	10.4358	16.0817	10.3857	2.82549	8.09552	11.4254	10.0319	20.3361	13.4324	12.8537	12.5248	13.409	53.453	45.5334	7.64451	7.71881	31.9065	18.2009	39.6549		28.4021	19.2114	34.0724	18.3472	28.5939	33.4508	37.8585	67.7434	83.9885	71.3827	61.069	51.6989	56.9798	62.3141
	2.33	14.6039	12.0124	8.67986	19.6378	17.716	8.09566	1.78807	14.6619	6.64248	13.8089	8.9317	11.7656	21.7051	11.8591	25.3868	15.5313	21.0016	14.3602	15.261	10.3272	36.2236	16.6162	8.42815	30.0865	36.0983	-1.21567	8.246	2.38947	17.4994	55.5408		26.4065	18.4902	31.818	25.088	34.3489	41.4327	45.7285	65.4605	40.9336	95.4156	50.1341	67.5776	56.6954	61.4247
	2.66	12.8861	11.0289	10.7433	23.2709	18.0418	12.4196	7.79973	18.1822	8.62086	17.8584	9.38769	10.0651	26.1186	12.3722	16.337	23.1628	29.2561	4.83808	10.0644	-3.86348	1.09555	14.9705	15.7596	36.0414	34.2227	21.0673	13.3995	13.5177	23.1546	60.1443		33.2715	20.1255	31.276	26.2195	41.6417	34.6503	49.5649	76.998	39.156	97.3987	54.3119	73.5866	48.3582	56.5485
	3	14.1659	12.5	15.2148	20.3221	18.6067	8.30849	6.47963	15.4137	10.2908	22.7455	11.1866	12.3664	31.411	13.8596	23.9076	38.1317	22.3841	18.1234	21.3751	16.4857	20.9338	13.896	14.3559	43.2622	20.7402	26.4913	11.5241	29.9505	15.5244	70.6527		28.6803	22.9345	39.6035	33.8766	51.8347	46.2182	44.8456	84.8241	42.2674	105.523	53.9303	70.5905	48.951	61.9931
	4	14.844	16.0904	14.4125	23.3204	19.4779	7.50805	6.36916	14.7091	10.0439	19.3849	10.8062	12.9703	28.9112	12.3767	22.5374	29.2848	30.1912	9.48889	11.9748	15.8072	7.05209	18.0151	18.1096	49.615	16.4649	36.2844	7.17308	20.7593	8.86256	65.1454		31.0926	24.461	38.5244	30.3618	41.3836	35.3378	39.1617	85.3354	38.288	104.359	47.6365	65.5696	48.3663	56.3823
	5	13.5259	12.3423	8.20859	17.9946	18.2895	10.1039	8.97032	18.3748	11.0992	23.7743	12.9714	15.6397	25.3607	18.1921	29.1475	45.535	40.1958	4.01142	20.0984	10.1177	17.2669	16.555	23.749	36.2987	28.0651	29.4067	30.6762	32.9961	29.567	77.7721		32.7928	35.0567	51.4095	41.5635	43.502	52.6462	42.3689	102.843	82.5673	72.4038	55.5078	57.3029	66.4781	109.951
	6	20.7691	14.9111	11.4966	28.5836	23.3209	11.4431	10.9718	24.8124	9.57054	24.7336	13.609	18.5143	34.1969	17.1395	41.3354	23.9342	38.8187	13.5923	11.3015	3.39651	26.8847	14.4959	27.4049	54.191	45.5868	5.15655	16.2144	36.275	58.7161	74.3158		36.6125	45.7792	64.1728	41.7466	58.6056	43.2417	54.8394	77.147	88.2282	87.4254	72.3968	94.0066	80.1881	69.556
	7	18.2346	10.7252	7.49313	21.9417	24.5851	10.4286	9.03993	14.2421	5.17342	23.1308	10.8572	20.0052	29.2837	21.4344	38.4288	20.0827	40.2522	15.8074	14.4833	14.3125	9.35585	14.2385	24.6848	46.7063	32.8713	1.93803	15.7132	28.0878	43.5313	58.2972		26.1795	42.3775	87.4599	33.569	58.6735	35.4611	47.207	73.4946	105.356	83.6795	66.3571	62.2318	60.163	80.8923
	8	22.1175	17.5331	12.0514	39.9053	34.0301	11.5164	15.6271	22.3872	8.43044	33.0087	16.1439	23.6405	39.7522	25.4179	48.741	18.2123	28.0973	18.5788	18.6263	16.2262	31.4443	22.2184	27.1672	49.0636	57.1838	10.8443	23.0401	50.2338	55.0559	101.248		46.8251	46.4345	62.2955	25.3686	66.6337	44.3015	48.2751	67.4963	88.8935	104.196	86.1767	89.9604	30.3281	89.316
	9	25.7512	17.827	10.0408	24.9252	32.8585	11.1751	12.1577	25.3323	7.89171	26.2749	11.7219	18.0782	38.1783	21.1815	68.3957	76.1727	43.5922	10.4031	12.532	6.27617	20.1565	20.5861	39.1846	38.6243	22.7487	-0.748673	11.7996	55.4798	47.1961	57.2879		33.9968	40.9094	53.3161	41.4819	64.7512	43.5243	43.1712	76.3192	119.472	90.2157	73.6597	71.3092	47.9575	85.1574
	10	24.421	24.1776	9.05982	26.9295	32.1111	8.85376	12.3852	26.0103	6.05923	29.7375	19.5787	24.9243	51.1225	30.7042	41.9101	118.15	34.3462	15.4484	14.8134	20.5587	35.3421	22.051	54.2136	66.8832	48.7438	-3.43165	30.2652	81.1561	46.7343	86.3734		42.9772	45.519	60.9661	45.572	91.4019	45.1153	59.1657	49.4838	104.686	93.3271	73.7668	72.4389	58.272	92.2747
	11	25.9132	26.8593	9.35779	34.2623	39.5139	7.93311	7.91442	26.5517	6.35207	27.9748	17.2216	23.6364	43.2505	24.7929	35.88	57.6788	29.4062	14.3026	20.9817	4.9451	13.1804	22.6576	35.3199	68.7079	61.4597	-5.3098	20.0119	60.9866	47.2248	126.314		43.4616	45.6562	94.1004	36.3895	74.7414	41.9214	58.8191	56.4021	127.642	88.0203	65.5782	68.1713	69.979	80.2475
	12	27.2589	28.9325	12.1247	27.9351	33.89	7.23421	9.4951	24.5673	5.94876	28.4131	18.8795	23.6877	48.0192	30.5853	37.926	13.9034	37.4179	20.815	32.7308	21.7501	28.9322	28.6942	45.3643	54.9151	91.2133	23.1066	39.6127	63.7112	61.4361	94.2992		46.0792	57.6198	115.177	41.9392	63.444	48.1125	57.8377	104.555	74.188	97.9516	51.5699	73.0168	60.4764	82.8864
	13	32.3621	21.3564	7.05602	29.4392	42.9351	8.35425	9.01331	22.768	2.62431	28.5858	15.1476	19.1634	46.3713	31.0044	25.1261	28.1925	27.2132	23.5355	25.7307	21.4607	31.1599	28.9478	28.0599	57.2244	82.8017	-5.4991	32.2278	66.5483	44.8886	73.0599		39.7219	50.9573	84.8613	28.5602	55.132	38.434	53.0563	58.4593	128.535	85.7	69.3313	81.5941	41.3578	84.3101
	14	30.2757	30.3332	8.70385	32.6855	39.2273	8.13802	8.95843	31.7871	6.29676	29.7025	21.734	26.7073	50.1326	36.0872	42.2759	37.3154	26.5028	23.5477	26.5823	19.8503	29.8137	19.7718	36.7051	42.1679	94.782	12.6311	20.8472	82.3003	46.0303	84.5275		47.5276	46.7789	73.3977	38.2724	45.1331	42.4275	61.6966	124.031	85.5531	100.897	76.646	67.2457	46.1489	86.0426
	15	27.969	27.7482	8.2061	24.83	37.6581	11.5554	6.57981	28.1571	4.40543	35.1371	22.839	29.5351	54.9462	36.3206	27.7095	28.12	23.8359	28.2461	21.2629	24.6616	42.0365	25.1099	55.0051	45.4343	69.0924	16.7631	38.0756	79.9009	54.0768	86.3465		44.1306	52.3298	67.3378	33.4626	41.9087	38.2744	57.4283	100.266	79.7667	97.1025	73.0632	65.8305	35.225	83.59
	17	36.7098	28.0595	9.88827	18.3578	36.5776	-0.471658	7.2976	33.166	6.29771	27.047	18.6776	19.4616	47.6921	29.6183	68.9372	28.8265	46.4201	22.2911	25.9221	15.2564	26.5777	23.6958	52.9105	71.3972	68.5809	38.8997	26.4391	56.5525	42.2823	116.304		50.5953	56.5973	68.7769	25.3933	42.5329	34.5853	59.3837	54.4632	123.007	144.051	90.3343	72.2207	81.8094	86.349
	19	41.8359	41.1694	7.88825	18.7141	49.5323	2.66217	7.93144	47.0627	10.6761	34.8372	20.6168	24.676	46.3748	37.5459	28.3493	25.8447	52.4634	22.5969	35.366	21.2571	18.8638	25.7022	30.4846	74.3166	84.9934	31.6344	28.1366	78.2054	55.6305	142.727		35.0505	53.3826	86.7885	30.9458	30.1504	31.9197	67.2369	101.545	116.186	165.82	90.1384	102.133	77.7838	73.312
