# Supplementary material for: Dynamics and nanoscale organization of the postsynaptic endocytic zone at excitatory synapses
Source: eLife. 2022 Jan 24;11:e74387. doi: 10.7554/eLife.74387 (PMC8813055; doi:10.7554/eLife.74387)
Supplement: Figure 3—source data 1. [file elife-74387-fig3-data1.xlsx]

## Sheet: Figure 3C
	RAW data				Histogram data
	Border-Center				Bin center	Frequency
	12.8466				-150	0
	-416.82				-100	0.047619
	0				-50	0.219048
	49.55				0	0.371429
	0				50	0.228571
	12.3606				100	0.0857143
	2.01923				150	0
	24.2395				200	0.0285714
	47.2857				250	0.0190476
	98.9354
	65.8808
	-27.7053
	-28.4741
	-52.1188
	9.33002
	48.8508
	6.92558
	-81.4364
	29.7281
	41.6145
	-14.3962
	59.212
	3.13554
	17.0706
	0
	-71.2763
	-69.0764
	-14.2046
	22.8712
	74.9313
	64.4585
	-41.3281
	-40.4706
	0.836179
	45.4848
	9.97373
	110.76
	1.6652
	60.2068
	123.858
	67.5094
	99.6035
	36.6546
	40.4579
	27.7755
	19.6165
	-112.567
	-46.9798
	54.5934
	3.32994
	-12.1782
	-54.692
	-66.0365
	17.9605
	-55.9034
	9.34155
	61.2792
	-35.9243
	10.3651
	57.388
	10.153
	72.0657
	74.6384
	-79.7585
	82.0324
	-0.04323
	-72.8867
	-5.65489
	22.0331
	23.2965
	-27.1868
	-204.165
	-60.1702
	-47.8044
	4.93107
	0
	29.8976
	16.3922
	25.8247
	-13.4228
	-17.865
	47.0484
	-9.77228
	-41.1265
	-5.14894
	-43.6507
	33.0132
	-27.1367
	-56.2348
	105.823
	-24.292
	-19.2381
	208.025
	-56.8761
	180.724
	240.741
	-14.3705
	89.6014
	114.623
	-8.65679
	-33.0006
	-109.812
	-35.1526
	195.441
	229.586
	110.158
	-75.9424

## Sheet: Figure 3D
	EZ_FWTM_Length	EZ_FWTM_Width
	221.841	171.768
	89.8033	78.2872
	178.942	123.836
	238.343	131.504
	196.858	135.485
	191.202	151.496
	275.231	145.732
	288.206	160.646
	193.608	141.359
	316.709	166.844
	215.387	158.874
	308.231	151.856
	229.216	143.272
	290.688	153.024
	356.208	167.844
	351.38	143.521
	257.84	142.804
	351.492	165.119
	314.618	129.491
	263.678	135.251
	232.541	122.251
	325.038	96.7651
	410.253	130.874
	278.453	146.62
	241.952	167.959
	281.846	197.439
	286.069	191.655
	344.576	182.286
	353.111	190.686
	323.107	227.075
	289.82	234.935
	243.744	174.207
	452.271	179.43
	288.283	199.543
	327.376	133.829
	312.539	148.066
	347.646	133.949
	268.341	162.937
	336.735	219.344
	252.198	162.183
	211.963	203.259
	223.271	177.096
	222.227	160.169
	339.268	219.652
	513.418	159.573
	343.366	172.338
	274.932	171.857
	146.38	115.602
	302.566	281.302
	275.165	189.155
	226.596	180.34
	298.501	179.883
	246.243	136.962
	334.15	231.942
	195.325	178.675
	255.79	156.1
	335.981	253.543
	228.22	182.278
	277.101	189.07
	281.546	193.048
	496.37	196.883
	164.185	112.19
	380.268	146.932
	432.207	222.223
	332.015	184.802
	193.021	166.254
	396.799	175.505
	90.7559	64.6863
	112.689	91.2973
	283.47	200.754
	228.794	95.1817
	103.418	85.3744
	151.394	135.019
	288.844	134.551
	188.807	112.705
	242.2	137.092
	300.504	185.057
	217.963	139.749
	275.646	153.439
	315.682	181.733
	415.97	212.345
	252.781	183.196
	184.769	170.389
	254.019	189.251
	314.48	157.037
	396.569	192.334
	224.552	167.514
	281.317	156.984
	82.3502	62.4484
	91.2573	89.0018
	111.753	64.9502
	102.781	68.0056
	74.6677	50.8614
	112.035	70.8843
	72.769	65.8424
	67.7393	47.9328
	93.8715	74.7004
	70.0821	55.9033
	81.3356	72.4624
	61.9068	53.8045
	94.173	69.0876
	84.6338	79.0567
	103.06	71.9902

## Sheet: Figure 3E
	Raw data				Histogram data
	Area micron				Bin center	Frequency
	0.037183				0	0.158879
	0.004544				0.01	0.0747664
	0.015818				0.02	0.0654206
	0.022702				0.03	0.149533
	0.018795				0.04	0.242991
	0.026708				0.05	0.149533
	0.040107				0.06	0.0747664
	0.041117				0.07	0.046729
	0.021128				0.08	0.0280374
	0.049168				0.09	0.00934579
	0.030214
	0.04729
	0.037818
	0.041682
	0.053722
	0.044552
	0.038067
	0.056016
	0.036551
	0.033854
	0.027089
	0.040735
	0.05214
	0.034897
	0.041198
	0.046515
	0.051275
	0.052558
	0.059911
	0.063557
	0.060207
	0.036793
	0.070657
	0.05247
	0.0322
	0.044003
	0.043345
	0.043563
	0.060493
	0.040096
	0.031243
	0.032066
	0.036043
	0.06806
	0.06881
	0.054743
	0.033434
	0.012075
	0.078154
	0.049192
	0.033206
	0.052305
	0.030384
	0.073756
	0.038629
	0.043393
	0.064977
	0.033849
	0.045294
	0.039172
	0.082326
	0.012767
	0.045529
	0.0867
	0.051543
	0.032215
	0.058337
	0.003912
	0.008916
	0.04244
	0.017155
	0.006492
	0.01822
	0.035196
	0.019848
	0.032477
	0.05284
	0.038174
	0.04251
	0.056087
	0.077602
	0.044832
	0.03599
	0.043251
	0.046324
	0.073806
	0.033132
	0.034294
	0.003476
	0.0054
	0.004565
	0.004516
	0.005169
	0.002448
	0.001714
	0.005631
	0.002193
	0.003419
	0.001856
	0.004461
	0.002206
	0.004207
	0.005575
