# Supplementary material for: Dynamics and nanoscale organization of the postsynaptic endocytic zone at excitatory synapses
Source: eLife. 2022 Jan 24;11:e74387. doi: 10.7554/eLife.74387 (PMC8813055; doi:10.7554/eLife.74387)
Supplement: Figure 4—figure supplement 1—source data 1. [file elife-74387-fig4-figsupp1-data1.xlsx]

## Sheet: Figure 4-figure supplement 1A
	Eps15 - KI	Eps15-OE		Itsn-KI	Itsn-OE		Dyn2-KI	Dyn2-OE
	64.5833	59		69.5652	83.9		73.6842	71
	61.2903	80.7		59.2593	39.5		91.6667	75
	54.5455	63.6		28	42.3		75	69
	62.963	66.7		52.5	33.3		100	71
	64.2857	72.7		51.6129	42.9		61.9048	89
	84.6154			56.25			64.2857
	63.1579			50			77.2727
	75			80
				61.9048
