# Supplementary material for: Dynamics and nanoscale organization of the postsynaptic endocytic zone at excitatory synapses
Source: eLife. 2022 Jan 24;11:e74387. doi: 10.7554/eLife.74387 (PMC8813055; doi:10.7554/eLife.74387)
Supplement: Figure 4—source data 1. [file elife-74387-fig4-data1.xlsx]

## Sheet: Figure 4C
	Clathrin	Synd1	Synd2	picalm	Eps15	FCHo	Itsn	Epsin	Amph	Dyn2	CPG2	B2-adaptin	Hip1R
	50	89	43	39	59	40	83.9	4.3	45	71	75	90.9091	86.0465
	95.3	68	37	39	80.7	35	39.5	26.3	30	75	58	75	93.1034
	89.5	83	50	54	63.6	32	42.3	34.6	72.4138	69	69	81.4815	75.8621
	78.6	56	75	31	66.7	0	33.3	0	26.4151	71	78	78.2609	97.3684
	46.9	43.2432	73	21	72.7	5	42.9	4.1	13.8889	89	77	93.5484	83.871
	44.4	32.3529		39		7.1		34.4	7.14286			88.8889	87.0968
	64.9	67.6471						42.8571					89.4737
	64.7							86					86.6667
								85.1852					64.7059
