# Supplementary material for: Dynamics and nanoscale organization of the postsynaptic endocytic zone at excitatory synapses
Source: eLife. 2022 Jan 24;11:e74387. doi: 10.7554/eLife.74387 (PMC8813055; doi:10.7554/eLife.74387)
Supplement: Figure 5—figure supplement 1—source data 1. [file elife-74387-fig5-figsupp1-data1.xlsx]

## Sheet: Figure 5-figure supplement 1A
	Time (mins)	B2-adaptin																Clathrin
	-1.66	104.754	79.4936	88.0175	100.163	97.4157	102.434		77.3208	85.6465	86.2029	81.4505	84.9489	71.0408	92.4699			95.1022	125.674	98.5086	126.588	122.954	131.633	121.822		104.805	96.8501	106.011	110.008	119.344		107.596	106.013	98.9533		116.677	104.172	112.357	102.127	96.1601	96.1392		95.6914	106.033	97.2682	94.1174		115.068	138.089
	-1.33	118.628	85.3094	97.8449	99.2451	108.311	109.035		111.38	106.638	114.965	99.792	76.8026	92.3336	97.5651			91.0544	98.1674	100.088	104.462	114.727	83.3232	103.434		89.9494	88.4924	92.6494	100.224	90.954		105.418	111.106	110.374		101.028	99.3093	101.982	98.4109	107.912	105.639		100.625	102.811	109.567	102.543		100.62	102.495
	-1	91.5105	119.87	96.5011	86.612	96.9945	99.9672		99.5081	115.216	96.3746	97.4483	104.825	121.71	114.583			105.632	84.7553	87.2069	92.9904	76.0043	94.4813	101.063		105.425	104.076	105.563	98.2213	97.695		97.1	99.7368	90.6675		99.6642	106.8	102.97	105.859	101.306	97.0308		97.5488	104.571	103.755	99.3845		91.5622	113.443
	-0.66	79.4778	101.156	96.0971	97.2558	97.2265	94.4324		113.474	84.3837	105.281	110.615	110.034	108.197	84.6506			114.017	111.735	115.115	104.432	106.275	116.232	97.1411		102.267	106.386	99.1248	104.106	96.5624		97.148	96.3135	93.3446		97.058	95.1555	103.542	101.877	100.474	105.46		102.588	95.7702	92.8583	103.479		119.04	87.5398
	-0.33	105.629	114.17	121.539	116.724	100.052	94.1318		98.3175	108.116	97.1767	110.694	123.389	106.719	110.732			94.8737	89.5806	100.044	82.0401	88.6744	86.8557	84.6549		98.8326	104.294	97.9641	89.1885	98.5279		93.9577	88.5669	107.93		88.6241	95.657	82.223	92.6741	94.3946	95.6293		102.652	92.6134	97.5022	99.7409		73.123	63.9076
	0	0	0	0	0	0	0		0	0	0	0	0	0	0			0	0	0	0	0	0	0		0	0	0	0	0		0	0	0		0	0	0	0	0	0		0	0	0	0		0	0
	0.33	4.58121	23.9645	22.3094	25.7932	50.3558	24.9884		53.7865	31.8092	32.8636	18.144	21.5016	10.4222	27.5106			14.1691	8.9638	3.48806	2.61941	5.32255	29.7756	19.2954		4.22203	14.5417	8.93942	1.5374	4.84174		8.59713	11.0662	10.6837		9.8979	5.21715	5.616	6.02586	7.5896	13.5235		28.7493	23.0288	40.4715	23.797		14.6335	3.53543
	0.66	16.2048	26.4774	42.1703	45.4144	50.3192	31.5208		47.7552	60.4136	40.8273	31.0081	26.0251	25.1103	39.6011			11.0593	9.80003	21.3841	11.4628	22.5849	64.6775	8.37525		2.89315	12.491	11.9441	0.964762	1.00608		9.93382	20.3093	11.0797		5.8689	7.26395	6.71719	4.89478	10.5031	18.8313		40.0388	36.1641	42.9771	19.855		13.3554	6.0819
	1	24.2816	42.985	38.18	55.701	49.7089	45.426		51.1967	53.3251	48.1956	29.7045	28.0617	48.3421	33.9174			0.934526	3.79028	7.60033	4.21998	4.97155	44.7198	7.35362		4.81284	6.87521	13.6557	4.09232	4.20814		13.683	8.90968	12.0002		9.93103	7.89265	9.00379	5.0814	9.23234	21.9574		30.3165	43.1903	40.1564	27.962		6.40256	13.7097
	1.33	27.7033	41.1122	49.7469	67.875	48.9154	35.8666		48.0333	68.9914	59.9964	37.8022	36.0318	40.2104	22.2641			13.6834	13.8429	18.6469	7.42222	10.0689	45.7668	20.262		5.75637	11.9784	15.5777	5.85497	2.77889		13.0811	10.418	14.5952		3.82407	9.82487	11.8771	6.34375	12.275	19.7786		49.2629	51.1567	46.1946	22.9743		5.99034	16.0705
	1.66	15.75	49.5839	54.1247	45.6524	43.9835	46.3279		56.8456	63.118	57.9124	31.5479	38.6167	23.0986	34.59			12.651	15.2013	28.2518	8.4211	15.16	53.4069	10.3757		6.83877	14.0488	14.0895	8.28635	2.6306		12.1372	16.3409	13.3783		7.16989	7.47482	12.5184	7.02366	5.69421	9.71983		53.619	69.4237	56.4588	33.7628		15.1159	26.0535
	2	25.0148	49.3115	66.7139	71.7686	42.3111	35.0876		60.2089	64.3809	58.9957	34.708	25.751	36.502	31.0251			-16.1002	26.4045	63.5804	14.9593	15.1587	67.7213	4.00115		8.34497	11.924	12.5799	2.36512	10.8207		9.19559	21.231	9.73695		0.892747	9.09579	15.0591	7.40255	8.6001	12.6704		47.1105	79.5811	59.506	39.8879		18.794	20.8502
	2.33	32.2106	42.985	45.7566	50.2431	45.7903	31.4866		63.4419	78.3674	67.1496	37.3545	32.7224	51.9536	24.2315			13.2527	12.4156	34.216	9.88983	22.5015	77.5	18.8123		6.00434	12.6734	15.7824	5.08731	7.69841		9.78313	18.6795	14.2078		7.43654	9.5129	15.6228	11.8279	7.39645	17.7015		35.9102	58.6555	48.2292	37.5228		16.6172	19.7349
	2.66	27.1519	51.6133	70.9021	76.7504	60.0974	35.7367		70.8724	74.281	79.4797	44.2276	52.8728	30.7698	50.111			21.8063	18.484	29.9123	9.71641	20.3163	51.0353	18.7261		5.72262	15.6107	12.5071	5.26256	8.65531		11.7883	13.4318	8.67324		5.77477	12.3942	12.4078	9.8117	8.48629	30.0809		52.948	51.6842	47.2506	30.9303		30.9085	35.3367
	3	25.6684	46.0904	81.9744	61.1589	42.4332	61.9482		69.9164	74.7218	68.357	60.0674	55.2227	30.382	55.0212			26.578	20.9197	17.1488	12.0874	12.0141	55.9871	13.2487		8.24807	12.2724	14.5344	4.26234	5.18517		17.1344	24.4046	12.9445		12.4688	13.4573	14.4193	10.8917	14.7686	27.4488		53.8425	42.1481	52.2041	35.262		35.4704	25.3415
	4	26.1402	42.2904	70.259	53.7457	29.9266	45.9384		68.7779	68.9199	64.8755	46.3343	40.007	22.8198	56.4169			41.4695	25.0732	14.6233	13.6778	12.4906	66.8906	20.8565		9.3924	14.8971	16.6573	6.57412	6.73509		15.5938	28.9258	15.6741		9.35794	11.836	15.2313	9.76828	13.8773	28.5089		81.9428	49.8358	61.2153	33.7149		44.3377	43.5896
	5	36.86	48.8689	93.0631	87.7172	56.8441	34.8963		64.8845	71.9936	61.8157	49.4944	44.8243	46.6697	27.4601			20.1066	21.6988	22.3889	22.0427	22.4514	91.4035	21.9695		8.63032	16.6158	17.0413	7.43095	7.86454		9.21791	20.1079	13.5574		8.336	16.9431	19.1329	9.75714	14.6185	22.0217		53.5521	62.5318	45.0458	27.8376		51.2067	48.0645
	6	37.2977	64.3413	91.3071	71.6326	65.1513	35.0534		79.3023	60.9259	64.3545	43.6088	23.6165	43.7854	34.8255			13.1322	44.0324	50.7645	32.7391	73.7452	108.141	17.2129		7.27962	21.0255	19.7868	10.2003	8.69751		12.1596	27.4194	15.4584		8.3211	14.9585	18.7083	10.6834	16.764	24.5809		128.365	85.5945	60.5246	57.3747		28.4759	39.9131
	7	35.0468	70.014	83.6562	65.0525	69.3629	33.4067		84.4385	61.1642	75.1546	39.5402	50.6599	17.6814	36.1707			10.4684	34.8163	26.2751	26.9744	54.9144	64.0675	16.8391		4.18613	16.243	19.6178	11.0003	9.32034		6.56982	22.5316	14.5404		17.86	20.8772	21.6447	12.6923	16.5295	30.0902		103.104	78.9479	60.922	52.7357		32.5914	41.332
	8	40.7989	64.0484	72.5345	66.7698	52.9988	44.4283		77.9118	84.5148	73.0707	40.7516	55.2227	34.4782	70.189			17.7418	66.7796	77.6946	36.4043	72.0367	136.677	33.9143		4.5332	19.4659	26.4137	9.22606	6.75393		12.1918	40.2556	17.8839		15.0471	23.2396	33.1067	14.9862	26.1208	37.4535		73.8753	79.7593	53.6299	37.438		35.6286	35.4197
	9	40.6511	61.7058	76.4506	68.9122	61.953	33.0924		81.223	80.488	66.5377	55.459	54.7723	47.2272	60.7554			15.9077	76.3737	30.3373	55.6311	66.6425	78.0289	42.6343		6.31494	24.6588	21.0942	9.98965	8.08905		9.66863	22.7293	17.0562		9.37357	20.8597	21.4264	10.2727	14.3611	34.4863		89.4527	92.4888	50.3489	44.5929		42.304	56.2491
	10	45.6984	46.8939	59.6072	41.0787	54.2561	40.5745		72.3672	82.7516	79.4549	57.4999	56.848	49.4934	50.296			10.6948	69.2471	38.2652	32.7725	49.8131	95.0859	41.3579		6.69258	27.2576	28.0533	11.9212	7.80309		9.18194	20.7713	23.2327		19.0173	31.1458	31.2766	16.2963	16.6401	58.1118		45.5152	59.2707	46.9025	44.6211		78.7854	40.8095
	11	40.276	55.495	80.1853	43.221	43.953	43.9022		69.7947	73.2803	77.098	41.0017	39.9483	43.4098	116.298			12.63	88.3386	100.745	42.9405	82.4618	185.437	37.9157		4.0636	24.5337	28.8874	6.09468	7.68535		5.39671	22.6173	24.4877		20.5073	24.0699	24.9209	14.5974	21.9671	49.2983		70.0361	56.5846	54.9204	61.3502		26.1887	46.7239
[truncated: 5 more columns]

## Sheet: Figure 5-figure supplement 1B
	Time (mins)	Eps15																												Clathrin
	-1.66	99.4276	95.895	97.9607		114.979	79.2267	94.5173	86.5032	104.102	118.792		78.5273	91.9256	85.3835	91.8891	99.8542		92.2828	87.7054	85.0751	92.255		102.716	84.941	85.813	93.6112	83.2989		95.1022	125.674	98.5086	126.588	122.954	131.633	121.822		104.805	96.8501	106.011	110.008	119.344		107.596	106.013	98.9533		116.677	104.172
	-1.33	96.9073	102.86	90.0478		96.7294	129.385	102.543	77.3388	96.4539	78.0093		88.8658	105.207	101.48	97.8608	104.949		110.583	109.663	112.747	121.98		104.727	116.594	109.952	109.709	99.0653		91.0544	98.1674	100.088	104.462	114.727	83.3232	103.434		89.9494	88.4924	92.6494	100.224	90.954		105.418	111.106	110.374		101.028	99.3093
	-1	97.2584	95.2948	93.222		110.395	104.453	98.6351	112.297	102.402	108.994		90.708	89.8623	106.74	122.737	88.4578		107.597	109.714	124.195	85.4989		110.953	120.671	110.356	99.0178	112.79		105.632	84.7553	87.2069	92.9904	76.0043	94.4813	101.063		105.425	104.076	105.563	98.2213	97.695		97.1	99.7368	90.6675		99.6642	106.8
	-0.66	105.999	105.841	103.245		86.0152	85.3366	88.4957	111.42	103.066	94.6144		123.426	107.739	103.558	102.47	100.906		106.279	93.2814	93.7777	90.5548		79.7032	97.2843	87.9797	88.9404	105.891		114.017	111.735	115.115	104.432	106.275	116.232	97.1411		102.267	106.386	99.1248	104.106	96.5624		97.148	96.3135	93.3446		97.058	95.1555
	-0.33	100.407	100.109	115.525		91.8814	101.598	115.809	112.441	93.9756	99.5903		118.472	105.266	102.839	85.0436	105.833		83.2572	99.6372	84.2056	109.711		101.901	80.5103	105.899	108.722	98.9546		94.8737	89.5806	100.044	82.0401	88.6744	86.8557	84.6549		98.8326	104.294	97.9641	89.1885	98.5279		93.9577	88.5669	107.93		88.6241	95.657
	0	0	0	0		0	0	0	0	0	0		0	0	0	0	0		0	0	0	0		0	0	0	0	0		0	0	0	0	0	0	0		0	0	0	0	0		0	0	0		0	0
	0.33	8.31697	-0.777776	30.219		21.937	47.0903	9.68797	17.1181	31.3494	48.0022		10.3424	14.7478	-6.84339	102.373	21.2604		25.4977	22.7539	31.3207	33.9825		8.73365	-13.6305	1.39142	28.0097	0.830776		14.1691	8.9638	3.48806	2.61941	5.32255	29.7756	19.2954		4.22203	14.5417	8.93942	1.5374	4.84174		8.59713	11.0662	10.6837		9.8979	5.21715
	0.66	11.4976	1.84858	33.9503		24.5888	62.1308	32.9106	4.02882	31.8704	41.579		59.0765	42.0944	13.7726	51.8744	16.9017		29.778	19.2637	46.8541	35.826		21.5638	12.5318	7.65208	40.7654	26.927		11.0593	9.80003	21.3841	11.4628	22.5849	64.6775	8.37525		2.89315	12.491	11.9441	0.964762	1.00608		9.93382	20.3093	11.0797		5.8689	7.26395
	1	17.9727	2.87488	26.4542		27.7635	86.5913	39.4731	-3.97843	42.6985	32.0588		29.7309	24.3786	4.2132	6.17989	15.9437		31.7424	31.0257	47.8631	38.8124		19.7126	1.23743	9.77244	51.4885	26.2071		0.934526	3.79028	7.60033	4.21998	4.97155	44.7198	7.35362		4.81284	6.87521	13.6557	4.09232	4.20814		13.683	8.90968	12.0002		9.93103	7.89265
	1.33	24.6621	8.83531	32.3834		17.8008	61.3719	46.1452	44.6597	55.2844	53.2039		37.0276	49.4131	27.652	54.2062	27.8138		32.1288	31.8832	34.5394	32.6211		41.1163	17.4803	27.4126	48.5881	23.6518		13.6834	13.8429	18.6469	7.42222	10.0689	45.7668	20.262		5.75637	11.9784	15.5777	5.85497	2.77889		13.0811	10.418	14.5952		3.82407	9.82487
	1.66	25.7945	5.9022	56.1321		26.9571	90.3593	40.3921	38.4893	61.2658	34.0919		45.4529	41.7107	23.9799	51.6015	44.8707		24.301	31.1811	32.3505	32.2587		35.3946	8.87701	16.2933	54.1972	58.0763		12.651	15.2013	28.2518	8.4211	15.16	53.4069	10.3757		6.83877	14.0488	14.0895	8.28635	2.6306		12.1372	16.3409	13.3783		7.16989	7.47482
	2	21.5078	8.37375	55.1133		22.0566	76.2257	54.1815	27.2695	47.5438	41.361		57.9435	49.9225	18.7318	37.2861	58.832		40.8363	33.3619	41.7767	43.9596		25.9261	14.9792	23.4766	58.2613	59.4409		-16.1002	26.4045	63.5804	14.9593	15.1587	67.7213	4.00115		8.34497	11.924	12.5799	2.36512	10.8207		9.19559	21.231	9.73695		0.892747	9.09579
	2.33	25.3435	13.2937	67.3666		35.1807	81.5601	51.359	39.7012	56.5464	45.5619		40.3996	62.7803	38.1482	3.06985	40.2346		31.673	36.5195	43.169	34.1143		38.812	23.8674	25.4598	58.299	57.4399		13.2527	12.4156	34.216	9.88983	22.5015	77.5	18.8123		6.00434	12.6734	15.7824	5.08731	7.69841		9.78313	18.6795	14.2078		7.43654	9.5129
	2.66	27.684	13.5616	60.7553		43.4397	118.037	61.4795	30.7944	45.656	46.7606		77.0782	48.861	44.7605	33.4696	51.1946		43.1113	36.2606	56.7121	35.3491		34.3838	29.8671	26.9877	59.8642	48.5696		21.8063	18.484	29.9123	9.71641	20.3163	51.0353	18.7261		5.72262	15.6107	12.5071	5.26256	8.65531		11.7883	13.4318	8.67324		5.77477	12.3942
	3	34.31	9.99605	62.1336		61.5706	69.7347	44.5789	41.9184	59.2481	72.5596		99.7752	67.893	46.8933	-6.17128	42.7583		59.8606	42.583	67.6068	27.7375		28.8165	34.3656	30.6508	70.689	70.9664		26.578	20.9197	17.1488	12.0874	12.0141	55.9871	13.2487		8.24807	12.2724	14.5344	4.26234	5.18517		17.1344	24.4046	12.9445		12.4688	13.4573
	4	23.9464	10.14	63.8186		44.3303	56.9807	68.335	30.681	49.9857	70.5523		79.87	64.7971	57.2004	-24.2745	35.0161		42.4196	44.1781	52.2443	46.6113		36.4974	18.714	30.0908	52.6779	57.548		41.4695	25.0732	14.6233	13.6778	12.4906	66.8906	20.8565		9.3924	14.8971	16.6573	6.57412	6.73509		15.5938	28.9258	15.6741		9.35794	11.836
	5	29.4288	16.2926	75.3475		94.1903	48.4191	68.1956	35.8664	62.7134	46.6258		134.401	78.7284	43.5574	65.6384	59.5114		50.8609	48.1093	63.782	53.6142		46.8233	24.6786	37.6425	74.4314	62.3944		20.1066	21.6988	22.3889	22.0427	22.4514	91.4035	21.9695		8.63032	16.6158	17.0413	7.43095	7.86454		9.21791	20.1079	13.5574		8.336	16.9431
	6	22.3878	19.2721	66.0324		79.6772	77.8284	80.8639	62.8058	74.0108	86.3409		118.511	69.1807	81.9876	-16.7851	93.0533		55.5259	60.2198	47.4475	74.5187		64.1134	29.5234	50.7464	83.5139	65.5656		13.1322	44.0324	50.7645	32.7391	73.7452	108.141	17.2129		7.27962	21.0255	19.7868	10.2003	8.69751		12.1596	27.4194	15.4584		8.3211	14.9585
	7	18.2223	21.5566	67.9677		87.2849	75.5443	65.3233	43.1933	92.4243	87.4592		155.557	94.811	66.6495	30.3452	90.1568		58.8251	51.3646	60.4456	50.222		50.3588	42.6152	33.4626	96.7182	82.7642		10.4684	34.8163	26.2751	26.9744	54.9144	64.0675	16.8391		4.18613	16.243	19.6178	11.0003	9.32034		6.56982	22.5316	14.5404		17.86	20.8772
	8	26.9902	17.7322	96.5933		73.6225	69.0995	71.6995	51.4551	82.91	80.7808		245.28	78.1501	42.3211	-32.5162	70.2696		70.3221	57.2799	75.2828	58.6088		70.838	26.0073	40.5816	92.3658	89.3516		17.7418	66.7796	77.6946	36.4043	72.0367	136.677	33.9143		4.5332	19.4659	26.4137	9.22606	6.75393		12.1918	40.2556	17.8839		15.0471	23.2396
	9	24.6722	24.4661	92.6505		98.6433	55.3174	43.7694	89.4807	66.2715	67.3522		286.699	76.2207	52.8559	61.7875	97.7358		63.9174	59.1902	42.6126	53.8535		49.3503	36.3243	32.3441	107.086	52.187		15.9077	76.3737	30.3373	55.6311	66.6425	78.0289	42.6343		6.31494	24.6588	21.0942	9.98965	8.08905		9.66863	22.7293	17.0562		9.37357	20.8597
	10	14.4477	25.4891	88.7623		99.2326	76.9871	47.2576	101.799	79.7509	95.2015		288.195	94.3857	78.9284	155.172	81.1447		86.6974	63.0181	99.0464	97.5235		67.1787	52.7421	48.5292	105.384	80.4156		10.6948	69.2471	38.2652	32.7725	49.8131	95.0859	41.3579		6.69258	27.2576	28.0533	11.9212	7.80309		9.18194	20.7713	23.2327		19.0173	31.1458
	11	26.2342	24.2095	136.112		88.4701	87.2921	55.0863	75.4466	56.7307	75.1719		226.879	81.6723	73.4701	92.4572	98.7801		62.6857	66.334	92.5779	54.4761		71.3775	26.8773	52.8342	114.193	73.6695		12.63	88.3386	100.745	42.9405	82.4618	185.437	37.9157		4.0636	24.5337	28.8874	6.09468	7.68535		5.39671	22.6173	24.4877		20.5073	24.0699
[truncated: 15 more columns]

## Sheet: Figure 5-figure supplement 1C
	Time (mins)	Itsn																								Clathrin
	-1.66	108.126		91.4028	94.1581	97.022	63.8572	74.3422	98.4026	87.1642	90.1721	82.0023	93.7731	87.3667		93.8561	124.825	90.9382		76.5087	87.9126	84.4099	76.4242	89.0793		95.1022	125.674	98.5086	126.588	122.954	131.633	121.822		104.805	96.8501	106.011	110.008	119.344		107.596	106.013	98.9533		116.677	104.172	112.357	102.127	96.1601	96.1392
	-1.33	70.3956		92.9071	92.7723	87.2825	94.5969	89.3696	85.435	84.5167	98.8085	79.4338	94.8897	97.8332		77.9546	87.2983	96.8796		104.286	111.36	112.263	100.108	118.828		91.0544	98.1674	100.088	104.462	114.727	83.3232	103.434		89.9494	88.4924	92.6494	100.224	90.954		105.418	111.106	110.374		101.028	99.3093	101.982	98.4109	107.912	105.639
	-1	86.9469		97.8287	102.861	109.154	115.981	125.363	105.505	113.612	119.659	122.865	98.2109	109.688		84.8273	93.8342	79.5127		98.6488	95.1066	99.9416	102.116	110.49		105.632	84.7553	87.2069	92.9904	76.0043	94.4813	101.063		105.425	104.076	105.563	98.2213	97.695		97.1	99.7368	90.6675		99.6642	106.8	102.97	105.859	101.306	97.0308
	-0.66	213.361		125.888	113.013	114.096	113.934	114.811	108.387	108.259	103.68	114.258	128.833	108.707		128.436	113.494	118.3		100.546	95.5957	88.3942	98.0128	85.0736		114.017	111.735	115.115	104.432	106.275	116.232	97.1411		102.267	106.386	99.1248	104.106	96.5624		97.148	96.3135	93.3446		97.058	95.1555	103.542	101.877	100.474	105.46
	-0.33	97.6417		93.6251	98.5956	94.5074	115.409	100.366	103.903	109.267	89.7693	105.693	85.8451	98.1734		132.693	82.8861	125.135		123.405	112.148	118.771	127.366	99.4934		94.8737	89.5806	100.044	82.0401	88.6744	86.8557	84.6549		98.8326	104.294	97.9641	89.1885	98.5279		93.9577	88.5669	107.93		88.6241	95.657	82.223	92.6741	94.3946	95.6293
	0	0		0	0	0	0	0	0	0	0	0	0	0		0	0	0		0	0	0	0	0		0	0	0	0	0	0	0		0	0	0	0	0		0	0	0		0	0	0	0	0	0
	0.33	27.5791		61.1271	44.5988	44.3636	62.245	41.4147	47.2433	45.9571	84.5685	39.3052	31.9731	48.8681		21.5812	11.7913	19.5349		7.61614	-0.19808	38.7965	24.1083	14.5521		14.1691	8.9638	3.48806	2.61941	5.32255	29.7756	19.2954		4.22203	14.5417	8.93942	1.5374	4.84174		8.59713	11.0662	10.6837		9.8979	5.21715	5.616	6.02586	7.5896	13.5235
	0.66	72.1423		68.9956	78.7265	62.9743	64.1241	26.08	57.3485	44.2744	56.7233	60.2615	57.8821	58.4836		61.4519	24.3133	29.1545		0.287479	9.40643	28.0896	42.8306	16.9557		11.0593	9.80003	21.3841	11.4628	22.5849	64.6775	8.37525		2.89315	12.491	11.9441	0.964762	1.00608		9.93382	20.3093	11.0797		5.8689	7.26395	6.71719	4.89478	10.5031	18.8313
	1	39.995		110.672	92.5726	92.2185	58.841	89.068	91.0437	71.2552	77.2159	90.0298	76.3189	95.6121		47.8805	38.6197	59.044		10.6542	8.76308	42.0493	49.8506	19.4623		0.934526	3.79028	7.60033	4.21998	4.97155	44.7198	7.35362		4.81284	6.87521	13.6557	4.09232	4.20814		13.683	8.90968	12.0002		9.93103	7.89265	9.00379	5.0814	9.23234	21.9574
	1.33	133.995		74.0148	60.1791	96.2647	50.4448	80.1892	45.0466	59.635	56.5126	99.6871	31.0075	52.7653		85.9473	45.704	68.5878		14.8237	4.40646	44.4062	36.6645	9.35954		13.6834	13.8429	18.6469	7.42222	10.0689	45.7668	20.262		5.75637	11.9784	15.5777	5.85497	2.77889		13.0811	10.418	14.5952		3.82407	9.82487	11.8771	6.34375	12.275	19.7786
	1.66	48.9995		75.4758	58.2084	70.2152	44.0505	73.997	45.7416	48.3421	69.8743	45.3708	27.6872	34.5042		62.3777	38.593	54.8627		25.7676	18.4038	51.747	48.3248	22.3096		12.651	15.2013	28.2518	8.4211	15.16	53.4069	10.3757		6.83877	14.0488	14.0895	8.28635	2.6306		12.1372	16.3409	13.3783		7.16989	7.47482	12.5184	7.02366	5.69421	9.71983
	2	69.2835		69.9656	53.532	71.1341	47.4773	32.2355	78.2119	53.1343	77.0386	55.7762	37.5631	36.0482		78.6311	86.6595	75.7303		8.25944	10.5416	30.2061	47.1705	23.0631		-16.1002	26.4045	63.5804	14.9593	15.1587	67.7213	4.00115		8.34497	11.924	12.5799	2.36512	10.8207		9.19559	21.231	9.73695		0.892747	9.09579	15.0591	7.40255	8.6001	12.6704
	2.33	41.3863		112.729	87.8354	76.526	56.8791	115.904	87.0537	76.6526	93.106	75.1261	35.186	90.74		85.7847	86.2148	77.7882		26.0927	12.6585	51.9889	50.8594	22.5168		13.2527	12.4156	34.216	9.88983	22.5015	77.5	18.8123		6.00434	12.6734	15.7824	5.08731	7.69841		9.78313	18.6795	14.2078		7.43654	9.5129	15.6228	11.8279	7.39645	17.7015
	2.66	52.4889		117.869	78.0908	74.3862	49.7811	75.5007	79.3537	63.5774	93.5648	53.5919	14.0104	87.6301		81.2039	62.2718	68.7432		12.0566	12.3011	28.2663	75.9317	30.6757		21.8063	18.484	29.9123	9.71641	20.3163	51.0353	18.7261		5.72262	15.6107	12.5071	5.26256	8.65531		11.7883	13.4318	8.67324		5.77477	12.3942	12.4078	9.8117	8.48629	30.0809
	3	66.6693		136.389	95.8095	82.4539	36.0536	91.7028	82.0275	67.4989	102.411	97.831	30.3036	106.993		72.567	65.012	54.1906		21.325	28.9297	46.9244	85.4562	51.4236		26.578	20.9197	17.1488	12.0874	12.0141	55.9871	13.2487		8.24807	12.2724	14.5344	4.26234	5.18517		17.1344	24.4046	12.9445		12.4688	13.4573	14.4193	10.8917	14.7686	27.4488
	4	31.1519		140.177	114.79	93.9621	35.002	84.201	79.1954	76.1011	100.938	76.7549	35.0095	102.854		98.7395	87.7958	58.9316		13.0007	14.9063	12.6966	73.2258	43.3054		41.4695	25.0732	14.6233	13.6778	12.4906	66.8906	20.8565		9.3924	14.8971	16.6573	6.57412	6.73509		15.5938	28.9258	15.6741		9.35794	11.836	15.2313	9.76828	13.8773	28.5089
	5	87.0056		126.655	171.754	126.785	51.4403	127.455	92.6423	88.2799	137.964	140.213	50.4709	134.782		141.971	126.039	112.887		14.4019	45.0222	93.9907	112.602	52.6722		20.1066	21.6988	22.3889	22.0427	22.4514	91.4035	21.9695		8.63032	16.6158	17.0413	7.43095	7.86454		9.21791	20.1079	13.5574		8.336	16.9431	19.1329	9.75714	14.6185	22.0217
	6	82.4435		137.267	106.948	85.0849	51.4696	100.692	96.5252	64.8786	108.064	123.907	32.5405	121.323		82.3984	131.852	104.092		39.0952	27.435	102.082	91.5139	76.9966		13.1322	44.0324	50.7645	32.7391	73.7452	108.141	17.2129		7.27962	21.0255	19.7868	10.2003	8.69751		12.1596	27.4194	15.4584		8.3211	14.9585	18.7083	10.6834	16.764	24.5809
	7	64.9104		169.072	101.481	95.6229	27.8227	74.8928	79.3586	82.0649	118.702	134.051	52.1535	75.8087		67.5634	165.214	63.9944		72.8249	60.7881	164.006	129.362	84.029		10.4684	34.8163	26.2751	26.9744	54.9144	64.0675	16.8391		4.18613	16.243	19.6178	11.0003	9.32034		6.56982	22.5316	14.5404		17.86	20.8772	21.6447	12.6923	16.5295	30.0902
	8	112.962		106.894	59.8945	76.7454	14.9791	47.0627	67.1218	81.5837	93.6938	78.3077	15.5245	107.13		94.3577	173.815	67.6199		60.6531	44.3405	111.305	85.4868	62.3804		17.7418	66.7796	77.6946	36.4043	72.0367	136.677	33.9143		4.5332	19.4659	26.4137	9.22606	6.75393		12.1918	40.2556	17.8839		15.0471	23.2396	33.1067	14.9862	26.1208	37.4535
	9	80.8157		134.854	71.691	85.0886	52.5492	100.149	77.8767	68.1066	134.331	112.276	11.6713	93.1402		60.8135	120.077	53.6602		82.5553	84.2012	145.133	121.961	138.449		15.9077	76.3737	30.3373	55.6311	66.6425	78.0289	42.6343		6.31494	24.6588	21.0942	9.98965	8.08905		9.66863	22.7293	17.0562		9.37357	20.8597	21.4264	10.2727	14.3611	34.4863
	10	85.1578		146.259	133.378	72.0614	35.4883	119.21	95.7411	81.0744	96.6607	81.5138	42.4476	88.5644		77.5506	208.452	59.7459		76.1001	58.3307	95.7616	118.643	105.855		10.6948	69.2471	38.2652	32.7725	49.8131	95.0859	41.3579		6.69258	27.2576	28.0533	11.9212	7.80309		9.18194	20.7713	23.2327		19.0173	31.1458	31.2766	16.2963	16.6401	58.1118
	11	104.823		163.292	111.874	119.502	38.2619	94.9767	115.098	89.4507	107.907	143.598	9.69156	79.647		79.7137	198.445	51.981		47.1373	35.0781	93.7697	82.0709	59.6335		12.63	88.3386	100.745	42.9405	82.4618	185.437	37.9157		4.0636	24.5337	28.8874	6.09468	7.68535		5.39671	22.6173	24.4877		20.5073	24.0699	24.9209	14.5974	21.9671	49.2983

## Sheet: Figure 5-figure supplement 1D
	Time (mins)	CPG2																									Clathrin
	-1.66	103.832	129.728	118.865	134.329	114.466	103.667	120.906	106.671	106.536	93.8476	94.673		98.0046	96.1171	90.0548	72.3371	96.568	92.6939	112.638	115.222	38.665	105.295	72.0772			95.1022	125.674	98.5086	126.588	122.954	131.633	121.822		104.805	96.8501	106.011	110.008	119.344		107.596	106.013	98.9533		116.677	104.172	112.357	102.127	96.1601
	-1.33	123.28	105.4	112.19	99.6554	115.483	110.582	114.128	115.918	106.623	114.487	122.803		124.194	155.126	164.274	97.1773	103.801	106.923	114.277	78.8366	104.926	97.6771	103.73			91.0544	98.1674	100.088	104.462	114.727	83.3232	103.434		89.9494	88.4924	92.6494	100.224	90.954		105.418	111.106	110.374		101.028	99.3093	101.982	98.4109	107.912
	-1	95.6074	93.3914	111.605	126.352	89.5561	92.1987	80.748	88.3089	90.7391	97.8759	92.6478		122.204	96.4913	105.517	103.996	89.9644	91.0762	85.1094	118.759	108.766	96.458	116.186			105.632	84.7553	87.2069	92.9904	76.0043	94.4813	101.063		105.425	104.076	105.563	98.2213	97.695		97.1	99.7368	90.6675		99.6642	106.8	102.97	105.859	101.306
	-0.66	87.625	103.866	110.394	88.83	98.414	106.279	111.861	105.255	111.973	96.9581	104.283		75.8184	62.6291	76.4366	109.783	103.198	110.646	96.5985	77.7204	124.42	99.6431	105.747			114.017	111.735	115.115	104.432	106.275	116.232	97.1411		102.267	106.386	99.1248	104.106	96.5624		97.148	96.3135	93.3446		97.058	95.1555	103.542	101.877	100.474
	-0.33	92.3317	70.5533	63.457	72.2158	86.5776	90.4117	79.8884	88.1263	88.0811	97.3739	88.6071		97.918	121.762	94.1354	105.803	105.575	97.3106	97.8241	111.381	100.788	102.709	92.0472			94.8737	89.5806	100.044	82.0401	88.6744	86.8557	84.6549		98.8326	104.294	97.9641	89.1885	98.5279		93.9577	88.5669	107.93		88.6241	95.657	82.223	92.6741	94.3946
	0	0	0	0	0	0	0	0	0	0	0	0		0	0	0	0	0	0	0	0	0	0	0			0	0	0	0	0	0	0		0	0	0	0	0		0	0	0		0	0	0	0	0
	0.33	56.5663	23.0173	0.535894	23.2833	3.45098	-6.41544	2.88435	3.40813	0.115604	-2.08724	5.42261		29.5189	51.8304	24.5916	0.775982	16.6088	26.6239	-8.89795	2.1077	6.46147	14.8518	31.3505			14.1691	8.9638	3.48806	2.61941	5.32255	29.7756	19.2954		4.22203	14.5417	8.93942	1.5374	4.84174		8.59713	11.0662	10.6837		9.8979	5.21715	5.616	6.02586	7.5896
	0.66	30.1502	15.3391	48.5144	49.064	9.67081	6.26119	2.48047	-0.207296	-0.820663	2.15544	17.6787		33.5304	60.2489	46.7926	-17.7988	9.10808	31.086	3.39761	2.45354	-21.8796	12.5398	16.9513			11.0593	9.80003	21.3841	11.4628	22.5849	64.6775	8.37525		2.89315	12.491	11.9441	0.964762	1.00608		9.93382	20.3093	11.0797		5.8689	7.26395	6.71719	4.89478	10.5031
	1	25.8459	22.7917	41.6083	34.9086	17.28	3.67227	3.52591	-5.3504	22.3912	3.14757	-13.4633		34.7086	50.9627	51.2084	26.258	15.6749	40.6126	38.2859	42.365	53.6213	27.5321	40.6038			0.934526	3.79028	7.60033	4.21998	4.97155	44.7198	7.35362		4.81284	6.87521	13.6557	4.09232	4.20814		13.683	8.90968	12.0002		9.93103	7.89265	9.00379	5.0814	9.23234
	1.33	35.8653	43.1915	30.5905	36.5443	-8.17452	8.50321	-5.56948	-6.13947	14.9621	-7.394	-6.43782		36.3992	58.6865	64.0245	31.3904	32.4289	46.3875	17.3132	42.0069	44.8131	35.3896	37.7793			13.6834	13.8429	18.6469	7.42222	10.0689	45.7668	20.262		5.75637	11.9784	15.5777	5.85497	2.77889		13.0811	10.418	14.5952		3.82407	9.82487	11.8771	6.34375	12.275
	1.66	27.3367	15.0258	48.7551	39.9659	13.7976	-0.310133	3.95595	13.3795	10.4077	10.1635	-2.46285		34.1304	53.4512	60.201	34.8257	20.1714	43.0336	36.1139	0.424329	76.7532	18.0654	30.6831			12.651	15.2013	28.2518	8.4211	15.16	53.4069	10.3757		6.83877	14.0488	14.0895	8.28635	2.6306		12.1372	16.3409	13.3783		7.16989	7.47482	12.5184	7.02366	5.69421
	2	36.1872	44.0685	50.7131	40.1294	13.4712	8.1595	7.11456	2.40098	6.34939	-6.90888	3.28965		39.0835	66.8771	42.5845	38.4072	40.4387	24.1133	48.6014	51.8837	37.6656	26.7728	27.2224			-16.1002	26.4045	63.5804	14.9593	15.1587	67.7213	4.00115		8.34497	11.924	12.5799	2.36512	10.8207		9.19559	21.231	9.73695		0.892747	9.09579	15.0591	7.40255	8.6001
	2.33	23.2508	43.8465	26.1768	33.2069	25.7533	8.14252	17.5594	4.79411	12.6216	12.9184	22.7885		46.9103	70.1649	43.3188	26.5605	53.4087	20.6754	34.2305	56.0849	62.6458	22.5794	32.0622			13.2527	12.4156	34.216	9.88983	22.5015	77.5	18.8123		6.00434	12.6734	15.7824	5.08731	7.69841		9.78313	18.6795	14.2078		7.43654	9.5129	15.6228	11.8279	7.39645
	2.66	44.987	38.0945	47.2767	29.4304	19.2887	6.92602	22.5032	9.75983	9.69464	13.4023	28.5153		50.9758	68.8725	66.3446	48.5588	45.0337	33.4818	38.142	58.358	43.4751	31.9693	40.3355			21.8063	18.484	29.9123	9.71641	20.3163	51.0353	18.7261		5.72262	15.6107	12.5071	5.26256	8.65531		11.7883	13.4318	8.67324		5.77477	12.3942	12.4078	9.8117	8.48629
	3	20.2482	16.7199	48.5253	33.42	8.90061	12.4037	7.38735	3.44411	3.81522	0.0624778	13.5794		63.2914	102.623	107.133	21.8745	33.2672	20.76	14.5484	31.4174	15.1408	21.5764	16.2288			26.578	20.9197	17.1488	12.0874	12.0141	55.9871	13.2487		8.24807	12.2724	14.5344	4.26234	5.18517		17.1344	24.4046	12.9445		12.4688	13.4573	14.4193	10.8917	14.7686
	4	18.3059	33.6463	35.5965	43.3761	8.16974	-2.49227	8.55854	3.83538	14.3338	1.57034	17.661		49.1555	70.5675	56.9062	41.7107	32.5511	23.6985	22.2154	38.4733	17.3309	8.72569	22.5068			41.4695	25.0732	14.6233	13.6778	12.4906	66.8906	20.8565		9.3924	14.8971	16.6573	6.57412	6.73509		15.5938	28.9258	15.6741		9.35794	11.836	15.2313	9.76828	13.8773
	5	64.2461	46.1954	30.1885	36.7408	20.5993	3.09185	5.0269	-0.624442	10.4676	4.35491	19.3935		21.2345	49.3171	56.0463	14.2695	42.877	30.9763	51.3221	30.0326	20.8284	45.22	17.2197			20.1066	21.6988	22.3889	22.0427	22.4514	91.4035	21.9695		8.63032	16.6158	17.0413	7.43095	7.86454		9.21791	20.1079	13.5574		8.336	16.9431	19.1329	9.75714	14.6185
	6	48.2342	48.8491	58.5879	60.283	12.5011	-5.56899	3.41823	6.6787	7.72278	2.02831	2.03994		47.1253	70.0692	63.9939	27.5007	21.3952	31.5344	58.2785	-5.96285	20.0205	20.1236	18.0832			13.1322	44.0324	50.7645	32.7391	73.7452	108.141	17.2129		7.27962	21.0255	19.7868	10.2003	8.69751		12.1596	27.4194	15.4584		8.3211	14.9585	18.7083	10.6834	16.764
	7	67.9939	59.8638	45.2527	37.9851	9.96069	-1.46897	3.11265	-2.21684	8.18807	2.64178	16.8998		47.1543	58.8322	47.5807	72.4447	29.0813	21.9481	22.4761	24.5692	22.6541	20.5972	28.7553			10.4684	34.8163	26.2751	26.9744	54.9144	64.0675	16.8391		4.18613	16.243	19.6178	11.0003	9.32034		6.56982	22.5316	14.5404		17.86	20.8772	21.6447	12.6923	16.5295
	8	59.5164	58.5733	48.0791	47.2747	5.49402	0.801464	12.2975	8.07109	7.66093	8.98704	5.13469		43.5414	50.404	47.3159	15.4783	36.4025	50.1769	25.2961	48.1243	30.2079	10.4444	20.835			17.7418	66.7796	77.6946	36.4043	72.0367	136.677	33.9143		4.5332	19.4659	26.4137	9.22606	6.75393		12.1918	40.2556	17.8839		15.0471	23.2396	33.1067	14.9862	26.1208
	9	93.9682	65.0831	59.851	60.8131	18.7392	7.84405	0.985707	2.7911	10.762	27.9399	17.5794		61.9454	67.5165	58.9473	34.2767	80.3584	74.5029	96.5098	64.807	26.2308	27.2791	23.5863			15.9077	76.3737	30.3373	55.6311	66.6425	78.0289	42.6343		6.31494	24.6588	21.0942	9.98965	8.08905		9.66863	22.7293	17.0562		9.37357	20.8597	21.4264	10.2727	14.3611
	10	26.8859	58.132	50.2032	49.9044	22.3431	18.3542	30.7213	10.0047	27.9969	11.3141	9.38055		31.0811	54.2166	49.0939	13.8766	32.0453	18.1684	22.0171	42.8802	40.3147	8.75234	18.6481			10.6948	69.2471	38.2652	32.7725	49.8131	95.0859	41.3579		6.69258	27.2576	28.0533	11.9212	7.80309		9.18194	20.7713	23.2327		19.0173	31.1458	31.2766	16.2963	16.6401
	11	63.1048	32.8652	52.892	35.3362	17.8199	6.78688	15.7306	1.9754	9.20744	4.41703	1.40613		38.1201	62.6266	55.9704	40.0935	75.5595	66.8612	70.568	54.0702	66.3451	27.454	30.6917			12.63	88.3386	100.745	42.9405	82.4618	185.437	37.9157		4.0636	24.5337	28.8874	6.09468	7.68535		5.39671	22.6173	24.4877		20.5073	24.0699	24.9209	14.5974	21.9671
[truncated: 12 more columns]

## Sheet: Figure 5-figure supplement 1E
	Time (mins)	Hip1R
	-1.66	106.042	90.8481	85.0013	87.0637	80.6916	93.2476	75.8395	73.0753	99.7886	99.5858	77.9233	106.473	103.794	90.1485	76.8856	89.8584	83.5223		87.5597	59.1138	92.0602	82.3569	88.5183	111.365	56.3851		109.711	101.642	95.3252	100.878	100.752	98.8049	109.021	113.88		103.03	80.0362	73.1679	92.3751	128.727	82.9997	98.7618		102.652	91.7355	91.7355	107.278	111.386
	-1.33	114.121	118.542	108.882	132.098	101.434	121.578	94.5026	95.8877	113.529	88.7071	116.689	119.531	117.566	89.9946	118.223	112.41	109.695		92.4927	98.0685	87.5305	92.7499	111.632	126.436	113.368		91.1669	98.212	101.801	98.0598	92.2051	107.358	92.2976	102.949		68.2583	95.4095	102.658	77.2358	88.192	77.9957	81.3547		101.945	97.3061	97.3061	97.3103	97.0762
	-1	91.6652	91.9663	107.969	80.9384	104.433	96.3899	119.663	97.4968	87.6866	88.6547	90.7208	88.0134	81.5908	84.763	104.541	101.268	102.698		110.053	97.8088	102.938	102.678	90.7395	62.7596	134.054		111.437	79.8765	101.718	90.1654	118.385	101.67	99.8059	106.086		121.191	81.9192	93.5705	89.732	94.1907	105.484	93.2265		113.094	109.293	109.293	105.322	106.794
	-0.66	104.259	105.41	98.7226	120.541	110.515	117.875	105.466	121.14	102.59	119.561	109.096	110.201	95.1939	110.998	106.1	98.4662	118.473		107.561	117.724	99.2654	122.223	96.4765	76.4466	100.829		87.6406	98.4558	100.898	105.146	91.5556	94.5233	105.139	96.3796		99.8848	121.818	115.654	126.217	99.4177	140.212	145.084		87.6382	98.9274	98.9274	94.2211	94.9351
	-0.33	83.9126	93.2336	99.4248	79.359	102.925	70.9101	104.529	112.4	96.4064	103.492	105.57	75.7812	101.855	124.096	94.2506	97.9969	85.6116		102.333	127.285	118.206	99.9928	112.634	122.993	95.3638		100.044	121.814	100.257	105.751	97.1026	97.6446	93.7368	80.7044		107.636	120.817	114.95	114.44	89.4724	93.308	81.5732		94.6707	102.738	102.738	95.8687	89.8083
	0	0	0	0	0	0	0	0	0	0	0	0	0	0	0	0	0	0		0	0	0	0	0	0	0		0	0	0	0	0	0	0	0		0	0	0	0	0	0	0		0	0	0	0	0
	0.33	14.5993	7.40501	6.51383	-1.00162	7.43918	18.6349	19.5533	13.8305	7.53072	-1.96603	24.681	-0.401786	28.6678	23.8498	19.4894	22.0959	35.8739		21.5431	12.0597	9.54046	61.6185	-6.90478	39.3653	30.4199		23.0322	40.7835	20.7239	72.4682	27.8376	41.2038	52.6363	36.6411		43.7854	15.8499	45.5736	27.1505	45.3413	36.6293	-5.53532		25.7688	24.9848	24.9848	3.43933	5.63829
	0.66	14.0646	-9.39294	3.03697	-11.9038	7.70726	-1.85131	6.49695	12.032	7.38539	1.36311	6.52936	-14.375	14.0247	11.3671	25.8819	8.12507	29.0555		26.5274	44.9278	25.4647	84.4212	0.317315	73.8511	45.8051		4.61136	33.4363	19.8565	78.8168	33.7607	46.5326	63.3465	40.8277		34.262	13.7287	37.2288	34.7118	66.7228	12.2431	17.6256		29.0984	17.0584	17.0584	-3.25397	10.0871
	1	15.8023	0.397585	12.2663	14.1382	20.9436	27.453	18.4445	22.1918	19.9102	19.2409	12.7229	2.5	21.5008	24.4845	28.7273	26.9093	46.871		40.7995	44.0026	41.5415	60.5923	4.60742	78.3499	69.048		28.334	64.3856	40.2001	71.743	35.7265	61.2153	48.5418	40.2374		46.3988	12.9183	55.0518	34.143	69.6169	-3.06912	-29.1333		37.0389	28.2412	28.2412	7.22877	19.1512
	1.33	19.842	5.30527	12.3678	9.74651	27.0927	11.0591	22.6613	20.3197	23.0942	8.96508	15.2974	-1.85268	35.6099	11.0402	28.1622	25.716	44.7007		76.011	62.4412	55.8463	44.8417	13.5684	90.8776	39.7418		56.9639	54.9252	40.2358	83.257	44.4701	79.6045	73.789	50.8187		60.4624	38.2544	74.7117	55.2043	89.3672	35.5618	0.546249		20.0278	17.4602	17.4602	-13.7367	23.1955
	1.66	26.5995	4.90769	23.7543	36.8672	28.0477	14.5913	38.0759	24.716	21.8391	11.9272	36.9189	16.6295	58.6284	18.1182	22.7831	22.1361	58.1433		80.8926	69.031	80.8416	47.2997	10.6364	80.2187	68.1406		72.4255	26.8368	46.1416	88.3142	64.9402	69.7271	60.5128	50.1301		30.5634	55.01	42.1927	28.0036	65.1091	3.70296	18.3176		43.466	40.0477	40.0477	15.3843	14.4169
	2	31.2481	5.15618	19.4823	26.8125	38.8546	21.2901	33.0782	35.6542	22.896	40.4215	40.2395	29.5312	43.3952	14.7715	36.9129	20.6747	54.4344		100.933	52.2318	93.7617	50.4737	2.88122	75.7198	73.214		83.1278	26.0241	51.0374	81.1896	67.1966	88.64	96.1019	43.637		27.95	58.2515	32.7145	6.77507	68.3365	-11.4091	-51.9665		41.6095	42.1401	42.1401	0.453085	5.56692
	2.33	35.6294	6.47318	36.4775	44.1482	48.0196	17.8067	35.4053	33.7295	19.3421	51.6934	36.4525	30.1116	59.2749	31.024	44.2994	15.8747	56.0054		101.986	77.2764	83.9162	73.0497	14.7742	77.0176	51.8685		93.5835	36.7198	49.2312	77.4046	64.2393	82.7258	78.1288	43.5933		49.5438	80.1316	47.2543	33.2564	87.8762	-7.506	-36.0524		29.6331	43.9	43.9	19.874	11.1814
	2.66	24.4757	8.89596	29.6168	11.7112	34.6324	12.8617	41.0433	29.6592	18.2455	24.7982	55.1078	16.1161	34.3732	14.5407	36.1918	32.0444	40.425		108.974	59.3572	83.7636	58.5877	10.3952	65.0436	47.0426		53.3143	56.8433	60.1754	78.8359	62.2137	73.2694	89.7427	46.2605		23.8971	57.8701	44.401	39.5965	59.391	9.27409	-45.3023		32.549	43.9416	43.9416	17.4026	5.42418
	3	23.6737	21.9293	35.1747	25.079	46.3441	50.5456	32.6253	40.8077	34.0336	43.8031	51.2648	20.4688	57.982	7.94353	39.6024	27.3249	58.8397		111.467	83.6228	79.4686	46.7747	12.0453	57.3782	36.5451		91.6108	66.6125	81.8975	101.679	58.5556	78.3416	95.3879	45.6265		44.2727	79.5119	50.8306	44.8325	50.007	8.84041	-8.41224		31.0457	60.6397	60.6397	14.3957	16.106
	4	20.7034	16.4873	23.4921	27.3904	34.7329	35.7595	36.3892	41.8069	24.8382	42.3089	39.2508	19.442	57.1951	8.61671	34.8665	23.1015	27.3873		90.4373	72.8778	81.4988	42.2762	11.0426	52.3948	33.8022		61.5013	48.9109	63.063	81.9148	46.0684	67.9405	77.2475	44.4568		43.2982	57.8463	50.5765	30.9646	61.7238	17.1804	-6.22724		21.1478	57.6742	57.6742	16.8877	24.8846
	5	23.0054	21.9293	35.7076	35.7886	33.0574	35.1993	35.8582	51.5671	31.4573	44.5633	55.2757	13.3705	41.9618	0.788583	21.2434	24.8311	38.854		127.833	76.6272	55.2478	52.9318	50.6816	69.3002	42.5466		84.8294	56.632	73.6269	93.6896	59.8034	87.0177	110.929	69.2267		85.9763	64.3531	31.9132	44.1969	67.0561	15.3122	4.47924		44.4548	73.4577	73.4577	29.5947	18.6397
	6	42.4761	32.2541	41.2317	14.1382	50.9517	33.4454	50.164	44.3626	38.301	63.6206	37.5718	24.7991	41.8775	10.7517	43.1105	26.0512	35.4528		120.125	80.5713	49.1222	73.4673	28.7995	121.885	65.1295		91.5368	49.4798	56.1352	71.2977	71.8889	90.4573	84.8339	62.4057		57.8933	53.1271	25.171	52.7786	87.6482	14.2447	6.91916		43.2642	70.8525	70.8525	42.487	26.1931
	7	58.5754	40.4791	38.7869	7.74328	50.7674	27.5261	54.1933	44.1523	27.7447	50.0419	47.3659	8.19196	40.9219	6.23173	49.6589	18.3417	38.0118		101.909	101.688	44.4048	53.3852	18.7597	106.503	81.4428		39.0363	24.6912	66.711	73.9249	66.547	61.0921	53.1383	32.4545		44.0069	29.7931	10.9439	52.511	95.1379	-8.87377	14.3846		33.5378	73.721	73.721	44.32	19.6151
	8	47.1247	28.1664	47.0519	35.2107	60.6528	46.4289	63.4234	58.5928	42.3306	38.3244	49.3433	27.8795	70.0675	14.7715	49.3861	32.9025	81.5464		112.97	73.9003	52.0207	80.3403	14.495	124.567	90.3316		67.3456	17.2789	64.1562	84.8346	73.8718	61.3487	88.6494	42.1394		42.2351	81.1564	78.9134	43.0259	68.4944	58.0464	10.3423		37.9974	78.8898	78.8898	34.8052	25.86
	9	76.3084	41.97	51.7215	19.1848	56.1792	39.7301	73.1688	47.1918	42.7401	31.404	51.6752	43.7946	68.4373	16.2525	46.755	28.5852	51.7783		100.11	91.9818	58.4749	59.5661	20.1939	94.1653	73.4821		73.042	49.8375	89.2293	84.9491	89.0427	108.005	91.684	49.5398		83.3407	43.3073	55.7358	38.0073	81.3338	23.8524	-42.8623		39.0871	72.5708	72.5708	40.4687	32.783
	10	61.4567	52.1209	52.4321	48.694	85.2825	21.4362	80.3842	48.0438	43.4271	52.742	36.3033	41.4509	74.1709	21.7726	46.0339	23.9059	60.7994		136.915	85.0998	40.8843	68.754	18.4297	201.222	96.2094		79.8481	31.0631	64.8692	88.4796	64.2137	93.6505	65.0311	26.027		68.7456	79.2974	46.8829	39.6467	57.7247	6.87216	-7.39257		38.9055	73.1112	73.1112	66.4799	50.5543
	11	67.4716	48.319	71.0008	63.8339	81.1943	59.2907	72.9502	47.2024	48.8043	51.4575	35.8742	52.3214	78.9207	22.2727	57.5326	24.3752	57.787		109.385	85.0998	57.8882	88.8361	14.2538	264.31	92.9921		30.8246	28.7549	60.211	92.2392	57.265	83.999	71.2118	51.5183		90.14	51.1488	63.6506	50.6206	53.4624	24.2861	8.88565		38.3909	92.3452	92.3452	59.7043	40.0866

## Sheet: Figure 5-figure supplement 1F
	Time (mins)	Dynamin-2
	-1.66	115.461	85.0471	73.7066	106.092	86.3526	96.4168	84.7562	85.1702	94.2755	108.584	62.8746	61.9413	76.3158	90.5038	95.8183	105.313	86.7127	97.8356	123.277	88.3623	91.6165	103.516	105.685	99.1221	96.2746	69.969	99.6411	90.3597	75.7865	90.1336	65.4711	120.899	92.0737		83.4616	92.601	76.1134	64.3574	76.2877	101.263	87.7085	80.3357	81.9132		101.063	108.178	98.0469	100.264
	-1.33	114.534	100.317	84.6692	97.9126	98.0963	111.486	117.485	99.1324	113.171	103.696	92.8197	77.0931	96.0961	110.161	105.001	99.8402	91.5024	86.8245	121.063	108.432	105.885	104.641	111.091	96.0065	110.296	94.4595	106.717	104.455	97.2241	109.736	129.328	74.7957	83.6794		87.672	95.3986	96.0857	113.134	102.483	95.125	104.287	108.496	105.59		92.4194	105.607	91.7539	90.5569
	-1	105.257	86.8122	84.3171	79.2648	102.996	98.6434	101.529	102.069	88.5188	104.259	88.1618	93.2303	103.869	110.761	99.63	96.9529	95.5656	100.453	76.3477	106.75	96.25	106.716	79.5444	98.0909	91.4491	83.5918	118.878	110.027	92.2232	79.8895	108.28	64.1476	106.932		92.4258	104.052	102.314	114.512	117.123	87.3554	99.4003	106.269	101.966		79.9731	100.836	94.9454	116.783
	-0.66	87.9055	117.434	125.603	114.745	106.26	87.5868	89.597	102.68	106.339	90.0486	94.493	106.928	106.036	88.7191	94.6198	97.4583	98.5393	102.97	77.3108	89.1279	86.6783	82.7047	102.151	106.554	96.367	102.226	87.9409	91.628	113.557	100.404	89.7887	104.006	104.051		111.169	112.167	107.693	120.088	110.139	119.193	104.035	102.775	108.134		121.388	109.615	114.971	100.775
	-0.33	76.8423	110.39	131.704	101.986	106.295	105.867	106.633	110.949	97.6957	93.4128	161.651	160.807	117.683	99.8551	104.93	100.436	127.68	111.916	102.001	107.328	119.57	102.422	101.529	100.227	105.614	149.754	86.8232	103.531	121.209	119.838	107.132	136.152	113.264		125.272	95.7809	117.794	87.9092	93.9675	97.0634	104.57	102.124	102.397		105.157	75.7635	100.283	91.6213
	0	0	0	0	0	0	0	0	0	0	0	0	0	0	0	0	0	0	0	0	0	0	0	0	0	0	0	0	0	0	0	0	0	0		0	0	0	0	0	0	0	0	0		0	0	0	0
	0.33	18.3341	-27.3343	34.549	21.8531	32.7638	26.0926	40.7066	47.4227	31.25	18.7254	74.6379	53.362	40.5723	58.2219	52.1354	19.4509	27.2283	8.62721	37.4859	42.2482	31.8252	9.86102	36.7576	47.6681	38.1741	93.4489	58.6136	54.3421	36.978	43.2075	37.687	86.5661	62.8108		24.2213	48.8809	44.4976	5.44512	19.2575	16.7668	39.2149	20.3837	18.4595		49.4032	32.828	27.9925	35.4649
	0.66	45.6306	2.04035	105.316	40.5009	46.5222	47.0842	73.8788	54.5338	50.566	28.5245	83.1169	36.4919	51.5329	64.544	57.0307	30.0284	38.5838	19.123	39.8249	35.5332	20.8064	13.0385	44.1471	38.7267	38.1391	67.0755	78.7121	58.9849	71.2385	41.4872	33.9825	35.1099	91.05		31.2387	38.1073	42.8464	0.951256	11.8329	12.4217	37.4177	17.1292	16.786		46.7647	51.5619	36.5555	44.3205
	1	63.5691	34.2002	110.246	71.5436	63.7318	46.5453	77.0675	66.1664	57.4062	45.7185	105.882	28.8138	54.26	72.835	64.6296	47.8888	54.5019	25.9743	67.7799	39.8132	51.7937	23.3811	42.4756	41.6581	37.0721	48.6765	75.1948	70.6235	34.8172	40.2261	45.7584	68.0327	96.7973		31.8046	29.9055	39.5804	-9.84058	22.761	15.9915	37.3874	24.3919	21.4557		48.7117	51.2787	45.95	89.1945
	1.33	44.2938	27.561	122.403	71.2752	73.6093	38.3686	83.5862	65.3916	73.674	51.8043	80.9066	41.4544	51.5112	72.3214	66.0059	61.1969	59.8023	29.3184	67.0544	54.4357	38.0709	22.1659	41.7435	35.0882	39.015	84.7131	93.991	69.6364	54.3017	56.7175	51.4394	63.313	121.264		21.935	25.179	37.6621	6.7572	22.8538	-2.90754	38.8211	21.0346	20.0745		63.3962	74.0208	59.8171	124.745
	1.66	50.828	40.5156	92.8605	82.1386	81.6168	53.1215	71.2623	70.6013	64.9822	64.1028	96.9281	44.4103	55.6887	85.433	59.2417	72.5815	79.3183	34.7721	67.7048	59.519	52.8093	30.2672	47.8765	53.5383	42.7671	77.0296	81.655	50.3019	56.8021	43.3433	58.1448	81.645	152.398		50.7968	53.8333	65.3684	41.232	37.9118	19.2221	50.6543	72.4221	32.1909		46.1824	49.7538	56.1199	108.992
	2	36.4772	29.4718	118.062	66.0645	64.7586	62.2019	85.0391	93.0969	82.3092	69.5617	98.7512	72.8155	64.7603	91.4126	67.3549	67.3475	72.6106	35.6804	49.9562	42.813	65.5038	29.1555	43.15	41.8643	42.5442	70.2043	94.4934	54.7209	64.7185	65.3318	53.4883	70.5652	104.051		37.6901	38.6112	68.2823	5.93715	43.4107	20.7081	49.8465	57.8965	33.1847		50.04	46.8131	74.8303	107.927
	2.33	27.924	54.377	90.9926	79.2332	73.1604	59.7849	95.8329	84.2016	84.6054	74.5366	120.33	87.4387	54.6422	92.0777	68.8162	75.1201	75.3345	41.7606	47.3796	63.5104	50.0546	37.6303	53.9403	67.8269	46.7104	84.1317	85.8593	47.8513	72.8048	41.8364	34.5413	53.9312	125.797		29.0203	41.8433	47.8	17.1554	9.79118	13.6977	48.6047	31.5519	24.1231		53.6065	68.466	76.2125	67.7793
	2.66	40.9789	18.6223	100.692	65.6698	87.6136	59.5834	86.7041	79.9502	51.6171	74.8619	117.145	83.7258	47.6637	69.2262	80.3635	79.1474	84.386	45.5941	42.9018	73.2127	42.6664	42.104	48.5394	49.7378	46.9174	81.349	101.918	62.566	76.2016	60.3456	56.6547	48.6359	173.267		10.9562	53.0687	52.7536	31.9819	7.79582	9.65949	46.8075	35.1148	24.5615		41.1238	39.363	69.3914	69.5249
	3	52.9015	44.0295	84.1869	86.1492	87.1529	62.9641	94.6757	81.0462	48.1808	63.2379	116.359	89.8178	38.4054	75.4692	59.4059	78.5989	76.3049	65.7885	75.6598	79.2876	57.5825	40.7223	52.2169	51.9327	47.9398	75.2852	91.1505	57.2403	61.718	77.3285	54.7404	34.3905	130.36		53.3095	54.8759	55.4126	11.6447	29.0951	-1.22763	51.4822	35.2518	29.0704		56.9547	55.5047	74.8977	59.4346
	4	41.1699	40.5642	74.3267	76.249	81.4919	49.3489	83.2005	71.5953	43.7823	55.351	100	93.8431	30.7148	61.9559	65.3492	81.2041	79.9823	59.2152	52.2201	76.9907	54.0915	41.2128	53.6752	44.398	49.7299	69.4152	88.9971	51.7596	61.6897	72.9696	36.735	27.9441	121.644		56.8182	49.4891	50.4104	49.0389	15.2204	14.2631	48.4734	34.4639	25.76		34.937	50.5816	72.7963	55.2197
	5	33.5443	46.6367	95.5552	88.0597	80.1957	53.9544	86.5563	99.4943	69.1058	66.4752	96.8656	105.763	55.8407	91.9262	76.8418	87.8366	75.1019	76.8552	67.5172	83.3166	68.9568	48.819	54.6608	60.7931	48.7329	79.84	99.395	64.5058	67.7662	115.201	48.4178	18.2744	115.355		46.9938	69.7157	58.8971	32.7035	41.1137	14.9738	69.878	39.3628	38.6875		34.373	73.0841	57.7943	73.6972
	6	41.8792	40.6613	90.5562	103.265	96.7728	84.0374	100.256	88.5244	80.5061	92.5003	101.723	117.334	51.433	94.3431	75.7938	102.387	79.1538	102.036	58.6366	84.873	35.2147	68.4375	67.3188	64.0044	50.2873	83.7025	88.8741	80.0124	61.4727	100.281	71.1004	37.8151	124.188		62.5453	55.8664	66.1697	49.9574	40.464	26.6848	56.904	60.5002	39.5937		47.1104	67.0065	54.1983	121.253
	7	13.9688	31.5121	129.989	95.0704	94.0243	67.9289	123.232	74.8119	70.9816	113.923	103.297	81.9355	66.3062	111.478	77.9473	99.3975	89.3289	92.5265	53.9712	61.9917	95.5899	67.5059	61.1858	57.5229	43.2768	61.081	133.357	87.364	57.4154	80.0254	44.5891	37.0957	86.9845		58.5159	57.7257	54.0285	38.9359	46.5429	29.2369	58.3478	65.8102	38.5487		25.111	21.0866	55.839	90.6846
	8	21.4307	70.1979	128.412	94.2967	86.9655	113.07	100.976	88.5549	76.5201	118.121	109.59	82.4161	58.8631	121.324	75.8786	104.886	96.6779	92.6118	62.6892	77.2417	91.845	92.6288	69.3132	81.1581	54.3484	86.4298	111.598	76.7928	77.532	131.841	49.7837	66.2772	100.146		50.7968	65.441	56.0682	61.5692	43.109	23.0503	61.0941	53.1346	43.7299		48.4751	57.0731	52.243	114.229
	9	10.845	19.9663	131.903	105.35	106.99	97.8486	99.2466	71.1569	86.554	118.629	122.652	100.26	55.0808	108.515	84.9195	98.8294	109.708	94.08	45.7786	104.692	92.7209	92.6198	92.1389	68.2468	64.9263	93.2135	88.0537	60.0294	55.3585	108.714	47.4968	100.236	111.041		42.2628	78.8038	59.7106	30.637	57.355	29.7538	63.7494	91.7095	48.3996		41.8699	50.2549	50.254	156.42
	10	10.0128	20.776	124.876	108.95	109.005	100.266	89.5585	68.2666	71.4263	120.398	123.452	44.5545	51.2984	95.5548	74.3654	97.1448	86.0318	76.4363	58.1739	91.3495	52.2761	79.2977	63.1859	77.6596	68.9141	96.1485	134.506	75.2605	75.5317	98.7997	46.4	17.1233	118.997		14.397	76.2146	43.7206	68.5233	41.9258	16.4599	60.0036	50.6338	45.6007		36.9568	42.8049	54.1983	136.751
	11	16.7517	5.66765	99.5055	93.0809	90.8892	87.8754	92.2585	43.783	99.2885	125.555	126.449	73.6687	37.6846	109.266	69.1062	92.0716	102.421	76.5512	68.1051	96.3827	49.1406	83.0603	73.0137	70.0218	51.5932	48.4688	140.474	67.3695	82.8065	86.1627	56.6961	51.6864	181.778		35.2454	82.6962	42.6521	70.9178	63.8051	27.0886	80.6106	78.1775	49.6492		51.8233	45.1575	53.4229	92.9837
[truncated: 37 more columns]
