# Supplementary material for: Dynamics and nanoscale organization of the postsynaptic endocytic zone at excitatory synapses
Source: eLife. 2022 Jan 24;11:e74387. doi: 10.7554/eLife.74387 (PMC8813055; doi:10.7554/eLife.74387)
Supplement: Figure 5—figure supplement 2—source data 1. [file elife-74387-fig5-figsupp2-data1.xlsx]

## Sheet: Figure 5-figure supplement 2B
	Eps15	Itsn	Dyn2	Hip1R	B2-adaptin
	66.6667	100	66.6667	81.8182	100
	66.6667	100	90	85.7143	93.75
	71.4286	92.3077	100	90	92.8571
	77.7778	100	100	100	100
	76.9231	100	90.9091	100	100
	75	100	100	100	90
	80	100	100	100	100
	77.7778	71.4286	100	100	100
	100	100	63.6364	87.5	100
	100	100	71.4286	100	100
	83.3333		91.6667	100	100
	100		100	100
	75		100	100
	83.3333
	100
	87.5
	100
	100

## Sheet: Figure S5C
	Eps15	Itsn	Dyn2	Hip1R	B2-adaptin
	100	87.5	69.2308	100	88.8889
	100	100	85.714	100	100
	100	77.7778	100	100	94.1176
	100	100	100	100	100
	87.5	69.2308	75	100	100
	100		77.778	100	100
	100		83.3333	100	100
	100
