# Supplementary material for: Dynamics and nanoscale organization of the postsynaptic endocytic zone at excitatory synapses
Source: eLife. 2022 Jan 24;11:e74387. doi: 10.7554/eLife.74387 (PMC8813055; doi:10.7554/eLife.74387)
Supplement: Figure 5—source data 1. [file elife-74387-fig5-data1.xlsx]

## Sheet: Figure 5C
	PSDs associated with long-lived structure
	Clathrin	CPG2	Itsn	synd2	synd1	Amph	picalm	Fcho	epn	eps15	dyn2	B2-adaptin	Hip1R
Neuron 1	77.7778	33.3333	80	18.1818	80	0	21.4286	0	8.33333	56.25	15.3846	92.8571	11.1111
Neuron 2	57.1429	80	71.4286	41.6667	55.5556	66.6667	0	50	0	87.5	63.1579	64.5161	60
Neuron 3	44.4444	90.9091	50	40	61.5385	16.6667	0	12.5	50	54.5455	62.5	22.2222	73.5294
Neuron 4	50	84.6154	27.2727	92.3077	37.5	22.2222	0	40	87.5	92.3077	80	93.3333	90.9091
Neuron 5	66.6667	33.3333	60	92.3077	33.3333	16.6667	0	40	50	57.1429	100	80	42.8571
Neuron 6	45.4545	68.75	83.3333	83.3333	76.4706					50	37.5	75	85.7143
Neuron 7		70									33.3333
Neuron 8		76.9231

## Sheet: Figure 5D
	Raw data																Histogram data
	Clathrin	CPG2	Itsn	Hip1R	B2-adaptin	eps15	dyn2	synd1	synd2	Amph	Fcho	epn	picalm				Bin Center	Clathrin	CPG2	Itsn	Hip1R	B2-adaptin	eps15	dyn2	synd1	synd2	Amph	Fcho	epn	picalm
	1	30	30	9	30	30	5	30	30	16	12	5	2				2	0.333333	0.257732	0.389937	0.270588	0.282051	0.292208	0.351598	0.324138	0.343434	0.373494	0.4375	0.473171	0.581197
	1	30	30	6	30	26	30	23	13	20	30	3	26				5	0.125	0.0515464	0.100629	0.1	0.0769231	0.116883	0.136986	0.0896552	0.10101	0.208835	0.125	0.121951	0.17094
	27	18	30	22	30	28	30	30	3	2	30	16	2				8	0.0902778	0.0618557	0.100629	0.0647059	0.0717949	0.0519481	0.0821918	0.103448	0.0858586	0.100402	0.125	0.0731707	0.0940171
	9	30	12	10	30	30	30	4	13	23	3	4	11				11	0.0763889	0.0515464	0.0754717	0.0764706	0.0358974	0.0649351	0.0776256	0.0413793	0.0808081	0.064257	0.0763889	0.0536585	0.042735
	28	30	30	2	29	7	18	30	6	6	30	2	3				14	0.0347222	0.0412371	0.0251572	0.0529412	0.0358974	0.0519481	0.0547945	0.0344828	0.0707071	0.060241	0.0555556	0.0292683	0.025641
	30	30	11	8	30	15	30	30	30	16	7	30	27				17	0.0486111	0.0412371	0.0125786	0.0352941	0.025641	0.038961	0.0182648	0.0413793	0.0454545	0.0682731	0.0347222	0.0634146	0.017094
	30	7	30	30	30	30	30	30	3	2	7	22	26				20	0.0277778	0.0103093	0.0314465	0.0294118	0.025641	0.038961	0.0273973	0.0275862	0.020202	0.0281124	0.0277778	0.0292683	0.017094
	1	30	1	21	30	30	30	16	9	30	17	30	5				23	0.00694444	0.0309278	0.0188679	0.0176471	0.025641	0.038961	0.0365297	0.0275862	0.020202	0.0401606	0.0416667	0.0146341	0
	30	30	20	22	30	30	30	30	30	11	30	12	1				26	0.0138889	0	0.0188679	0.0176471	0.0307692	0.012987	0.0136986	0.0413793	0.00505051	0.0160643	0.00694444	0.0097561	0.025641
	6	30	2	13	13	11	27	30	8	23	30	4	8				29	0.243056	0.453608	0.226415	0.335294	0.389744	0.292208	0.200913	0.268966	0.227273	0.0401606	0.0694444	0.131707	0.025641
	30	30	10	7	30	8	30	30	2	29	1	4	1
	30	30	5	1	6	17	1	2	28	5	7	2	11
	30	30	9	1	30	21	1	5	4	13	1	3	3
	22	8	2	6	30	1	1	1	9	5	2	7	2
	1	3	2	5	30	1	1	1	5	30	3	5	2
	10	7		2	3	24	5	3	21	30	10	1	5
	4	7	24	2	6	5	3	1	1	30	5	1	11
	2	1	30	5	1	2	8	1	1	2	2	1	4
	10		30	13	7	1	11	4	23	28	15	1	2
	13	30	30	11	6	5	8	11	2	10	3	23	2
	7	30	30	8	12	17	4	1	4	2	1	1	1
	1	30	24	1	1	7		1	14	1	4	1	1
	4	30	30	1	1	15	28	1	20	13	2	20	1
	4	30	30		2	6	30	8	6	4	1	12	1
	4	22	30	30	2	11	8	4	18	13	7	6	1
	3	30	1	30	8	8	2	10	1	23	1	5
		30	29	2	7	8	30	11	12	1	4	16	2
	30	30	21	30	4	8	27	8	14	1	1	1	6
	30	30	30	30	2	6	2	4	2	2	1	16	2
	20	30	30	10	3	4	30	2	1	21		8	4
	17	13	30	30	2	4	30	1	11	17	21	1	2
	10	30	30	2		2	11	3	2	16	2	5	1
	30	30	30	30	1		30	1	9	16	14	1	1
	30	30	30	8	24	30	30	1	6	1	11	4	1
	1	3	30	6	30	13	5		1	3	27	2	1
	1	30	30	12	30	30	30	2	3	14	1	1	1
	4	30	20	2	23	30	8	13	3	11	1	2	5
	11	30	1	4	30	30	30	7		1	1	2	1
	10	30	5	14	30	30	6	30	1	3	1	2	8
	8	30	1	21	19	30	30	1	17	10	1	2	1
		30	1	17	7	30	6	17	15	8	1	3	1
	19	30	2	2	30	2	1	30	17	7	6	1	6
	11	1	2	10	30	2	1	24	14	7	2	2	1
	15	1	1	5	30	17	12	4	30	7	13	1	10
	30	1	1	3	23	3	7	10	14	1	1	1	1
	30	13	10	3	5	1	24	2	6	4	2		3
	30	12	10	1	7	2	1	1	30	2	1	4	5
	17	4	7		30		3	30	10	1	1	16	3
	30	1	5	28	30	30	10	30	30	1	3	2	3
	2		4	30	14	4	11	30	30		1	19	4
	5	24	1	30	30	30	7	16	29	5	1	25
	5	12	2	28	12	20	2	26	1	15	3	26	30
	7	30	1	30	29	28	13	26	1	5	3	2	30
	1	30	1	30	1	30	18	4	1	6	1	10	7
	2	19		30	30	1	19	24	9	6		6	2
	9	4		30	27	5	1	5	1	1	13	1	30
	7	1	30	27	30	17	17	8	7	2	4	1	1
	3	1	15	30	30	2	15	20	2	2	24	3	1
	2	14	3	30	9	30	13	1	1	21	30	2	2
	1	11	28	14	28	30	1	1	8	2	24	2	2
	1	1	11	30	30	30	12	1	6	1	21	1	1
	1	1	28	12	30	10	3	16	2	14	8	12	21
		2	2	30	28	15	10	7	17	2	12	12	8
	30		30	16	20	14	9	10	8	4	9	3	2
	1	30	3	30	30	30	6	1	7	1	7	1	8
	14	30	30	29	28	30	3	7	3	2	13	14	1
	30	30	2	7	1	1	2	8	9	5	1	1	1
	6	22	5	19	13	6	6	3	13	1	5	1	2
	30	18	1	30	4	26	1	7	13	7	24	1	4
	18	30	11	30	5	2	5	3	12	2	10	5	7
	1	1	9	12	1	13	1		1	6	1	4	3
	30	5	5	9	14	9	2	28	11	2	11	10	3
	30	1	14	30	11	1	3	28	9	2	4	2	7
	7	2	1	30	2	1		28	5	6	17	5	5
	8	12	6	30	9	18	4	28	3	9	1	8	1
	3	1	7	30	15	5	30	28	1	7	1	1	1
	4	5	1	30	1	1	7	17	5	7	1	6	19
	1	1	1	30	1	16	30	11	2	6	4	5	1
	2	3	4	15	2	13	28	28		1	7	1	1
	16		11	30	3	10	30	28	4	5	18	1	3
	14		1	28	1	9	13	22	3	1	4		2
	1		4	30	1	1	13	3	10		7	12	16
	9	16	7	1	6	1	4	28	30		10	28	9
	2	30	7	19	8	2	30	2	24	14	15	29	4
	6	30	2	23	1	3	12	3	10	19	2	21	1
		17	2	2	7	1	30	2	28	24	13	30	1
	2	30	2	16	7		30	13	11	6	4	1	8
	8	2	1	1	7		8	3	20	6	1	1	1
	30	28	1	8	6	29	4	7	2	4	2	1	1
	25	30		10	5	29	30	3	3	1	3	2	9
	30	10	15	4	5	28	30	9	2	28	6	17	2
	11	30	7	4	3	30	23	5	17	4	1	2	1
	8	30	30	1	3	30	30	4	11	16	3	2	1
	18	3	29	7	1	19	30	3	9	26	7	12	4
	30	9	21	1	2	21	5	1	1	19	7	2	1
	30	15	7	3	1	30	1	2	1	2	7	1	6
	30	1	3	3	1	3	28	1	3	10	5	2	4
	3	3	27	3		22	27		23	1	5	1	5
	5	1	9	2	26	30	1	27	17	7	1	1	4
	30	4	3	2	30	3	6	9	17	18	4	1	1
	30	7	7	1	6	30	15	28	9	3	6		2
	30	1	1		16	1	1	28	13	16	3	30	1
	28	2	7		18	30	1	6	15	1	2	18
	3		2	30	3	30	24	2	1	8	4	30	13
	28		4	30	30	30	1	28	16	5	4	28	1
	12		1	30	26	29	10	2	1	17	1	30	2
	17		4	30	1	2	24	26	1	14	1	30	7
	2		1	30	5	10	3	8	13	11	1	17	1
	2		1	30	7	2	1	21	1	4		30	6
	7		21	30	18	1	2	3	5	12	30	30
	11		16	10	1	23	19	3	10	1	30	30	5
	1		22	28	13	6	18	13	7	12	21	30	14
	8		12	3	2	3	9	1	1	12	21	30	1
	4		1	30	7	2	1	9	10	1	8	30	1
	5		1	30	3	6	13	2	10	1	10	30
	5		10	27	4	12	1	2	2	7	7	30	18
	1		1	2		12	5		6	9	1	30	13
	1		1	3	30	5	14	17	4	3	3	1	1
			2	1	30	1	1	20	4	1	1	22	11
	30		4	1	30	4	7	1	4	2	23	1	1
	3		2	2	30	2	3	28	3	6	2	1	4
	1		2	1	20	3	1	2	1	7	12	16	2
	19		1		30	1	1	28	3	6	18	1
	30		2	12	30		4	9	1	3	2	15
	6		10	30	30	6	3	4	2	4	16	13
	16		3	30	30	30	1	9	1	2	10	1
	30		8	18	30	30	1	3		2	2	8
	12		2	30	30	30	1	1	30	2	11	1
	30		8	6	30	13	2		30	2	7	1
	2		8	16	30	3	1	28	30	1	2	3
	11		8	11	30	28	1	28	30	1	1	2
	30		4	27	30	24	1	28	30	2	5	4
	1		5	1	3	3		28	30	1	1	4
	1		1	13	2	2	20	28	30	1	3	1
	1		3	7	20		2	28	30		2	4
	19		1	19	18	2	8	28	30	22	2	2
	4			11	12	30	10	28	30	1		3
	1		29	4	10	11	14	14	30	10	2	1
	1		18	12	2	2	6	28	1	30	30
	15		28	5	3	30	4	25	28	5	30	13
	1		25	1		30	12	28	3	30	23	19
	3		30	6	30	30	28	28	3	17	22	30
	2		10	9	24	21	7	28	2	3	13	30
	2		1	3	30	30	12	28	1	1	2	30
	4		15	5	30	30	20	4	3	7	7	19
	3		1	4	10	23	28	25	1	3	8	30
	3		1	2	30	5	13	21		1	8	16
	1		2	1	30	28	3	13	30	17	2	17
	1		1	1	30	23	21	3	29	10		30
			8		30	10	24	1	30	2		7
			3	30	30	21	24		9	16		30
			1	30	30	5	2		30	5		30
				30	30	1	9		10	15		30
			4	30	25	12	22		30	1		8
			30	30	30	2	1		30	1		16
			30	30	30	1	9		30	2		1
			4	30	2	6	4		30	24		21
			30	13	2	1	15		30	3		1
			30	30	3	1	2		16	19		1
			30	30	1	1	10		26	24		1
			1	30	19		5		30	14		1
			1	16	1		1		30	22		8
			25	30	1		11		30	3		15
			1	30	2		2		1	1		1
			2	1	1		3		3	19		1
				1	1		10		1	1		18
				1			4		2	1		1
				15	30		2		14	10		1
				3	30		6		9	8		1
				15	30		3		1	11		17
				5	30		3		2	2		1
				1	30		3		1	6		1
				1	30		3		1	15		7
				3	30		1		1	7		4
				5	2		2			13		1
				1	2		2		30	12		15
					30		2		30	3		2
					12				30	2		7
					9				13	5		8
					30		30		19	1		1
					3		30		30	5		8
					30		30		30	9		12
					30		30		5	2		6
					16		1		30	2		11
					30		28		1	1		10
					25		30		30	6		2
					30		28		30	6		2
					30		11		30	2		7
					30		1		30	3		1
					27		1		1	4		8
					2		9		5	1		8
					2		1		23	3		1
					23				8	4		2
					13		4		2	1		2
					1		9		1	1		6
					1		14		5			7
					1		29		11	5		5
					2		30		11	3		5
					6		30		10	22		2
					2		22		1	8		3
							11		1	9		4
							20		5	27		1
							9		1	5		1
							4			30		2
							2			3		2
							5			6		2
							3			4		1
							3			4		1
							5			1		1
							3			13
							4			1
							2			15
										17
							30			7
							30			4
							4			5
							1			26
							5			17
							5			25
							2			1
							1			18
							1			18
							2			22
							1			5
							1			5
							1			13
										11
										4
										1
										9
										8
										2
										1
										16
										5
										1
										11
										2
										6
										5
										5
										8
										8
										7
										2
										2
										5
										5
										4
										1
										4
										4
										2
										1

## Sheet: Figure 5E
	Fluoresence recovery after 10 minutes
	Itsn1-L	Synd1	Cpg2	Dyn2	Hip1R	B2
	85.1578	154.323	26.8859	10.0128	61.4567	45.6984
	146.259	52.815	58.132	20.776	52.1209	46.8939
	133.378	114.352	50.2032	124.876	52.4321	59.6072
	72.0614	114.546	49.9044	108.95	48.694	41.0787
	35.4883	130.404	22.3431	109.005	85.2825	54.2561
	119.21	119.666	18.3542	100.266	21.4362	40.5745
	95.7411	87.7115	30.7213	89.5585	80.3842	72.3672
	81.0744	97.5396	10.0047	68.2666	48.0438	82.7516
	96.6607	15.888	27.9969	71.4263	43.4271	79.4549
	81.5138	111.99	11.3141	120.398	52.742	57.4999
	42.4476	81.51	9.38055	123.452	36.3033	56.848
	88.5644	88.2241	31.0811	44.5545	41.4509	49.4934
	77.5506	79.6867	54.2166	51.2984	74.1709	50.296
	208.452	71.4021	49.0939	95.5548	21.7726
	59.7459	252.82	13.8766	74.3654	46.0339
	76.1001	89.328	32.0453	97.1448	23.9059
	58.3307	59.9677	18.1684	86.0318	60.7994
	95.7616	68.8945	22.0171	76.4363	136.915
	118.643	99.7911	42.8802	58.1739	85.0998
	105.855	69.538	40.3147	91.3495	40.8843
		73.7577	8.75234	52.2761	68.754
		199.137	18.6481	79.2977	18.4297
		66.2065		63.1859	201.222
		107.192		77.6596	96.2094
		74.4677		68.9141	79.8481
		73.3015		96.1485	31.0631
		46.4927		134.506	64.8692
		62.5634		75.2605	88.4796
		80.5309		75.5317	64.2137
		70.015		98.7997	93.6505
		68.3841		46.4	65.0311
		92.4382		17.1233	26.027
		77.7337		118.997	68.7456
		76.2056		14.397	79.2974
		90.9088		76.2146	46.8829
		124.359		43.7206	39.6467
		42.8319		68.5233	57.7247
		40.8129		41.9258	6.87216
		51.8496		16.4599	-7.39257
		81.7298		60.0036	38.9055
		64.5226		50.6338	73.1112
		102.064		45.6007	73.1112
				36.9568	66.4799
				42.8049	50.5543
				54.1983
				136.751
				-43.8829
				75.1495
				77.5056
				36.0144
				45.1424
