# Supplementary material for: Dynamics and nanoscale organization of the postsynaptic endocytic zone at excitatory synapses
Source: eLife. 2022 Jan 24;11:e74387. doi: 10.7554/eLife.74387 (PMC8813055; doi:10.7554/eLife.74387)
Supplement: Figure 6—source data 1. [file elife-74387-fig6-data1.xlsx]

## Sheet: Figure 6F
	RAW data (distance in nm)								Histogram data representing relative fraction
	B2	Eps15	Itsn1-L	HIP1R	Dyn2				Bin Center	B2	Eps15	Itsn1-L	HIP1R	Dyn2
	217.24	-11.6011	108.602	34.3283	145.297				-250	0	0	0.000155687	0	0
	181.863	-53.1862	-30.0359	20.1089	145.092				-200	0.000392025	0	0.000826337	0	0.000859499
	-36.1401	13.5148	-22.9164	14.4324	52.2094				-150	0.0077845	0	0.0142633	0.00750891	0.0159879
	37.7049	-56.4087	10.4864	9.01323	18.2248				-100	0.0673163	0.0107733	0.0742386	0.081721	0.0612348
	-25.7734	-50.3467	-3.41853	637.01	-36.8246				-50	0.170979	0.185376	0.240596	0.19145	0.17178
	-41.2303	6.67334	-25.1395	1.27341	-55.3085				0	0.193492	0.257569	0.283158	0.211126	0.216317
	-19.1816	-1.84507	-29.3914	-0.16836	-23.0328				50	0.134969	0.222401	0.180597	0.152316	0.170265
	26.8977	-49.5519	-7.89674	-21.7754	48.1325				100	0.0972782	0.113058	0.0873403	0.102329	0.12262
	6.42833	-38.0997	8.91418	715.174	21.6004				150	0.0991823	0.0731224	0.0430534	0.0833105	0.0879935
	-64.3519	-45.4225	-14.2347	718.509	-38.7594				200	0.0674843	0.0465606	0.0227901	0.0614415	0.0572679
	-47.3812	13.7914	18.3929	-5.24527	-0.458986				250	0.0565076	0.0327534	0.0171974	0.0497671	0.0382207
	-71.8944	48.9562	432.599	54.279	-60.6541				300	0.0455309	0.0245186	0.0158082	0.0293231	0.0247992
	-70.3686	6.84737	1.85085	15.5318	-34.1073				350	0.0378584	0.0217943	0.012443	0.0176487	0.0186686
	-63.7943	-37.8647	7.06778	21.0868	-32.9755				400	0.0212254	0.0120736	0.00753284	0.0120581	0.0139864
	-71.1623	-33.2789	5.48842	12.2481	-39.1963
	125.425	-16.2946	3.00706	7.17696	-26.1714
	-0.51126	6.71631	47.8664	3.08162	30.0836
	100.882	2.03022	12.3648	-4.99584	-1.3964
	-71.8142	-40.5903	-5.85638	12.4135	42.9148
	-55.3312	18.5641	19.2326	-1.57822	1.76744
	-30.2643	-7.63395	15.9849	14.9658	-30.4318
	-61.7168	39.5575	25.9257	9.06481	-0.882887
	-65.9661	-8.14378	-7.55009	-8.17068	104.922
	-44.4786	25.1264	10.3572	-13.9565	32.6829
	287.433	-22.4889	32.6274	11.8854	163.307
	-86.3948	8.25845	36.8589	4.42739	-26.4948
	126.927	56.8982	53.8291	55.1265	11.7526
	-80.9869	-7.39804	35.8841	24.999	-51.7918
	-42.3666	9.16506	36.1292	7.78235	1.44876
	-25.0853	-11.8833	50.848	19.3604	-17.345
	-30.0667	49.921	47.4459	13.3498	14.7669
	57.5485	64.4561	56.3527	60.4493	144.071
	130.436	-24.4404	54.5501	7.83227	69.3655
	-51.1531	36.5985	70.6417	11.9501	-50.5971
	-44.0114	-25.0574	74.3357	23.8724	-51.157
	-60.7383	14.2855	37.8045	10.6543	-17.0749
	-57.5387	27.5952	31.1371	16.1776	-97.4651
	-6.74179	-13.2392	57.6216	4.76183	51.037
	14.8707	12.5467	83.8115	50.513	185.222
	-26.4716	54.3715	22.1536	34.5767	226.155
	-32.0147	12.8702	-1.32437	11.0157	234.958
	-9.17564	2.87863	8.55391	-13.1342	164.395
	32.3511	9.93927	-0.10017	4.87733	151.54
	36.6881	13.9436	470.717	-17.5487	290.578
	-7.98854	-31.3961	27.0961	10.1648	-101.671
	7.12603	10.9353	71.4778	-24.1939	-15.9504
	-69.0368	4.72525	38.1554	13.161	-59.15
	140.356	37.7164	19.8779	16.6456	-34.6343
	158.269	-54.2278	-21.233	20.8654	-61.5587
	149.145	-48.0032	36.7063	3.42963	-47.5615
	81.1075	16.2714	-5.25182	21.6769	13.4465
	143.969	4.36912	33.4314	29.8117	49.7197
	-12.7364	-35.0783	36.249	6.50413	100.412
	3.11508	33.0366	50.5384	59.8923	-32.5462
	40.9903	2.91947	36.3961	5.52119	-7.39249
	161.457	-54.2148	29.4219	-25.3703	156.025
	3.20981	-4.33379	23.4191	-46.2591	112.965
	-4.91157	30.1827	5.74172	-53.3489	22.4424
	18.3927	6.03749	47.1358	-25.8992	38.7794
	54.1921	-45.8792	51.6915	-19.1353	25.4423
	124.19	6.76792	54.7599	8.86083	-62.8945
	23.4904	-11.6624	41.301	-50.8829	-23.1136
	26.5291	43.0747	-1.74929	-10.357	32.035
	20.2202	-45.8591	14.2572	-29.26	149.445
	33.9328	29.9591	36.5457	2.44979	62.7894
	-81.2683	-1.53742	28.3453	-25.8695	-13.641
	-75.9301	40.1666	46.8404	-0.77834	56.2429
	-69.047	17.6315	70.6151	-49.8136	276.697
	-32.5269	-19.3105	37.3225	-21.6597	215.827
	-55.3337	-23.7288	-9.59633	-35.8362	317.791
	-45.6906	34.949	26.2019	7.44316	46.6107
	272.724	-29.6982	62.9179	12.7803	239.088
	28.8603	49.3995	38.6179	-24.5721	103.076
	-49.78	-23.4664	37.6354	12.8785	314.149
	23.7454	-47.2515	67.2229	28.7517	211.15
	25.3882	-40.7791	50.4337	-13.1159	-56.7556
	-1.30603	28.773	53.0449	-43.7578	-59.4379
	2.83539	-33.2265	50.8994	-37.7009	105.656
	11.173	69.7894	20.8354	-25.9354	189.446
	-39.2084	-44.7436	59.5662	-36.0078	21.2743
	-0.3371	86.8671	1.95104	-15.3023	121.543
	-76.4205	26.3009	35.5107	-46.6438	261.331
	-38.318	-59.513	41.2086	14.4573	169.051
	-53.0467	8.6612	66.3183	-9.10645	194.04
	-38.0206	-28.6467	55.9797	-21.1196	106.953
	72.6785	33.8442	75.3496	8.02113	62.4555
	-20.3838	17.7413	57.1299	12.6619	143.774
	4.25347	-8.64511	80.707	-28.1312	51.059
	-0.72265	-45.9166	42.1327	-16.8482	221.366
	-1.09768	14.9801	84.3901	57.0277	77.3319
	-2.19219	67.0864	45.8478	-18.7256	152.484
	38.5998	-52.9451	77.5787	-5.33816	-3.68164
	48.7333	43.1117	66.8931	-2.522	225.688
	123.107	-54.4448	69.6596	46.9053	-47.947
	54.5078	45.0522	49.1584	-20.9012	255.594
	-49.187	-53.6394	63.6706	2.09727	308.866
	112.856	-50.0934	54.8783	-2.49349	191.689
	-54.8217	-50.5903	29.0343	11.0137	134.647
	-27.7359	7.97633	39.5237	41.5215	-84.9784
	-30.3675	-32.4535	54.6146	21.5288	78.1634
	112.156	51.7619	73.145	-26.8846	141.58
	-43.9801	-38.0557	74.4873	-49.1977	282.956
	-2.07138	36.3585	71.4622	1.46529	3.42811
	-0.65483	22.42	76.4976	-2.65223	491.661
	-28.3486	5.90939	105.623	-1.90391	277.906
	69.5202	-2.38714	62.4396	-19.0326	-58.7046
	-57.1122	59.6084	92.8667	-43.2996	-15.5371
	15.3591	-36.1097	-0.60654	-18.2923	-41.5975
	-25.732	22.7051	41.1069	-1.92321	174.064
	24.1876	49.9874	50.0119	122.121	9.99643
	37.181	-28.8946	39.0153	-0.0296	-0.189655
	-37.1959	56.4491	34.9048	37.531	243.422
	5.79515	-24.7572	36.8412	-29.075	-75.6162
	-38.7177	-26.2535	72.415	23.5345	128.948
	-36.9097	37.5611	88.6179	-6.00767	251.997
	-28.1696	13.0261	51.3126	28.4873	102.336
	26.8761	27.4311	93.3773	-4.19603	227.719
	16.7875	23.6839	34.4133	19.4059	246.591
	146.767	70.7805	56.2647	28.8214	3.06606
	16.0224	-21.4831	29.7121	46.76	240.147
	-37.6097	-39.7512	52.7039	-18.5664	218.779
	-16.0006	6.82793	30.1361	40.068	157.266
	-4.32582	0.070335	56.8532	31.4711	45.8989
	-16.4297	10.1673	54.4147	16.124	80.9043
	-21.1699	76.2373	17.3098	42.6514	265.929
	-69.6496	20.8564	41.0444	-29.3298	269.439
	-11.2676	-44.3697	32.6963	30.7067	5.41916
	-21.9641	80.0462	40.691	66.148	267.26
	-16.8727	-51.3511	25.989	-4.63694	97.1318
	14.9693	26.7502	8.47796	-7.31226	-30.0748
	-46.0114	-32.3376	47.5383	-51.5267	303.431
	76.9267	7.7511	-11.1671	-0.04664	-91.9023
	-28.9162	44.2402	48.8753	-47.0386	-38.5012
	99.9163	51.1875	37.3013	36.6842	72.9509
	9.14475	33.1418	33.5291	-28.751	171.886
	74.7153	-5.07591	55.0693	-39.455	-5.07887
	-76.8719	26.4365	46.0427	142.166	76.9817
	-75.7223	40.5582	50.8563	-28.7464	221.11
	-79.1269	46.0999	74.7209	34.6961	155.947
	-57.1458	27.1663	33.0622	-29.2836	194.1
	-55.4448	-53.5214	38.5006	9.40324	190.179
	-13.4091	9.11848	37.6617	-7.50012	190.557
	72.1839	-21.5875	46.8557	28.4569	46.8398
	-25.2918	68.9111	16.714	14.3487	121.989
	-78.054	-15.0763	70.7866	27.5245	266.422
	-47.2747	70.4104	75.6302	4.91781	153.918
	-24.2922	28.1814	75.462	25.2767	243.368
	-11.5597	67.5436	64.993	-23.936	300.273
	-29.0949	83.642	67.6621	-41.2212	231.928
	-3.36114	-15.4535	78.9176	-40.806	89.973
	31.0146	40.0915	59.9292	-51.5066	31.3493
	-38.6477	-20.085	26.1985	-19.1275	215.602
	-12.2586	-43.1077	85.4379	-0.90824	115.25
	18.5919	-42.9494	59.9167	-28.6348	443.608
	-15.809	38.72	73.6682	-37.0724	64.4368
	-24.1569	44.7705	74.7859	-43.699	524.054
	70.3069	-38.3927	106.325	-45.8054	487.837
	-34.6029	50.1103	62.4031	-57.6324	168.588
	-63.6289	-14.3206	38.1713	-32.35	205.952
	-29.217	-10.7174	46.3325	-57.2821	93.5519
	83.527	-25.5063	32.3375	-32.9702	21.7252
	25.0739	-21.9563	54.0655	16.7923	34.4191
	-36.8956	47.3711	61.9002	-45.9519	-42.8699
	12.1946	-22.7604	30.0154	-19.0941	17.0181
	40.7046	6.35953	47.1688	-24.8027	268.685
	-3.91957	-51.4159	69.98	56.1587	-35.5715
	-22.444	39.0145	34.2545	20.5629	-55.219
	18.5175	48.5318	-15.5505	-11.0703	-86.4548
	-68.7918	-35.0552	-27.8222	-45.6119	79.1929
	-43.5608	25.9189	41.7359	-41.7429	-14.1284
	-52.8979	-40.5131	53.9941	9.64132	-14.2965
	94.6633	-19.8071	40.092	-48.2016	-31.7902
	-11.1967	45.4899	42.6041	-47.1608	146.463
	-66.1861	-51.0323	6.74596	-22.6605	53.9835
	111.511	-27.6144	37.3992	-38.7135	67.1618
	-2.24947	7.27285	34.9056	-36.9922	102.147
	79.9284	-41.1429	-2.61966	-30.1677	53.68
	7.19768	-52.4061	15.734	-52.0363	109.788
	-5.51907	-54.3589	76.4501	-38.5911	226.819
	-19.4645	-40.2136	-3.07054	-36.509	87.0633
	28.6434	-52.3531	50.4812	-55.1876	190.495
	16.2618	-8.25382	19.2594	5.81077	167.133
	51.8539	-42.0485	0.459427	-39.917	262.182
	2.36156	-22.535	38.67	-32.8152	81.9278
	28.7713	-18.0534	4.849	-43.1159	22.8537
	35.1849	18.0405	61.4371	-56.8646	77.0378
	-27.0296	-26.4775	14.6628	-12.4485	134.253
	73.0507	11.0823	30.9675	-22.6448	314.046
	25.2572	-29.3967	21.3041	13.3582	258.852
	-24.559	-15.1214	9.41105	-4.30878	186.926
	384.732	-48.7278	21.1068	38.7039	258.289
	-63.1202	-48.4344	-27.1054	61.7953	569.884
	-48.4072	21.7277	177.304	-50.3037	101.342
	-13.8995	-48.8614	262.212	-45.5688	44.7458
	60.5517	7.75024	165.039	-18.2891	9.06301
	-4.63893	-41.9109	200.688	7.58081	160.742
	-30.6195	-42.4292	189.829	-17.2865	8.74578
	-35.8786	9.33507	124.654	63.8599	100.408
	-45.7746	81.962	205.752	21.2899	159.178
	121.978	-3.32265	237.254	-20.5785	-3.36993
	-77.4234	5.75612	292.661	-49.0536	200.517
	66.1762	-61.4099	340.526	-25.1927	264.907
	13.9341	-49.0035	218.316	-39.8398	94.6216
	55.7729	74.4036	363.699	18.9111	35.1549
	-35.2591	-23.9441	270.084	48.6558	266.525
	26.871	77.6669	370.178	-43.6979	-13.7653
	30.5082	-42.7636	304.244	48.6106	30.697
	36.3447	8.29541	377.075	32.9181	-82.9072
	53.9617	-62.1938	394.673	-12.0208	-37.0795
	-3.57766	-5.26065	333.922	-7.70595	-20.7917
	-30.5353	-24.4968	263.544	-12.8855	-35.7914
	-28.3312	15.9882	184.372	42.0051	-11.3232
	-59.9412	20.826	236.605	-15.5204	-90.0799
	-84.3373	-35.8075	206.143	-45.2117	14.8806
	-60.0134	-62.3687	259.688	6.17941	37.1116
	-19.8364	-1.05079	335.767	-42.4439	-31.9175
	-48.2311	-38.7121	172.71	-1.4439	-78.0822
	70.5378	-0.08837	279.757	-24.515	19.2397
	-76.3218	-64.0781	394.755	-35.251	-69.6306
	-28.0471	-40.3816	301.078	35.7416	-46.2184
	-63.1727	-0.80409	372.464	-41.4339	25.891
	-12.9727	17.9401	204.922	-35.7776	27.5616
	-86.1624	-32.6292	93.3433	-49.754	406.185
	116.426	52.391	208.384	-50.8042	48.2933
	-57.7586	22.1996	361.882	87.9363	295.238
	-31.5755	43.2089	355.758	24.548	4.34933
	-76.1312	107.737	336.21	14.3088	-44.4653
	-82.6545	-41.7462	404.456	14.3767	442.089
	-51.2857	10.1701	326.96	73.6994	116.227
	-9.88394	-19.1243	431.244	81.5851	29.1261
	5.5789	-13.7087	289.121	21.2382	34.2498
	-53.1996	1.54175	211.169	46.0001	1.04422
	15.1289	54.0351	225.875	50.0567	18.7108
	181.032	-34.1147	289.749	-35.9095	-10.7498
	-25.1371	58.0752	299.971	-1.27004	19.3422
	7.94867	-32.3536	357.784	53.5984	-20.0524
	60.6455	-37.8583	370.073	-3.97851	62.0046
	-56.2883	-18.5244	294.874	34.7554	-51.9227
	154.789	-37.013	322.481	91.8417	-19.4216
	165.839	25.741	383.675	79.4742	5.81154
	405.218	21.3293	358.523	16.7402	-27.7456
	435.551	1.29616	396.797	68.7554	45.6914
	450.433	35.9858	374.047	-46.4756	33.6508
	1.97056	-19.4985	375.878	-6.34051	327.043
	-19.8008	2.37941	297.055	-46.5509	319.957
	-0.67684	-10.0505	3.6492	10.0207	-4.94131
	-77.2877	-26.6225	-4.40391	-38.3566	-38.0175
	-79.9397	20.454	15.9922	-52.8473	-45.8079
	5.5634	-50.1296	-4.20154	-38.3846	-22.7242
	95.6727	-34.7667	-25.7609	-3.32076	146.43
	46.5049	-65.2562	-4.30283	-6.31284	94.1002
	-47.3171	23.6144	-20.4992	-51.3321	-38.5492
	13.131	99.3715	31.4329	61.3109	-21.0185
	45.9565	0.18526	-45.0339	34.187	56.7489
	20.5918	-13.7028	-38.9616	93.3656	77.9919
	83.9141	-23.4626	-15.6163	17.279	376.817
	4.89692	115.634	49.4472	64.1478	44.4178
	91.0082	52.8243	61.0213	-49.9791	10.9637
	28.4226	29.8336	-33.1146	23.7813	5.81893
	103.277	-19.7115	3.06507	48.8472	-25.7633
	104.873	-1.31461	25.4488	-49.227	28.6299
	162.56	22.799	-28.3311	-37.0122	-21.4358
	47.844	-1.04276	9.41427	69.3577	-31.7616
	-61.0595	43.2976	34.4637	27.1614	-51.7395
	122.743	103.634	29.4862	-8.21163	12.0728
	-50.0465	33.9396	-0.65816	7.25248	186.718
	-79.9974	38.5092	61.4745	-46.6659	181.583
	-79.2875	-20.1357	81.2096	15.8018	221.435
	-4.12201	26.2162	61.1424	-41.4062	135.053
	56.2259	47.2777	0.05228	-25.0287	253.446
	126.882	-14.1894	40.6664	-17.3173	265.506
	-60.5973	461.45	-36.3296	-54.1877	209.811
	11.0305	404.563	-10.899	-47.0679	330.81
	-18.5188	210.037	26.8542	-30.9484	129.856
	6.67783	53.2115	11.4012	-50.3447	264.288
	-76.8226	65.206	1.96516	-21.8607	155.328
	43.1756	-17.6483	13.8928	-8.99268	39.7439
	125.922	185.795	19.7931	-1.9741	135.244
	11.3407	117.689	29.5789	54.497	95.9461
	-50.6289	22.4522	-26.5267	-36.9325	68.245
	-29.3507	78.0799	2.47928	33.979	114.219
	63.6895	-6.5987	8.7373	53.2462	64.084
	-2.60708	94.994	-0.11349	15.5465	218.024
	-32.6758	163.356	-17.1926	-26.3579	23.6871
	-21.0141	124.594	-7.18193	66.7496	6.97077
	-18.8111	23.5212	-28.1612	58.8533	61.3156
	-62.7591	147.487	-37.9807	76.2782	-8.30214
	21.8956	48.9215	-24.5888	79.6178	-15.4324
	-31.4558	-14.2582	-32.6671	-35.9686	90.6947
	248.9	131.595	432.557	65.9647	198.037
	68.8852	172.752	401.844	52.6408	43.3554
	27.4678	13.4979	423.356	-12.1856	93.5166
	60.7587	53.1309	386.519	47.7655	53.066
	63.737	98.9242	370.719	-11.7022	287.161
	73.3171	44.5185	-29.3214	-6.17869	20.5649
	-51.7326	62.2667	5.89016	-0.92084	-21.257
	-50.733	20.2246	41.1676	78.0666	39.0737
	115.971	82.8034	-8.9011	62.7355	137.927
	-27.5826	80.4309	-5.49487	47.5945	-6.27029
	0.273269	154.693	-18.576	33.2944	-5.37369
	10.5934	55.3794	-13.7485	43.7939	-2.88372
	-30.8038	49.9957	17.212	64.7542	51.5985
	82.8522	11.4527	34.1718	103.443	-83.3021
	67.9845	-21.7371	43.5106	97.6129	175.053
	60.8655	29.5195	48.6677	87.6321	49.4455
	148.902	131.087	-15.929	104.566	251.882
	66.5891	138.58	11.8638	82.6274	146.482
	150.579	136.464	-24.5589	59.1828	200.454
	88.4799	1.02694	-39.1228	-41.4991	28.061
	-13.0923	96.0097	59.9578	25.8528	58.3297
	-21.31	33.7599	6.31014	4.4176	103.706
	56.2715	69.1867	0.720468	-12.7287	53.6908
	-26.5555	90.7591	-30.1129	-30.612	4.05124
	75.2514	193.298	399.976	-3.88455	183.717
	-32.1817	24.6525	414.497	-10.6469	265.362
	58.0838	67.3013	426.859	10.3567	65.5897
	-69.5647	-23.7269	387.937	96.3446	-5.11914
	29.3904	39.9464	398.392	21.9583	50.5902
	15.6989	-29.5265	422.192	18.4154	572.877
	15.5285	5.75835	423.834	86.741	630.459
	-6.20417	-37.9323	5.62372	-15.7171	-31.7367
	-39.4234	14.8496	-24.5354	92.525	275.165
	-55.3984	-0.55734	-33.0603	58.2412	-56.5697
	47.842	62.7127	-26.4855	93.2137	51.2712
	-76.6345	25.4077	-16.0317	41.3573	246.722
	-27.7716	56.7032	6.19137	8.65088	224.39
	-75.2718	91.5786	-33.2441	62.3917	88.4808
	-67.595	63.0134	14.9699	69.6806	220.952
	-47.591	71.7748	-31.0635	47.0039	109.207
	-78.7253	130.724	-35.8338	81.2481	213.241
	-15.0421	107.146	28.1231	50.6103	78.2728
	41.0735	106.977	-11.0924	82.4082	80.5626
	-7.63508	-8.82584	-38.7222	-6.3497	275.92
	7.19259	16.8557	-46.8001	7.57405	96.6408
	-57.6748	95.2337	-27.2398	65.3254	221.079
	-43.8647	-37.4935	-43.236	-34.9105	117.627
	3.6889	-23.2779	237.051	-34.7045	204.668
	-17.9	6.35078	87.9749	99.895	4.51681
	15.1253	-41.7846	92.4512	1.66694	221.341
	-83.7851	99.179	138.94	19.9223	193.581
	135.689	11.4283	111.12	-12.2082	161.076
	83.4124	-26.2162	-49.1632	46.2502	229.569
	-11.694	-5.41332	36.4055	22.1087	93.1403
	-75.4133	-1.58682	-36.8634	20.9737	224.019
	-44.8177	-11.3205	-50.539	84.0563	192.459
	65.4459	20.7817	-46.8179	40.618	284.229
	-43.4701	-28.6622	1.91569	92.0791	124.855
	111.011	-7.94178	-59.9736	69.0613	281.753
	42.2277	-0.00776	24.3568	-15.1621	61.4313
	92.6402	-29.5995	-67.9545	-22.9253	-102.905
	0.255717	-22.9849	16.4511	84.9621	69.9466
	99.4494	-14.2886	-34.3998	90.1034	201.908
	76.2157	-36.1254	-46.5666	-0.49206	136.31
	-31.0355	139.873	31.2594	17.5134	110.492
	-11.9236	-13.9676	-25.6207	44.0951	64.1909
	42.4948	-50.7837	85.454	51.2259	124.457
	102.502	-59.9191	40.4251	62.5094	50.5338
	-57.024	71.5175	47.313	51.5294	132.616
	115.987	-43.4535	38.8485	74.5795	246.754
	98.7507	-43.836	87.8516	19.593	110.892
	105.422	-42.5858	67.0602	27.9859	48.911
	214.474	-55.9794	88.1897	32.2957	641.493
	-15.6087	-40.0713	62.8445	92.9271	311.347
	-49.4939	312.139	2.49356	58.2422	360.509
	95.7304	-22.9563	13.5622	70.0359	257.74
	242.477	18.0666	-35.2571	49.8018	240.191
	113.352	-42.1797	-16.6934	64.1008	197.869
	113.518	-54.1895	-15.6605	32.1445	20.6093
	169.104	-37.3233	52.1735	17.3105	81.8457
	-27.3248	-54.2678	51.1031	6.8251	266.601
	-54.7431	-18.5678	101.149	6.29768	126.804
	15.8021	302.298	-51.329	47.0912	104.853
	-50.0205	2.34427	-8.54439	20.6436	11.3258
	-56.0552	-6.93687	30.0462	14.6817	59.6157
	-31.903	6.00439	2.9468	2.6178	57.1554
	-2.10263	52.0991	8.02279	56.8809	466.504
	-37.1928	-43.1037	3.81382	36.7935	14.9912
	99.0919	-55.1652	34.4114	31.982	41.0215
	21.6655	-61.8422	55.9738	3.98976	90.6822
	201.798	33.4535	43.3203	-22.4701	164.775
	14.1595	-41.7596	75.0322	-22.7004	157.092
	17.3925	299.258	63.1553	-14.4097	249.842
	13.0449	-13.8055	41.9154	101.922	43.4112
	15.7829	-58.9358	99.7168	65.3183	23.6782
	54.1436	-41.6022	42.5624	87.8236	15.68
	-65.2514	-52.8498	-54.8556	86.0218	116.214
	89.0847	-60.0202	-33.2679	49.0203	43.9872
	106.065	-61.6671	-6.98509	55.5486	331.793
	55.5007	-52.6072	60.3955	-1.12728	-79.2054
	45.998	9.26362	17.5588	71.7608	-51.6857
	11.359	-67.0513	48.6942	-12.716	-40.4474
	22.271	-28.2498	33.5052	80.6467	-17.8358
	15.8069	-39.7268	69.4704	46.4562	5.52546
	53.5222	-60.2379	41.378	7.5946	-67.8701
	128.544	-63.2083	56.1709	-0.8184	488.028
	164.679	-56.6984	-22.6356	-10.88	50.9832
	232.663	-24.1271	80.5474	18.3812	-41.1122
	69.231	-8.94354	40.3078	92.2001	-76.5746
	66.9354	12.3715	30.9141	69.2904	110.966
	57.1518	-34.2554	69.8453	52.5511	32.6138
	-84.5154	-61.5586	37.8336	55.7797	-64.2269
	-76.3905	32.0929	51.3557	56.4378	-91.9278
	-57.7029	-63.521	59.1511	59.6023	-31.3896
	-84.3988	-56.8626	56.3416	79.3685	53.1817
	37.9863	-15.8925	73.5194	81.8856	-20.9854
	5.57661	33.1086	44.469	87.7626	54.4351
	114.325	-66.8919	39.0638	111.263	-6.94855
	-19.7695	83.3664	95.3449	90.8884	-89.4378
	106.892	-36.4969	12.1088	60.3718	0.171793
	18.8148	-43.2089	4.02054	77.8779	-13.4527
	-14.588	123.476	84.0666	108.886	-85.9159
	-43.8167	50.7458	41.385	459.317	278.862
	84.1559	-30.5442	66.937	473.774	292.713
	-17.072	50.5362	70.5698	85.9335	80.4786
	37.5442	104.724	65.02	18.1271	403.18
	42.7126	-50.6411	83.7982	62.075	526.851
	35.8383	-39.9483	3.80924	-19.7305	406.8
	53.0995	-9.30385	75.2245	-20.5079	-62.5507
	-58.8599	-57.777	41.185	-36.4615	10.8501
	-70.0935	-58.7811	-25.9674	62.1633	504.129
	339.567	-47.3246	17.9858	41.6061	15.9532
	136.246	-50.7191	21.0627	-10.7915	62.5687
	40.4243	-56.0872	-0.10423	67.1802	3.99647
	31.8595	37.4631	-28.4657	60.7527	-55.3879
	338.281	1.49933	-46.4712	56.402	104.167
	36.1829	142.814	13.6618	63.6219	-69.1053
	7.88729	-11.0942	35.6134	-39.3837	54.756
	34.6448	10.9662	21.7129	25.0823	-98.6813
	-32.1424	-21.478	32.6121	60.3437	-28.9039
	178.025	-44.9203	20.8799	75.4549	98.2507
	68.0208	19.921	7.17334	24.679	136.864
	-72.8917	-16.0842	-18.7042	13.0582	-34.2335
	166.157	33.6451	10.7153	70.9189	-40.9215
	-25.5827	-26.117	21.5008	61.6703	97.752
	-55.1254	-37.3993	45.1661	148.617	-52.9159
	-39.9563	-41.9575	1.81533	74.2036	179.11
	274.208	22.8787	-52.0903	-25.7838	-11.1926
	-32.9458	-3.75754	-44.8429	-2.09438	27.1648
	63.6909	-68.1447	-28.7307	6.94405	-1.94916
	-54.527	-30.3956	-4.60072	26.4065	-0.850171
	128.135	-46.7986	-1.41908	4.97052	236.484
	28.9286	64.5532	48.2822	9.42803	170.684
	-8.06367	-15.9604	-32.7531	2.578	31.488
	35.1938	-24.7943	4.35438	120.173	346.628
	20.6195	80.6009	-44.9571	58.5532	345.234
	20.2611	-54.737	-24.6495	100.937	306.063
	172.702	-54.3793	-5.56892	32.666	10.2541
	182.819	-34.2491	-29.628	45.9056	-12.3769
	122.558	5.76385	-30.6016	82.5972	-99.5715
	-39.2902	-22.5251	-13.5441	301.835	138.427
	127.07	-30.717	-53.2018	15.3275	199.076
	181.819	489.841	-55.17	54.8884	42.939
	127.813	-46.9898	50.2729	82.6937	97.3618
	40.2655	-46.1546	3.42538	9.28874	112.206
	137.957	-17.9977	-28.0564	-20.8277	95.5364
	-39.8476	-61.9402	45.7802	62.2681	22.1782
	-39.0632	-45.1582	41.3131	-26.2613	99.2399
	113.907	56.0471	625.306	9.94406	96.0258
	27.283	136.28	22.1262	-36.6804	126.368
	51.0968	-43.5856	103.879	16.7985	189.246
	169.808	-45.3534	34.7818	-11.0054	282.756
	160.48	315.509	-21.3836	-6.82481	267.366
	-64.3104	7.74313	33.076	-8.73955	58.7428
	113.784	168.853	-20.7845	67.1439	119.357
	328.974	161.424	-45.7085	66.2743	192.068
	18.759	58.4195	-53.7652	75.555	135.307
	93.9803	-9.36982	10.9284	70.2206	4.61826
	-46.5349	-38.6603	41.783	27.5602	18.663
	160.94	22.1277	36.3688	73.052	26.8644
	-27.3997	-18.7801	59.7621	35.9119	119.923
	165.933	43.7272	-34.1338	80.9172	194.13
	162.23	-9.07626	-34.0152	57.2337	218.837
	131.616	-11.0518	37.7885	124.514	55.5898
	136.456	-12.1398	85.5837	96.4048	-4.80569
	336.158	324.411	3.42806	-21.912	231.006
	349.494	-62.0823	39.3204	20.1135	61.4173
	156.092	126.886	50.8303	33.4859	65.8082
	312.763	-24.3081	88.5329	29.9567	189.042
	356.36	43.2358	32.009	10.61	86.8154
	389.26	-21.7276	35.089	29.7172	209.509
	394.179	-52.9163	-72.6388	65.8621	81.1287
	322.342	-50.8522	10.7918	90.4153	230.792
	40.2352	22.7448	-19.8235	68.2429	246.181
	19.1345	-64.5814	11.5175	-10.2524	41.179
	279.075	-8.82174	37.3547	-20.0243	14.8577
	175.693	-13.3855	-23.3254	-17.6232	304.437
	109.277	-59.371	19.8201	70.3243	327.913
	210.954	-63.7995	26.7934	-5.88307	215.896
	-62.4082	-9.61399	7.14395	16.4815	168.168
	287.786	-20.3678	-28.3031	2.52357	243.133
	303.029	-56.3974	30.0312	40.9198	108.268
	-2.63711	-33.1813	105.568	-5.37059	240.337
	347.935	-6.42797	1.35943	24.635	163.467
	75.3226	149.062	76.5552	-4.16356	52.3852
	68.5293	192.379	52.3628	-21.083	232.886
	102.704	196.18	107.222	-5.87404	51.4142
	-61.4464	-2.06873	0.057166	-27.7182	-23.6319
	-51.4091	-63.6626	23.1262	2.59004	31.2393
	-3.41907	-20.7969	136.693	-8.8831	-37.9478
	-72.3939	-46.2066	50.9282	1.69021	211.451
	-35.6662	-15.2351	5.66366	-23.8647	321.373
	-14.6725	-5.88446	-0.57459	79.6156	163.268
	-32.9074	7.53575	-43.3857	-20.3449	55.3973
	84.6331	-14.2112	-4.86508	13.3549	169.602
	-82.0333	-40.9773	33.8307	51.3253	279.256
	-23.8225	13.4779	-23.142	67.8335	258.642
	-97.8107	-37.5943	-63.1059	79.1996	275.996
	-93.0203	-11.4221	-2.02556	103.18	382.77
	293.581	-31.6615	-10.3984	87.1833	-36.4611
	-78.9053	-18.0012	-54.0584	82.9907	-20.2014
	-112.633	4.69789	-7.68636	40.729	96.4644
	-114.825	-16.4487	-8.30736	78.1903	179.646
	-57.3934	-47.6657	-9.04555	42.0513	98.3684
	-113.549	-42.9562	-0.88017	38.9977	162.189
	-55.6926	5.31875	-4.77641	-50.6371	98.9104
	-57.3284	-46.6519	24.0441	-21.8228	150.354
	-53.8444	-19.4756	-12.6897	-4.26352	67.4943
	-77.55	-47.1	8.65837	56.1095	122.299
	-39.6759	-26.5641	-13.8968	9.00343	42.7969
	-95.8849	-2.34556	-8.01324	46.3832	1.51912
	-63.3966	-23.0726	5.29533	-48.2157	49.039
	36.4727	35.2407	4.61847	-36.2346	40.5764
	-52.3922	-36.9653	6.30263	68.5187	53.8725
	-89.61	-6.58471	41.3904	64.7625	32.6658
	-84.0793	-61.3726	126.685	40.8518	64.0449
	-89.4102	-16.1593	9.01112	88.5189	21.472
	390.762	-48.3396	42.4352	55.3927	47.0818
	292.542	-30.6099	55.567	17.8504	-4.66155
	7.61619	-17.4663	44.1657	74.9731	168
	-115.102	-13.6333	4.1596	-31.1705	326.096
	44.6782	0.658424	-65.0353	-3.45707	88.4014
	43.3244	14.4842	-26.0969	-15.8881	109.206
	-73.1443	-17.6903	-7.21647	-27.6636	275.9
	420.846	-46.4932	127.733	-28.5987	107.158
	-82.3229	-6.58942	65.8297	23.8851	-62.4153
	-42.8473	-20.0433	117.779	46.8185	42.5536
	275.88	224.868	68.7729	52.5366	-57.9436
	-36.1562	-50.7661	630.71	-0.85032	128.405
	-46.7845	-5.83893	41.9657	-2.55786	118.079
	274.151	20.5453	30.6101	-4.39577	229.712
	-52.9128	-33.0794	22.0969	9.21344	59.5511
	154.605	107.327	50.049	29.9108	132.938
	238.927	35.3087	61.9113	33.3873	-23.7883
	18.8735	-18.2099	25.3626	38.2555	6.57856
	172.461	4.76833	-61.0793	47.9571	62.0363
	228.691	20.9487	-46.4114	46.775	37.2969
	-19.0402	-58.0159	-70.1763	122.145	134.53
	368.775	-9.07051	3.63504	95.0649	301.957
	444.497	-6.17248	44.9676	88.145	73.6894
	-21.5592	-12.6244	6.53748	106.973	114.393
	-18.5769	10.4643	-30.8148	39.7325	4.44325
	462.312	-38.1663	-51.9786	114.173	-24.3172
	417.122	10.0592	252.821	93.2217	286.9
	-33.2294	19.612	31.2716	101.517	276.233
	-67.2225	14.5364	22.1799	44.0824	-11.8525
	471.446	54.715	-12.3009	-26.9177	1.19839
	-68.9549	52.5552	41.7951	-33.0587	-26.2753
	402.113	92.6046	184.029	17.5891	166.31
	417.321	2.22787	25.2353	-45.1729	89.8845
	-3.79109	-37.9614	91.6956	26.6738	41.1561
	-37.9423	-7.8024	35.9286	-28.2514	81.286
	-56.2785	-34.8561	57.7012	-46.8361	67.2616
	451.057	174.078	17.6104	-26.156	-39.4156
	-8.73289	-26.1938	-68.9193	-43.4248	-48.265
	366.476	128.266	58.0138	-32.9868	26.6323
	451.64	64.4366	62.4393	-25.5414	106.852
	-17.1317	-5.73882	39.0254	33.7649	16.6503
	-66.1103	4.1258	63.1011	63.4456	219.659
	-95.0717	11.058	37.3492	45.9344	199.549
	-21.8754	-47.9549	13.8401	99.5353	179.521
	-68.0641	14.2776	-8.0296	49.0778	329.58
	-21.216	-45.7504	14.5344	117.37	258.916
	88.3598	-63.2397	-27.8917	115.441	183.188
	-55.6758	2.4535	476.819	28.8613	291.149
	-6.67592	-28.1974	443.117	95.0137	-49.0137
	-37.702	52.2892	39.9627	65.2799	-12.6743
	51.3588	-39.8485	26.6026	75.1911	87.7599
	-70.076	-9.97882	10.682	64.3421	142.513
	-49.4459	-3.92226	89.8022	15.6812	67.7221
	-32.9596	-4.12953	91.0888	11.2585	223.888
	-111.114	17.7487	13.8103	41.13	118.611
	374.618	-50.2207	70.1781	-24.406	-5.96045
	-23.6616	-9.6763	77.9756	77.7403	133.389
	52.3257	-37.2847	24.6345	17.533	13.3497
	343.22	-8.48367	-51.4067	31.316	163.473
	410.811	-5.62682	-12.0562	-3.37386	17.9054
	96.2256	61.553	19.464	79.967	606.663
	-22.8853	-3.7694	21.502	-20.3386	134.292
	442.644	-8.46501	140.669	-31.5584	0.689959
	-63.6995	-22.2209	-7.27257	37.5689	-55.9236
	-87.0545	-7.04509	-6.17746	-16.4387	-10.1763
	-96.9216	-0.3867	-56.9589	-28.4794	-26.5547
	-76.8238	-27.9093	-3.03663	11.3062	28.6067
	21.298	76.8901	15.7971	80.3711	2.12029
	390.394	-24.6444	-2.15389	-51.724	-52.7546
	274.64	-5.74548	689.977	-10.3965	-59.0959
	-50.5415	7.76113	293.404	65.9826	-75.8315
	-43.0257	166.367	25.2425	2.84499	-22.3069
	364.315	39.826	0.520856	75.9788	117.277
	-117.585	268.958	54.8645	-33.6711	239.663
	326.357	310.167	-12.1864	-20.1364	46.8674
	253.356	12.563	44.704	37.3522	62.4504
	417.221	-44.3896	-12.2673	69.5739	-86.8969
	178.378	-32.0326	-17.6957	64.4534	-54.1269
	-12.6576	-19.8215	0.265975	34.4908	28.1237
	299.814	-28.1192	38.4183	86.8462	-36.7622
	60.1187	-47.2228	40.6538	27.7929	28.8446
	-11.2406	-41.7031	24.1761	78.3162	186.705
	292.524	1.95321	70.9792	67.333	12.8844
	-70.855	3.28708	-39.7002	15.4905	-40.9213
	348.934	-11.3417	14.1387	-32.513	-4.22465
	263.955	-1.54853	45.1471	-46.509	-58.5418
	385.769	-28.5062	41.8465	-16.6417	29.3333
	-9.62038	7.35093	37.0379	15.7121	14.8437
	14.5254	381.528	3.88836	-18.2536	-96.2821
	81.0593	5.80832	23.1163	-8.35037	-58.2073
	-20.0541	-1.18662	15.8879	-18.6711	-44.262
	90.1841	-2.91323	49.612	15.1376	-77.5746
	-25.8376	-20.3476	-15.2903	14.2552	-42.6752
	112.701	5.35111	77.7271	49.8095	-52.3371
	99.7454	10.9226	67.463	28.0303	-18.7015
	66.5135	-0.91669	-4.74693	88.26	-75.2994
	-14.1693	-26.5057	-11.0506	61.2575	-52.7706
	-4.45287	-47.4514	223.816	10.9645	-24.9933
	-64.0971	-54.2962	86.4975	-32.9796	52.3342
	-26.4204	-51.8116	64.7741	-2.49675	29.7123
	17.4607	-53.3474	57.3882	-12.4498	-11.3519
	-59.2742	5.80475	59.9159	60.9874	-25.0049
	-8.82704	-49.0571	66.7645	11.8758	-24.7122
	240.583	21.5801	73.2045	72.9205	-12.1121
	148.164	311.969	46.8148	36.9545	83.8352
	-41.5917	222.137	101.094	70.9806	-43.2965
	163.239	40.6737	384.544	17.4426	-10.3663
	309.417	-2.74463	100.137	-20.7168	136.366
	429.327	113.277	82.0621	-31.2537	145.945
	-73.3278	142.596	-5.92265	4.19281	55.502
	306.312	208.256	-27.9779	-16.032	96.474
	413.612	-26.6484	-20.6665	-36.0275	-16.3086
	-29.3006	-46.6118	-54.5651	31.635	-66.3424
	-90.6554	-36.225	58.2904	-46.2448	24.8129
	-66.6991	57.9514	8.82659	-29.2417	0.996079
	-76.0938	37.0645	21.2197	-19.2244	39.5076
	367.598	-8.60227	14.4453	-39.1759	-11.5577
	4.71695	-53.4079	-9.0316	-26.7944	8.62896
	-51.8049	53.9917	-22.5999	61.093	-100.194
	-67.1395	-6.15149	496.274	-23.6522	59.0694
	303.585	-13.1147	67.5594	20.6507	-5.62014
	48.1978	-21.6686	-3.56677	-5.14724	85.1197
	-61.7251	27.2879	32.1856	-15.8544	0.246964
	-81.4633	226.052	-0.55881	-20.3474	-55.6964
	-71.3522	155.438	9.1812	72.9168	-37.3036
	-14.2961	-5.56758	340.24	23.2724	572.416
	-80.0212	32.6247	383.585	21.572	-57.1931
	-18.3194	18.2854	26.4161	-18.1965	-70.328
	-91.5235	-59.89	64.6678	58.6823	38.3223
	-62.5709	-66.8734	76.335	87.1006	32.6965
	-95.1158	115.667	88.3542	17.5039	-8.73003
	-43.8742	-27.9573	-4.26954	41.0324	52.8171
	-81.7787	-4.89377	481.212	50.8915	-28.3324
	-80.6812	-2.32237	-18.3198	34.3548	11.526
	-85.6098	-3.93371	85.7058	0.485091	-21.8414
	-25.8544	-14.1556	47.0968	-7.56395	-59.278
	-48.3179	75.2703	10.2604	19.0753	-49.665
	-74.151	73.5847	293.992	4.15501	-54.8058
	458.371	-15.1276	90.1229	-43.6373	38.3008
	452.311	-20.968	116.892	-7.77155	-33.2162
	110.371	-15.4645	-21.3251	7.98284	-84.6703
	-51.5297	23.4312	80.7372	-19.5587	-82.6753
	-30.722	151.315	-6.96639	-11.6518	-21.5383
	518.128	-8.71512	87.2236	-23.3879	-35.4616
	-100.868	155.333	-7.47679	45.395	-50.8702
	-98.4612	39.7632	362.499	-11.7589	-66.8922
	-65.2054	28.495	500.245	13.8161	1.34682
	73.4954	-42.7134	93.1686	37.3671	-29.1624
	-44.0719	34.8572	-9.13391	8.62297	17.1219
	247.008	-13.4254	-1.38616	22.6365	-77.0452
	261.981	22.2949	7.77016	-2.93649	29.3241
	187.031	4.19891	284.761	44.2448	-45.3298
	-41.4799	-49.7592	303.608	-16.3614	-52.5223
	-112.195	-16.9251	302.547	-20.5113	-88.0659
	-120.852	-65.7586	-15.9606	28.4692	-31.9842
	-79.5811	165.625	93.756	-5.00643	165.973
	-55.562	-28.1653	431.149	18.9843	226.352
	52.2869	108.17	6.76262	6.78238	94.7001
	-43.4982	187.431	22.8098	0.726747	59.3177
	-44.25	22.4059	21.5606	32.7465	-65.6995
	-88.9202	12.7965	33.0185	69.3044	-60.9958
	-67.48	-31.6215	30.6255	12.2763	6.49982
	415.321	-26.5342	20.3228	-10.169	20.5837
	-73.8352	-46.6151	26.225	-12.9989	25.2751
	-8.15901	-0.95816	315.136	-39.895	-15.8251
	-70.8876	6.28922	17.3831	7.426	-0.412413
	-121.273	158.562	16.2403	31.2274	-46.9215
	-75.4969	103.832	43.2398	-45.0568	-30.1773
	-94.5289	-15.4879	45.8068	28.7884	-102.907
	-108.546	93.0377	26.8337	-42.8577	132.641
	311.613	338.378	38.4813	31.7957	-67.276
	-35.0761	267.56	20.529	38.4655	-20.3717
	21.3685	209.67	26.5887	0.010638	14.6888
	-1.84272	177.169	0.617308	33.8728	-49.8976
	15.7471	9.91296	37.3199	72.3316	24.1964
	-78.5758	139.941	26.9702	17.4611	33.7414
	42.4238	-36.8375	60.1539	-21.405	28.2327
	-27.4199	-11.4069	358.139	-26.863	-54.2191
	-69.9147	-27.8728	15.8312	24.6005	-19.8039
	334.016	-23.3592	33.8761	72.9037	-14.7196
	-74.3689	23.7496	38.4121	79.3369	-60.7366
	261.222	-35.1963	19.3697	20.5313	-11.2041
	170.623	-12.1592	28.7943	85.5093	49.8644
	294.216	16.7258	24.4401	75.2162	591.477
	314.899	25.0242	54.3626	40.478	26.3276
	41.7108	-8.34778	27.7314	94.2246	29.2127
	-76.7252	-11.4575	37.3428	34.8922	9.61382
	-55.19	144.718	26.7813	22.17	274.166
	-85.8397	206.224	3.92446	27.5877	96.5108
	-71.8278	37.3992	25.0443	-3.39866	224.395
	55.3468	-6.19386	13.0705	-15.8965	-81.6182
	-16.2418	-21.1075	44.5815	70.0708	-41.6502
	-78.2919	-16.0082	2.33199	-9.85413	-55.5238
	-64.9145	-28.6063	46.4755	77.7903	11.0131
	-106.177	20.9094	11.0402	-21.3515	-43.7379
	-31.2721	119.478	25.2807	-31.196	14.9353
	-94.3898	270.727	-2.58104	37.4703	4.36432
	446.86	-2.08602	29.6212	-5.9406	-81.077
	-68.8194	-29.3593	26.6037	-13.7829	64.235
	-87.1732	-36.3321	21.9831	-10.9865	-88.3508
	212.549	214.183	30.1835	726.177	-44.8442
	15.0787	38.8884	35.4651	-20.2566	-68.9015
	-95.943	56.0675	-6.42211	744.38	-16.9703
	31.4393	-44.945	58.7422	-21.8884	-63.3443
	-76.3342	3.15271	63.0884	-20.6059	9.60513
	-22.0081	297.44	82.1811	-12.062	-32.3986
	343.192	-65.0597	34.4057	0.170163	511.911
	159.01	27.8546	31.6987	15.1289	-14.5824
	-20.2801	26.5378	31.8792	66.4931	567.012
	37.2835	-31.5422	36.0164	-25.9146	546.897
	-108.985	61.24	26.9041	26.6371	497.941
	-63.0791	170.725	62.126	-3.68782	166.333
	-121.592	231.082	83.174	-24.5942	542.306
	-73.204	-34.0293	-16.8751	16.7087	492.186
	373.963	-34.9077	13.4114	-30.0455	-23.4851
	352.861	0.7982	-15.0983	-18.9219	-6.97918
	-113.384	-26.5874	47.6709	24.9471	8.95382
	-36.3295	48.624	9.82798	37.5434	72.0708
	-52.7267	176.84	20.1957	34.5644	176.945
	-40.7894	68.023	320.114	30.8959	69.8075
	-42.7932	136.587	80.324	91.0398	-7.76543
	-0.88395	239.867	95.1478	33.0257	12.4605
	-86.2984	36.6901	-4.1197	59.7922	-52.0338
	-57.7931	-16.5264	83.7884	41.7427	503.443
	-55.5185	63.8247	54.4275	32.5416	17.258
	3.0648	53.6168	236.286	31.2147	-66.9631
	-48.3245	120.519	-34.5469	11.954	-73.141
	47.8977	212.812	13.4977	64.2441	-34.0074
	-87.0113	216.692	75.5241	16.0664	-81.8118
	-76.6058	9.71515	-8.23262	41.0157	-69.1445
	-39.5243	19.2408	4.54886	-16.7705	-4.98116
	-114.571	75.0131	89.1602	56.7928	-95.2328
	457.279	70.579	513.875	-21.6074	54.1813
	-128.925	216.732	28.9742	-25.543	3.50115
	-17.8042	206.72	368.438	-6.26454	16.6804
	-103.677	141.412	439.678	-4.85055	-1.16686
	-117.075	-53.0981	442.56	-48.8606	-41.9022
	497.003	-54.3567	339.339	-11.3163	173.473
	-41.3187	302.964	29.5165	14.2108	13.7641
	-63.6537	132.419	2.64705	7.02036	-56.5313
	0.543611	42.9763	28.6268	-8.46747	-48.0976
	-73.6564	10.085	3.99038	26.4259	136.329
	-24.9134	196.335	2.47471	-23.1674	-1.52472
	440.831	137.138	-2.696	-49.2418	159.962
	-116.158	-20.5558	21.8135	34.1889	12.8987
	465.235	-62.4306	-5.57078	-26.9802	-12.2799
	-86.6297	-54.4912	-6.28108	-22.2319	4.6609
	461.941	11.7071	97.9621	14.8994	-37.5505
	-97.8434	35.3952	14.6631	-18.2731	181.131
	-109.701	-48.3688	5.20046	44.8284	156.599
	208.317	237.081	30.9841	-2.91952	11.456
	275.964	96.747	-30.082	-6.2412	-53.4335
	461.271	227.205	113.363	-39.6071	257.669
	-66.0876	-36.8594	13.9775	0.889695	80.64
	384.621	132.943	114.725	96.6784	227.138
	453.399	-64.2801	103.483	103.453	21.3795
	-59.0825	58.8967	-51.0333	-12.4399	74.0723
	-87.0109	116.735	3.51113	-5.59721	103.584
	475.365	65.5615	87.9458	105.052	181.993
	-49.807	147.107	52.8314	36.6112	102.745
	-110.901	-10.3553	64.987	30.1045	126.049
	-47.1522	-22.4777	-19.9248	16.7965	-87.9405
	449.65	62.8599	-51.8926	-22.6975	-32.1515
	-1.59146	-13.4766	-16.2198	12.1003	-94.3052
	355.245	23.5364	123.999	92.3447	38.1115
	-63.8083	-43.8493	341.232	108.811	29.7485
	453.622	34.7078	-13.5579	100.76	233.597
	364.146	192.54	83.9495	98.7335	18.1473
	451.439	-62.9534	101.121	130.658	-87.6622
	364.478	-16.6778	-32.1565	125.645	-18.2259
	-52.0712	187.804	2.78008	78.7031	51.2167
	324.688	143.38	-7.41137	14.051	124.128
	-45.7573	114.645	4.12179	-46.2731	71.2039
	408.042	-24.3096	12.5847	-23.979	174.736
	476.872	80.7704	78.3248	-6.06391	59.8525
	428.714	-11.3456	94.967	-33.3641	93.2887
	358.928	19.2326	112.955	39.937	85.1874
	-54.0337	-34.2431	489.816	2.9109	155.97
	-35.6548	65.6989	83.3382	-37.3388	54.7402
	-42.0991	201.931	17.7787	-23.1756	102.045
	2.34693	58.6206	-18.5993	-15.1843	43.8894
	467.64	109.141	8.85146	61.6098	124.357
	-83.8319	-60.1924	15.5782	0.006102	-6.40779
	42.2486	188.717	120.827	28.507	74.0447
	182.122	14.0804	-4.91783	46.2971	104.042
	312.137	39.9217	338.767	39.2338	34.5153
	-28.1214	399.473	337.513	36.2583	-4.72131
	411.01	169.101	25.4612	26.7753	21.2599
	290.559	35.9591	27.0372	82.5624	121.337
	371.897	54.8148	222.71	54.8563	82.828
	440.03	26.7374	230.244	114.132	-26.3254
	28.9746	108.563	-7.4843	75.6966	1.26287
	44.0157	111.283	362.323	24.449	94.6823
	458.507	69.38	171.441	64.3345	216.265
	287.678	-15.5427	105.242	42.2899	76.2002
	435.038	38.1613	130.831	84.0936	-46.9598
	-56.2439	19.0642	10.5017	41.5857	230.435
	298.502	24.5699	21.934	53.9711	-1.72107
	393.982	-19.174	6.84716	58.4652	-26.8291
	-16.2274	93.1186	108.109	65.5915	-42.9806
	-37.253	187.625	67.3389	33.6848	-66.591
	444.581	254.31	173.602	58.2889	-3.22941
	348.114	191.227	14.7813	-24.8096	56.477
	413.886	155.279	65.0843	15.2431	-3.68901
	-0.41316	228.69	12.1415	70.7733	-62.1338
	452.061	-29.6278	-4.64844	-4.17682	-48.5298
	320.346	98.5915	-3.28982	91.5759	-89.6051
	413.483	85.3243	94.7794	59.0053	67.3475
	262.025	8.39602	-16.8082	-14.2416	-48.134
	372.068	1.49673	-4.19155	18.5754	28.5651
	11.8217	72.0548	77.5044	41.1472	224.503
	362.577	85.0441	-3.81352	13.0426	-32.6275
	-10.3651	65.5363	523.268	65.3659	-87.4899
	487.108	-33.9358	181.56	67.8457	19.8233
	-37.9213	-12.2441	105.364	95.7354	-94.0223
	52.0649	174.734	64.1711	112.688	503.205
	390.899	234.07	-47.0365	105.996	-36.7025
	465.562	240.167	91.16	101.713	-27.5535
	45.6506	145.656	83.1636	58.1317	-60.1533
	293.148	173.649	164.607	92.1033	-3.20354
	371.522	92.3548	394.262	82.668	53.3573
	505.774	112.548	194.472	-21.8119	543.443
	34.1188	67.7208	84.9503	-24.8201	-18.3911
	417.58	148.056	-12.6268	-30.6518	-87.1054
	372.673	71.0943	-22.6011	66.1053	-85.3936
	270.092	110.882	-23.5177	-6.81963	-42.1353
	388.021	-11.7606	7.00325	89.3163	-66.8244
	81.8737	66.2936	10.3545	112.543	-87.1647
	306.666	22.2459	338.118	109.816	-34.3273
	330.841	85.6282	336.38	92.1265	-59.0078
	316.743	26.4274	7.61279	96.0042	462.102
	28.016	111.532	-0.35097	2.93764	121.183
	474.209	19.9843	9.70636	-28.6778	15.6712
	158.167	19.0277	91.3498	29.9332	3.79841
	369.995	217.99	2.96069	6.10819	-8.16495
	485.584	7.4816	-21.2354	-9.31912	-18.9993
	425.701	119.793	4.10385	60.9402	17.3936
	16.6156	262.546	-7.8121	28.9035	40.1514
	403.06	221.715	-17.8533	106.323	13.1368
	337.884	272.402	-4.71753	50.8869	561.471
	446.241	92.6842	376.021	65.3704	-40.0974
	385.233	245.917	18.2707	71.4546	553
	37.492	12.0239	-11.751	101.101	33.582
	392.632	-26.9752	173.85	68.4865	-94.6138
	-2.33985	-5.70371	201.624	44.5936	552.016
	2.20501	42.742	96.6951	-7.04521	57.7265
	24.9065	-2.58903	506.191	77.9785	529.441
	39.3426	6.2144	8.94839	43.4647	214.843
	489.39	14.8887	100.474	56.513	189.604
	5.55947	25.4962	-21.4584	89.3294	296.823
	306.941	74.0555	36.8299	126.118	244.239
	1.51529	-45.766	-10.4817	48.1407	-18.4613
	-62.0793	-32.9528	73.193	49.9567	-23.7713
	255.353	3.08505	103.551	75.0774	-21.7186
	22.599	92.4991	100.95	-8.9975	-28.9092
	344.771	18.4775	-11.9916	75.1317	-43.7956
	27.7043	-17.4482	-46.1914	67.676	32.534
	-14.8926	-36.4855	3.33043	11.3705	-55.9106
	18.3523	-15.5001	0.992829	73.9445	-25.2997
	352.666	239.661	124.417	94.3821	74.4698
	49.4839	-6.29859	60.9637	60.9074	294.836
	340.734	-43.3352	96.5864	101.317	19.0223
	267.838	-23.5747	174.445	86.6228	75.2915
	62.5685	-1.64256	11.2747	89.108	14.5926
	-14.7648	4.3891	8.82973	56.697	-14.8723
	-42.6569	-28.0882	36.9096	112.661	70.0596
	27.6492	-8.54878	20.4468	15.1684	295.261
	354.238	208.236	-13.8152	-40.4864	99.5049
	73.6669	26.1408	-11.7048	-27.8842	120.944
	254.608	-39.2996	21.9819	17.5568	180.694
	-35.7435	-21.1042	9.5893	19.3406	26.5039
	42.8653	175.4	87.3585	56.7976	24.9451
	25.1241	10.1848	-31.9464	12.4379	-56.6964
	33.0479	45.0373	-2.25438	25.7574	-29.314
	51.0575	299.789	50.6322	57.5491	-84.8512
	30.3397	-63.1137	1.67944	73.4656	118.066
	54.6698	179.654	146.257	92.8526	-73.9454
	-81.3219	59.9754	110.25	130.425	-67.9218
	-106.416	-25.2095	26.9853	81.7293	-53.7587
	-90.5149	222.199	9.87095	78.3308	24.3286
	-103.641	97.8499	-7.15787	85.2422	-10.4718
	-106.538	-37.8331	7.56076	42.8688	252.046
	-91.663	-24.9639	141.377	60.5211	253.75
	-91.68	24.5136	139.894	67.9189	196.448
	-113.556	-33.0437	6.37773	75.3041	81.5778
	-112.024	47.7061	151.749	64.701	221.063
	-105.586	-1.44008	141.1	10.1233	59.2078
	12.2074	-34.4682	304.968	-40.3084	130.47
	48.7065	-25.8885	38.852	2.0717	98.2266
	484.119	-35.8086	-6.79887	21.3806	25.3296
	401.691	19.3506	26.5412	16.2795	10.1693
	28.3734	5.94291	3.68707	4.77843	-24.4416
	-4.47104	-26.8511	24.1475	40.9622	92.284
	38.8655	-37.9699	0.565884	123.814	117.292
	35.9429	106.633	-10.1691	68.5104	56.9131
	48.5719	-21.2923	131.153	97.3388	71.3041
	204.68	7.14369	135.249	142.518	43.5332
	36.5112	-44.6498	173.421	83.1514	-37.4875
	-12.0779	-55.0204	149.042	104.094	-59.5164
	31.497	4.95109	127.958	66.7656	-103.397
	75.9534	-50.7078	26.7848	146.471	-86.8595
	49.2126	47.4094	21.5071	184.594	172.549
	52.4935	-32.2517	193.845	294.82	90.4652
	-11.9531	-12.6181	150.564	70.4652	-84.3809
	55.9576	-67.072	109.479	1.85448	-6.06821
	63.68	49.1003	187.256	31.8859	93.1026
	414.032	119.004	26.3966	9.90192	10.8836
	16.4913	162.958	25.695	101.166	35.0262
	4.02444	258.641	-2.53668	137.453	12.9215
	70.2396	114.274	-50.5886	276.847	24.9128
	20.0845	-40.3806	13.1123	236.612	46.4394
	44.659	148.006	100.115	77.5079	-41.753
	71.6365	143.475	4.9916	-13.9708	-0.987179
	11.7587	77.2919	8.47232	19.9973	-0.428888
	41.1603	139.134	-1.56557	63.8514	87.4933
	135.729	12.3851	152.233	10.2711	138.253
	84.9656	9.49392	41.1642	81.245	18.8981
	-9.67557	10.0287	14.9744	16.2416	26.264
	120.857	-11.9387	20.0684	41.331	196.844
	33.178	-9.88811	124.837	-2.81865	102.739
	15.8984	-23.34	22.4654	9.62472	117.83
	141.841	43.3087	27.3941	-3.02952	143.343
	23.1351	43.0395	119.448	34.8861	102.98
	34.3569	74.2789	27.5367	-16.2457	40.6266
	17.4867	138.227	23.7928	108.904	275.771
	5.24846	169.461	82.0132	291.24	509.019
	3.84357	190.942	115.448	327.348	486.192
	32.1197	97.2225	22.3803	380.13	65.2147
	-34.5981	189.131	3.00266	422.466	-22.1095
	-21.6367	57.637	34.212	405.233	97.3991
	272.473	256.699	24.6266	-2.00174	-77.7744
	-43.3562	42.3019	66.7921	522.331	284.199
	5.58943	220.094	128.116	224.923	74.3354
	21.4405	157.827	52.2619	202.684	144.058
	248.109	-37.2574	134.505	293.397	83.7534
	456.672	88.2939	133.942	367.938	-18.2277
	44.5295	-44.2216	139.257	223.501	-30.9025
	-21.1372	59.1304	129.885	202.313	-37.246
	323.171	6.93502	35.6033	152.638	575.592
	109.993	-6.37327	132.969	209.94	285.701
	390.664	330.399	123.292	487.154	538.984
	139.519	-32.8833	100.205	18.2263	-101.94
	-65.3615	-23.6573	140.107	442.153	26.5117
	-64.0077	-32.3231	91.3358	384.177	-68.2239
	-0.91206	-6.68853	142.685	387.254	9.69283
	-41.076	18.6739	18.9277	272.887	-97.4682
	-22.9165	3.18827	136.698	254.639	179.399
	-7.70015	101.527	147.191	245.428	125.02
	7.1032	-31.1947	30.3466	280.973	61.0023
	-14.5475	-28.0026	124.265	317.56	244.216
	-21.7987	3.63393	67.1429	330.987	152.433
	-72.3668	107.126	160.963	307.969	39.0698
	-11.5556	-24.6777	300.144	239.817	-82.5354
	-49.9337	-9.94516	115.038	179.91	-29.2044
	219.089	124.769	20.3495	253.642	-14.6925
	302.017	215.918	45.6402	331.666	-26.4853
	189.816	141.521	20.7396	363.491	230.808
	24.5579	-43.5172	102.116	254.306	0.243833
	286.365	99.5583	120.493	188.33	-70.5701
	-89.8874	73.5945	140.679	205.167	-1.80873
	-6.40442	-57.2656	175.904	257.065	-86.8432
	47.6188	-35.6797	127.519	230.296	-61.1551
	14.4314	-52.9298	25.6846	230.425	69.0078
	25.4611	13.8093	16.8536	173.462	-62.2468
	-26.3515	26.0597	8.83939	253.117	-100.292
	9.62086	30.2266	126.515	221.303	-75.2633
	-59.8912	-24.6108	91.7465	273.744	24.2324
	23.5587	-28.0499	62.8221	277.538	67.5226
	300.602	41.1037	26.5626	193.29	68.3147
	18.1502	187.546	14.8569	199.407	84.6885
	-15.4574	42.276	121.665	279.339	172.253
	26.427	87.4949	112.09	350.983	114.67
	-32.6606	32.1848	151.684	310.381	97.7517
	164.69	87.1651	146.616	167.769	160.138
	79.8534	149.732	134.27	214.518	-71.7629
	121.067	177.121	155.554	265.654	55.1929
	-71.6661	39.9784	151.536	259.586	80.6024
	-46.5055	-18.4697	35.694	275.24	162.367
	391.045	81.2021	135.453	256.162	77.8544
	-30.5083	9.94813	118.727	172.195	176.885
	7.76055	508.311	77.1987	249.509	31.1307
	18.0522	78.2763	135.103	493.512	-83.1183
	8.75096	108.012	140.641	270.26	486.202
	-19.9244	-33.8775	32.196	266.123	-5.94254
	374.612	226.159	139.623	275.197	-86.5246
	216.911	124.767	35.6826	253.172	-68.9931
	454.59	-7.83568	140.547	117.257	-6.63591
	26.5602	-18.2222	134.444	196.464	-96.9876
	121.179	-36.331	26.7899	299.607	5.143
	-23.5948	196.254	46.4466	338.112	-44.203
	-14.6424	-12.2012	136.142	304.021	4.54316
	107.999	12.1916	132.403	272.959	41.0953
	-60.1395	104.055	32.3149	294.839	50.1367
	-119.21	275.591	135.05	173.121	151.403
	-113.8	106.109	18.2893	177.705	-62.3361
	-48.0835	107.362	40.3378	175.025	58.1995
	-85.2277	-5.65753	43.2161	201.793	-6.32144
	-100.673	-34.1275	17.861	176.138	225.723
	-88.8763	18.1963	37.099	169.229	-4.29218
	-91.2952	-2.44126	164.295	202.309	-62.1314
	2.93278	13.0618	142.539	146.453	-76.9755
	-55.7141	-30.2154	150.33	250.871	-12.6589
	37.1854	-15.1143	131.598	168.633	-90.9653
	-33.3329	-6.11258	119.122	112.082	-32.637
	-58.3848	-37.1656	135.398	-12.5466	-99.6738
	93.4302	-46.1907	59.7705	170.326	-2.74479
	165.555	-9.90026	145.08	112.798	16.6433
	84.302	-16.9547	151.15	131.831	83.1454
	-21.7401	-47.0287	142.431	256.257	-9.88893
	-65.3651	-2.9062	72.1227	347.256	-66.4677
	-5.7548	180.891	132.34	189.496	-6.63944
	-112.227	40.4415	154.06	153.523	-2.9179
	22.4922	146.452	35.2321	80.5613	7.77644
	-93.1238	66.4259	31.8395	116.939	176.15
	-19.8906	121.879	45.2178	174.267	130.367
	60.0656	132.452	133.113	141.023	254.404
	127.949	0.926833	245.648	149.058	174.2
	147.131	-31.7465	328.116	35.9021	100.447
	-84.3343	-32.0437	148.147	8.52023	-52.5974
	-122.198	8.95926	37.6184	144.518	275.061
	-102.402	31.3176	42.2213	46.6365	126.689
	-20.2254	35.0897	9.48458	28.2065	-61.8688
	-28.3868	-30.5525	15.4184	127.144	26.4625
	16.8368	-7.13195	33.776	131.576	537.469
	-7.11062	-0.0071	15.1465	335.381	89.5377
	-43.52	117.672	174.885	3.50534	129.315
	14.9957	146.113	286.777	-28.129	107.171
	8.47919	13.7382	43.9749	-5.0404	15.9
	33.3495	-24.9863	115.522	20.2121	275.484
	282.861	-45.0329	148.961	-1.09348	275.813
	224.662	20.6629	158.426	13.6563	256.447
	-93.9696	414.312	105.62	13.0748	-9.52766
	-16.4147	-1.47524	149.911	-25.3943	-100.907
	-51.6877	37.8835	153.678	7.79155	-14.246
	22.1278	213.621	132.018	-4.59308	-15.6741
	-38.8695	-2.63362	172.664	30.2167	20.8815
	-76.5409	6.47919	146.209	87.4232	246.051
	-67.9755	236.381	29.2547	98.254	246.326
	31.1049	170.138	79.721	101.983	8.02729
	141.744	-23.5407	49.1616	112.127	10.9548
	312.839	16.8234	176.989	95.7854	26.8433
	203.808	44.825	145.235	35.8717	-23.8453
	23.1156	16.6599	35.278	43.1606	222
	22.2378	-18.2324	134.461	140.371	75.3414
	-60.2999	83.67	146.953	208.244	14.3149
	-104.572	19.9258	118.415	139.309	-43.3494
	-78.0178	-36.9482	162.04	264.55	-28.3056
	99.6382	-61.9978	147.334	112.014	22.7214
	-84.3548	-12.089	90.5281	312.953	89.813
	94.959	193.991	94.7848	16.7579	113.257
	311.135	21.3273	130.377	97.4769	213.029
	-36.8223	-4.58107	124.631	125.264	112.878
	16.1158	141.574	109.131	277.055	149.22
	9.69478	257.396	110.267	303.707	162.447
	41.8485	-62.4003	127.014	111.264	133.833
	17.7811	165.645	134.98	48.6362	64.6346
	328.99	142.726	144.775	-27.4789	-56.5507
	-89.1023	2.06136	155.337	44.8954	-12.7442
	72.2088	-32.8211	150.611	36.2896	-97.9699
	-23.3322	-13.4933	169.009	51.3181	-11.0715
	22.885	-25.7434	146.338	149.664	2.57001
	189.639	64.5567	158.456	276.528	1.62206
	119.225	170.981	144.907	73.1978	-22.6057
	29.0812	169.125	162.096	88.746	-14.1436
	96.9873	115.676	280.956	47.8437	-85.9019
	379.974	216.526	139.683	49.1734	210.986
	26.6019	194.778	128.36	88.2503	2.85505
	-22.6908	18.3994	31.4662	329.018	117.545
	75.9134	236.027	11.4931	249.186	192.025
	-127.723	252.188	76.9922	147.899	96.7384
	353.785	172.595	69.1719	59.4797	-36.8169
	116.433	52.0245	-4.02047	81.686	-55.593
	107.352	244.911	179.476	11.983	-7.13679
	-12.13	-54.7819	163.163	90.7844	-62.8069
	116.235	364.349	47.7212	97.4252	-66.009
	354.227	251.395	161.297	46.2373	549.63
	51.7948	190.317	137.169	-19.1422	-9.12548
	90.3531	63.4543	166.538	70.4152	54.8819
	259.514	-15.4068	157.859	22.7359	-13.7815
	194.576	277.846	24.9357	27.1987	-75.6636
	384.572	64.2335	60.2617	93.0605	165.266
	379.008	256.002	140.427	33.1364	102.147
	389.851	153.25	15.2986	42.3362	191.704
	295.201	209.625	30.815	83.1373	-4.86483
	294.816	-1.07963	113.346	78.3543	204.168
	176.403	14.2552	144.507	14.2377	205.034
	254.536	-41.4331	211.554	6.50256	-62.0493
	160.935	-9.97251	130.614	80.4682	54.9385
	335.335	-20.8422	138.502	267.107	8.72391
	180.557	273.414	44.9584	289.973	-37.8808
	-80.6962	6.74763	158.557	303.062	-75.6529
	-24.6234	256.545	-14.8063	26.9054	-35.8423
	-46.7205	75.5443	-19.1915	27.2777	-76.7949
	13.2582	242.298	194.251	281.405	-39.7757
	240.049	423.826	174.175	237.682	-14.2419
	191.683	453.432	129.584	48.1228	-11.1539
	51.5709	263.091	174.49	63.2474	120.623
	72.8575	218.645	83.8567	175.991	188.831
	68.8183	201.5	28.0423	120.211	70.8875
	36.8921	252.444	16.9053	147.757	106.508
	-90.2003	14.5907	45.0252	150.64	120.361
	-15.4738	-27.6695	275.697	138.396	-50.3582
	29.4663	168.649	461.722	248.229	-97.0309
	305.359	88.0733	-30.2159	126.609	84.9104
	37.5741	2.61455	-2.81615	124.057	220.127
	55.3961	-54.8489	74.5446	134.417	13.0895
	-89.0714	-8.46901	-48.3893	131.046	-32.787
	503.531	66.1482	110.915	15.6731	0.352465
	54.2024	278.471	-1.97047	204.051	-36.5269
	34.8682	183.656	42.9992	197.241	64.0106
	103.488	254.531	-18.8944	200.003	187.624
	141.351	23.9412	-5.8133	147.918	514.605
	140.575	146.035	57.1347	58.1029	544.908
	33.169	59.4894	314.209	15.2493	556.112
	418.344	64.9962	212.835	112.598	543.542
	373.924	20.6214	112.851	2.37929	540.567
	19.9083	102.658	86.9929	97.2768	246.138
	32.755	178.171	96.7212	35.4528	490.188
	77.6118	104.173	257.954	102.966	-42.1468
	245.939	111.725	48.4324	48.8809	-5.62081
	-9.56011	175.737	61.6578	158.032	80.1132
	93.6898	-28.8079	-41.4982	194.721	57.2227
	108.432	14.0418	124.641	48.0661	-20.3841
	-80.263	96.6867	5.3545	556.754	34.133
	231.101	49.4376	-14.7828	568.77	126.889
	61.9423	106.976	3.61534	541.135	551.346
	-106.619	116.784	32.1423	245.053	138.032
	175.308	-57.468	-34.7726	221.118	66.0542
	-50.7095	1.20345	-20.2928	280.254	-18.0761
	89.3347	266.404	5.31169	127.731	139.452
	236.616	-53.9	85.6685	106.29	68.9064
	87.0613	-40.7381	13.3151	135.809	-90.8026
	254.63	409.258	10.7423	98.1994	553.318
	89.8859	28.0339	111.627	131.161	-88.903
	5.49538	51.8402	69.6381	177.476	-87.2804
	-0.99752	147.108	29.5363	133.397	246.531
	400.219	43.1052	60.5519	86.7625	38.9517
	28.2402	115.516	51.272	141.793	68.7843
	-42.9705	43.4381	30.1003	252.755	-35.0257
	54.5149	211.954	59.7937	116.514	-93.6471
	11.0061	31.6858	7.28356	179.863	-66.4798
	-14.3213	270.82	20.9256	254.42	-26.49
	-41.775	264.149	99.5329	255.336	203.754
	-88.8774	229.215	49.8259	263.115	149.519
	179.553	14.4368	24.3964	19.4066	162.756
	83.7005	196.438	117.785	287.087	-62.9107
	185.043	97.6134	20.9249	147.184	39.3712
	145.341	101.705	32.9948	283.854	67.0228
	215.481	74.921	3.62503	151.24	23.2679
	326.02	181.798	101.211	280.698	-0.118954
	162.385	244.895	38.8679	286.528	0.858979
	217.643	133.787	90.3182	142.064	119.558
	29.7767	130.191	95.9944	180.177	-1.76403
	21.054	146.521	-1.80457	12.7732	106.969
	168.326	111.719	84.976	32.8694	-47.6805
	10.6272	200.733	94.3837	167.161	198.156
	-83.4998	10.608	118.754	47.5988	229.301
	-19.0758	180.522	21.6941	2.66159	-30.0885
	147.023	86.4435	48.1779	-3.64288	-48.8279
	-122.256	26.9522	89.4488	185.326	-46.0081
	184.911	54.8791	87.0766	194.768	-10.5479
	233.376	-65.608	426.788	183.37	-66.829
	202.552	-21.879	46.5372	90.4599	-82.5666
	106.426	5.01746	14.9765	136.384	-16.7439
	197.696	41.7135	44.0832	-22.2894	-60.0651
	59.3762	66.3298	78.366	40.2149	19.7928
	198.161	-5.01113	75.021	298.268	-89.7655
	-15.0193	-22.4643	430.275	278.036	-61.8269
	196.414	95.3114	-19.9938	248.095	-39.9276
	-121.798	145.328	13.0604	260.63	-53.7596
	-60.1876	159.753	78.8365	64.7384	-30.7839
	198.411	205.13	343.998	88.0036	197.122
	87.0614	58.975	342.462	187.171	273.789
	195.066	93.2011	75.5987	305.684	216.468
	197.333	-31.5618	36.4123	136.548	387.672
	-131.82	-14.0611	50.6564	298.955	233.177
	11.8013	-6.15435	388.602	145.58	406.106
	-93.2057	-40.4031	58.96	258.321	38.1698
	-109.434	25.7185	-44.6421	173.273	242.451
	-101.065	-61.0276	90.3643	141.645	109.566
	-69.7603	-11.2702	-2.94587	126.712	25.9238
	202.879	-39.9517	45.8934	411.218	-51.1913
	-51.1145	28.2951	75.6313	187.106	-20.518
	-88.1786	180.056	-40.679	289.898	7.48405
	209.827	13.0168	6.89014	148.369	139.984
	-95.7318	-17.0117	14.008	276.024	319.934
	343.631	3.77741	75.3724	154.694	222.681
	277.943	-7.40517	74.4137	30.5603	151.565
	-27.5855	5.92541	93.1532	57.25	9.89224
	-109.289	28.5012	59.0148	0.755514	494.214
	-120.925	129.546	69.4202	290.613	-37.585
	-119.495	70.5	78.2614	68.6596	-88.3766
	-103.778	-69.7914	23.5539	76.6748	57.2117
	-91.6031	177.227	94.5747	77.5899	1.79696
	-104.3	10.4027	-22.0255	280.018	157.29
	407.174	-4.84881	61.9063	524.092	-62.2001
	-81.0038	153.919	55.0617	285.593	-64.8015
	-134.477	64.442	85.1175	297.637	-76.9752
	-126.049	12.2085	9.33637	87.4849	-73.665
	-84.9913	39.647	-50.5577	101.403	-28.4204
	-130.28	288.343	28.6908	89.9266	-49.4047
	-126.184	-36.7797	47.008	167.256	-25.0922
	-133.986	-22.9815	78.3102	26.8144	218.419
	-60.5054	177.161	92.6443	100.687	-62.2038
	-119.927	174.594	50.2219	177.353	-5.51517
	-106.512	256.541	-6.03967	170.226	-98.9758
	-99.3312	-21.9483	69.9617	22.1849	290.009
	-79.7157	60.8261	59.1102	177.119	53.9335
	-69.1021	-25.8032	53.3429	285.779	-17.2365
	-129.796	-27.6513	50.1485	209.247	27.6765
	35.3752	101.976	102.447	137.788	-25.4675
	17.5363	143.478	80.1367	191.577	84.6318
	37.1504	52.8338	20.952	334.944	149.862
	221.874	139.806	85.4109	300.15	12.8746
	114.969	-28.8234	84.5108	267.453	-5.31076
	28.3866	-39.7971	85.8441	299.014	-62.6508
	128.871	128.985	22.5552	283.234	-25.2137
	236.688	250.784	-7.71221	169.31	65.7782
	367.151	253.054	49.2944	49.1883	0.700024
	-29.8533	143.992	13.0089	-20.3243	-41.9484
	471.516	170.415	81.5016	-8.9437	373.165
	-76.594	-14.5914	39.9112	95.6985	-24.6482
	42.663	151.913	44.7729	259.788	23.3088
	127.418	-23.2114	53.7069	267.656	50.0289
	323.484	-37.7327	43.4297	86.4317	2.1044
	141.424	40.1466	4.76469	138.755	153.588
	366.054	-0.19716	-27.8187	300.609	183.165
	210.417	-19.352	-22.5012	-7.17894	176.922
	315.316	147.222	4.98857	-32.6036	113.891
	-17.7534	306.669	70.0339	7.87263	170.935
	387.487	259.45	94.0763	80.9411	246.79
	80.5477	140.453	-6.59804	-16.0242	203.126
	-33.76	218.376	55.1822	12.8214	164.336
	133.833	134.79	40.1399	131.267	186.277
	70.1874	-33.841	65.5999	-5.96374	167.64
	87.0528	-23.6696	63.578	-30.7968	205.914
	142.554	-15.4264	88.5544	-7.62239	149.643
	352.339	14.6674	-5.41411	-32.3977	0.125342
	-8.89851	-17.0918	-7.43372	605.404	58.8583
	150.66	-14.2322	-13.4417	614.389	-41.752
	114.562	253.39	-1.14114	39.0605	93.846
	-129.864	161.73	66.2942	33.5919	-18.7676
	-87.564	105.894	11.3409	48.4898	9.15746
	346.347	276.309	84.5991	130.705	19.7641
	-125.114	281.051	-12.3333	84.7703	549.184
	-12.445	-45.9406	-6.21846	150.752	319.844
	339.36	239.793	-9.29491	6.76051	-17.1034
	169.584	298.041	-10.1146	24.6175	-71.7129
	153.777	169.068	35.6726	89.3559	-69.5262
	109.532	108.185	70.8539	75.6536	-1.27559
	-14.7684	401.945	79.7579	421.357	-37.8755
	6.58489	124.588	-9.82255	164.252	-74.5078
	69.3589	185.517	37.627	169.276	-68.8391
	318.526	7.85705	-13.3817	63.88	-32.7485
	351.348	106.185	2.51124	69.6965	553.478
	194.901	109.718	38.4806	127.358	-47.3448
	143.727	-13.1319	79.8547	124.344	136.234
	53.6016	-18.7782	97.2152	151.097	160.068
	-62.3465	539.455	-36.0285	93.7933	83.1828
	135.574	149.542	22.4263	65.3961	144.329
	37.8378	-2.82081	81.3953	571.583	83.7889
	141.929	-35.2834	55.0524	118.325	115.351
	28.1183	177.034	88.1186	187.545	-39.164
	30.5719	15.1863	-20.6365	282.33	-6.32567
	18.3079	-33.1362	36.7933	-19.5945	109.346
	99.0325	21.9942	52.0652	144.573	176.628
	94.0395	11.8443	71.4795	157.902	209.247
	179.101	-29.6922	3.19237	158.046	221.968
	319.819	108.117	70.4991	29.4341	231.015
	59.6093	-38.2934	34.4879	44.4975	-2.0293
	-3.35823	194.434	39.5371	37.7266	10.6905
	17.6802	-19.9073	5.99634	79.736	305.673
	15.0845	104.251	9.56509	92.6927	-13.6594
	137.928	112.895	2.33022	28.5078	215.295
	213.231	141.261	-22.4993	24.0667	542.812
	336.188	-19.0931	-11.0368	117.045	291.46
	23.0768	160.074	-35.2407	133.998	23.3165
	109.325	11.7602	60.584	45.799	296.812
	62.8493	-40.1989	73.2669	177.932	-48.3049
	23.2017	-28.0649	84.1939	292.026	121.035
	168.292	-16.7851	55.6517	306.902	39.5511
	-43.8153	-63.3607	95.4139	289.276	-31.8117
	76.0049	195.915	0.244916	53.726	-33.4166
	328.4	-12.6338	88.7672	55.1119	185.839
	219.733	-3.27541	6.44995	68.3596	41.0683
	11.4117	-59.163	92.3185	7.24655	135.431
	366.759	5.66069	-14.0045	10.9302	184.382
	347.632	17.0356	-27.6638	145.731	130.07
	41.8416	-32.5323	53.0841	163.34	-31.0045
	-45.1183	-45.4782	89.1077	151.344	-2.17157
	10.1273	87.0683	45.5797	298.758	183.836
	227.197	-34.818	69.1635	283.952	-11.3436
	216.036	2.31155	-57.659	158.499	-81.7714
	177.966	203.876	4.27755	17.9942	-75.8368
	-73.4871	64.3993	-11.092	52.6268	48.5197
	123.385	33.0724	16.6576	293.162	33.4189
	267.409	200.008	10.1923	22.1835	63.7022
	-128.171	10.6973	68.3147	-0.92855	394.966
	92.4706	-26.4503	-7.75562	257.88	356.346
	-49.2492	52.0241	395.951	350.921	333.662
	69.2277	-51.1774	54.5185	1.42208	-38.2271
	88.4945	198.75	38.2474	298.209	-76.2051
	69.3788	259.63	93.0969	158.692	103.242
	78.7221	-17.1345	-19.8277	96.768	168.251
	-23.0875	73.0433	-49.2208	276.721	-8.19476
	-135.931	20.4283	73.4074	128.498	6.40795
	27.8887	-60.1985	-14.5847	135.799	67.0027
	57.9848	2.30214	100.8	128.201	16.5102
	11.3121	-14.1751	98.432	103.291	70.989
	96.804	-41.4797	6.6392	67.5039	550.409
	36.7466	33.258	74.1636	74.429	461.155
	245.383	-35.4528	101.613	114.608	424.806
	94.9564	63.9529	40.3281	80.7536	456.891
	119.788	264.595	91.293	29.8699	-0.0653099
	140.255	255.175	-45.7567	123.015	-92.0006
	124.224	-9.92194	63.6899	162.11	-32.9828
	117.664	42.6302	78.8653	207.968	185.845
	90.618	-5.49182	71.7813	242.045	68.6809
	0.101574	-11.2438	64.8348	297.816	7.36746
	97.6162	-35.7393	89.7228	114.844	449.742
	26.8795	-6.42235	87.3326	92.8195	-62.1505
	-28.7352	-8.69717	-28.8951	102.698	250.654
	152.782	205.567	79.9911	90.8557	460.58
	-28.2162	261.316	76.0328	88.9005	22.8638
	6.92196	-24.1461	95.9965	86.6845	-28.4424
	184.036	320.387	7.11859	60.9469	-4.54143
	309.741	263.844	3.73017	3.00665	196.901
	187.899	165.037	15.1969	11.6121	138.781
	116.292	-28.471	-57.7575	28.6165	239.875
	169.48	41.229	97.8652	19.8781	185.171
	26.6215	-6.21719	99.8034	98.0568	358.554
	-70.2612	22.4334	88.2813	289.747	47.0678
	21.7104	-44.1981	-13.4571	274.719	-86.0686
	99.9427	238.451	82.0026	162.916	-52.2576
	-74.047	-17.3998	66.1247	287.057	-39.0513
	-72.9578	-8.7557	10.1443	133.616	181.527
	-79.0954	102.582	79.2806	282.755	-61.4756
	-21.1138	145.372	44.1329	75.9741	112.667
	-46.9287	78.7635	97.2547	-15.7084	18.6937
	-79.1022	-3.25796	74.4995	17.5415	205.128
	-56.2562	-48.3651	-22.1076	282.482	106.936
	-61.5504	-15.6696	92.0508	303.327	10.6892
	-79.3228	13.8272	66.4469	135.46	-17.9695
	-49.0801	-0.90355	56.8096	73.1705	102.539
	-78.0644	-18.8963	28.8692	170.766	-68.6685
	-89.1266	-64.9994	61.6358	29.271	-67.7101
	-88.3343	235.513	12.3632	139.712	70.8817
	-49.7727	115.989	73.8203	31.5146	183.397
	-77.6117	42.1376	119.163	132.86	147.379
	55.6764	-33.2247	20.0737	173.285	207.333
	-94.9233	57.248	-19.4366	37.0059	71.36
	-37.9381	-9.15007	8.46398	131.164	8.28566
	-83.8919	25.548	98.0386	261.158	7.57572
	-42.0093	226.506	-2.23578	11.8199	3.03667
	-72.3439	209.919	75.0696	255.286	-59.6533
	-91.8395	13.3247	13.031	87.8957	1.34311
	-69.9988	-35.3388	45.5442	87.4613	-71.0141
	-73.7019	118.516	7.46889	85.85	319.769
	-66.2307	-18.1833	41.7509	66.8124	25.6193
	1.07578	-4.17136	61.3794	83.133	112.355
	-12.8158	-63.0924	194.288	30.7903	63.2011
	227.424	47.1408	90.343	129.892	517.497
	28.6524	274.117	86.2966	10.7835	78.8393
	-58.1913	15.0061	4.46077	154.643	503.937
	45.9527	-15.0327	30.316	-6.80028	234.457
	-47.1558	128.619	77.476	108.271	161.42
	-70.6877	-30.7198	84.3362	130.452	280.445
	-87.6853	6.86265	45.8414	27.6556	4.33693
	-56.0965	4.09509	-11.1819	48.4857	-56.4297
	-84.4025	38.5155	17.4573	85.4308	-10.1501
	-66.7757	-9.01807	75.7751	304.358	-12.7818
	-64.2491	-44.0374	-37.8908	295.285	-62.1797
	60.4496	-11.7878	72.6552	78.8161	59.0728
	-36.1973	-18.5272	-1.90109	145.767	-22.3426
	-61.853	211.575	74.7125	287.534	90.4108
	66.9922	102.963	57.3932	77.5344	563.762
	-70.5684	18.3139	99.2655	115.489	70.9976
	-65.1892	-62.5168	-23.2698	280.077	-56.7653
	-53.458	-18.1101	69.8147	150.961	-43.8061
	30.0147	-19.7605	1.09091	144.708	139.918
	-72.9272	244.073	-14.8979	617.144	4.15209
	-84.1713	263.305	-9.41446	140.222	38.2351
	-102.022	422.241	72.6844	27.2493	153.028
	-78.1633	-49.2384	72.1756	170.216	303.501
	-72.0449	27.6039	72.7554	3.13119	-24.101
	-81.7561	56.4594	66.7055	142.523	-3.45975
	-70.8942	5.54966	-46.6914	-27.0393	126.976
	-117.289	91.7779	57.5823	143.014	104.69
	-60.1733	184.387	-0.78555	28.0215	13.8247
	-108.513	1.25169	79.6453	29.1924	178.484
	-57.9779	198.414	25.5074	162.272	293.909
	-122.302	211.097	19.3807	224.633	49.1291
	-91.3088	337.404	59.4868	126.43	-34.1814
	-52.0304	-19.7045	82.0695	47.6703	-39.6361
	72.0522	-24.2733	68.0294	4.76295	-41.6649
	3.42046	128.215	-37.8685	151.753	-38.7266
	-98.5747	45.8773	101.422	123.83	311.932
	-92.6284	-53.87	-59.0325	159.036	70.2629
	-68.6668	23.4794	70.0235	97.4358	-14.0957
	-91.4212	-54.0219	7.19268	85.018	57.7902
	-79.49	-36.3656	16.4483	107.115	14.5124
	-58.3776	101.998	-7.20545	125.497	47.4304
	-94.5947	307.332	31.3068	148.741	-27.402
	-110.871	196.534	-23.3999	155.504	11.2481
	-111.09	-49.3763	61.5994	118.674	183.768
	-108.484	-56.847	169.242	174.16	-16.0551
	-103.304	17.0085	36.7932	123.672	-49.5987
	-101.183	106.125	50.9952	-19.3745	-63.4998
	3.12218	267.544	38.066	13.0725	-79.8331
	-95.3367	161.447	-4.82939	86.8677	-38.2085
	-22.2725	-7.63523	-4.00572	141.33	-89.1744
	-100.429	-28.4191	95.1335	59.7438	-78.4736
	-74.594	-11.0592	15.384	-4.19173	-46.3356
	-125.99	149.939	99.1003	-26.2672	22.3449
	-103.109	72.0132	42.6698	23.7082	239.933
	-118.742	192.668	-11.0459	16.4359	129.402
	362.606	-35.612	-45.3059	-32.8479	606.656
	-110.347	66.6595	-52.441	58.0606	28.5847
	-122.608	-14.0647	-5.53615	109.446	609.566
	26.5763	175.435	-45.4743	172.841	16.1107
	-78.3051	11.1966	-56.6609	109.708	463.114
	-76.0407	210.945	-47.332	112.893	-45.8202
	39.7422	-50.4625	66.5264	299.985	-62.3197
	-99.3119	372.771	89.0785	290.687	-89.7064
	152.704	334.182	128.805	90.9455	-37.3102
	209.601	72.544	48.6729	121.907	-63.6776
	-97.6012	115.245	-16.5315	65.7498	62.8695
	121.308	160.2	89.7014	45.8052	121.943
	-76.0642	167.516	70.5915	69.2264	12.2478
	-114.542	348.336	39.4196	81.0751	-18.9913
	252.65	43.6487	168.294	25.1979	177.793
	-106.688	-49.3584	17.2894	162.793	36.9392
	-92.4865	-31.1946	4.35301	100.156	-92.1599
	-20.7408	-60.6631	95.6213	165.337	-38.6156
	-123.973	166.175	27.3622	157.823	19.6995
	-94.8459	300.837	-52.198	64.5231	63.0502
	-116.297	-29.2532	81.5714	10.1564	103.643
	-108.471	-37.3098	104.324	141.522	-21.0929
	-86.9954	-52.8233	-42.9258	120.578	-77.5926
	-107.24	99.6379	2.1653	121.487	-4.128
	-69.7511	252.594	-38.8234	158.78	-54.6244
	-114.635	163.982	-43.415	115.05	20.3603
	-83.0968	-3.65586	28.6442	288.707	-38.4623
	-9.12961	-36.9011	355.416	50.6765	-71.6044
	-118.242	223.001	18.5901	51.5004	-13.2635
	-99.7301	-23.8447	-43.9329	36.6406	-100.498
	-77.6322	-47.9254	41.1905	52.5701	-18.0265
	-107.412	-27.3868	-31.8497	109.185	-62.9448
	-104.329	367.035	47.2169	36.7163	58.0759
	57.049	-17.9332	14.9047	318.507	-9.98405
	-84.5067	70.6403	132.725	165.455	-23.6697
	-22.9238	411.348	73.3929	188.761	87.7184
	108.026	49.3689	-28.3255	122.937	16.6019
	-115.306	378.706	59.466	106.02	141.008
	-114.864	36.4596	-37.1809	117.351	27.4632
	-116.437	-26.1719	11.3267	114.981	97.0515
	-114.532	-23.1805	65.0847	112.963	156.973
	-100.053	32.7958	-4.981	109.469	42.3125
	-95.093	-42.5551	20.6081	289.082	-35.6124
	-87.5537	438.08	62.1193	-4.03524	-78.8917
	134.089	298.636	80.5689	11.6333	41.1128
	-43.6755	194.066	5.13355	24.8932	277.998
	-100.336	441.685	-28.6256	179.949	-44.2056
	-96.057	178.872	6.2739	152.642	263.376
	-94.6433	151.179	72.9873	108.508	-62.1051
	-110.964	52.6833	24.7484	34.0082	-50.6007
	-115.744	80.0946	17.3061	98.0875	83.3415
	-118.266	317.492	10.7854	297.386	16.6546
	-93.8444	-27.0032	-51.8065	289.65	-70.1825
	-88.2966	-42.3996	-4.80852	312.908	-34.7425
	-49.0204	-35.9559	68.4028	280.81	303.203
	18.4512	371.534	-10.27	282.695	-26.1279
	27.8184	-65.589	45.4777	127.393	497.734
	92.3957	27.8816	23.7924	109.151	213.368
	158.637	123.282	43.321	113.61	306.783
	-135.757	223.53	96.4999	134.066	151.855
	249.54	-8.20632	15.8636	164.234	382.444
	131.675	-39.062	-43.9399	144.198	82.9001
	-38.2771	-37.4749	22.239	58.6156	268.93
	330.431	259.934	-11.2001	170.897	-72.5271
	286.918	141.952	69.857	298.428	-2.38847
	159.188	83.1627	52.0861	293.037	-64.1387
	227.75	-39.6165	75.0883	135.166	56.0625
	212.283	-2.55095	91.0981	59.8748	-37.0506
	302.853	29.1128	-50.1144	137.044	-57.256
	281.276	-8.45701	-52.3347	147.024	-81.3663
	100.077	-25.8785	55.4119	97.5098	-33.0486
	218.196	-49.4515	-44.5884	36.1924	-56.3513
	-35.6654	-41.6611	1.14138	45.7032	-36.5107
	373.236	-19.2209	76.8461	37.1385	168.44
	23.1002	34.1907	45.6782	10.1585	-52.8886
	332.507	-24.3638	44.037	61.9834	103.324
	-28.4447	-54.4008	28.1093	128.933	23.1758
	313.962	-25.5278	40.7153	178.363	48.6495
	-8.85959	-62.6887	41.8623	366.64	-5.83758
	305.849	323.359	14.3115	113.707	106.634
	346.721	44.7776	-43.3827	70.3617	-41.6139
	174.081	-32.1945	55.4265	74.7642	12.5685
	2.38888	26.7325	86.2406	286.834	-21.5129
	68.5045	42.9752	79.7839	287.737	-90.4909
	-60.46	-47.6032	50.8638	205.276	-77.2798
	-53.9636	-50.1047	56.4749	57.3623	-13.5491
	211.714	118.709	60.5968	151.338	26.8499
	314.441	-36.9537	94.3755	124.937	-58.214
	-77.232	19.9497	57.2911	56.6208	60.7864
	-62.2152	-30.0478	44.1965	105.211	-91.6272
	208.296	263.18	71.271	78.9901	554.533
	37.3982	141.107	33.3106	15.2638	309.956
	-35.0849	4.81628	15.1941	57.402	22.6137
	58.9292	86.6498	56.575	49.2944	-80.7893
	264.442	-13.4643	70.373	76.7965	236.962
	19.988	-15.8798	58.9984	317.134	-70.9306
	181.735	63.1859	70.8513	144.059	-33.6575
	-28.3712	83.7532	45.7046	170.129	111.494
	-34.8059	74.3703	46.0988	164.532	245.081
	300.355	39.3939	77.3992	94.9158	54.8859
	359.097	73.1355	84.9891	130.899	6.7982
	195.412	-23.5494	48.7958	78.1695	-51.9264
	321.51	372.004	-24.4797	61.7098	124.516
	32.5958	142.959	391.593	633.779	42.6169
	32.7707	37.3656	61.0757	213.787	-35.5544
	96.132	352.409	12.2953	304.764	-24.4435
	-93.0201	-15.7511	64.0098	313.577	-15.777
	-14.0282	-21.8961	76.7808	92.6408	-41.2318
	143.81	-25.7023	68.5994	92.1175	-81.0666
	28.7723	40.7858	72.5564	99.7394	-13.6589
	-23.3009	17.061	40.8123	95.4944	17.0664
	-65.6033	3.25244	54.8826	132.034	548.208
	45.0317	-62.7319	40.8077	42.1952	-37.0217
	20.1499	11.2973	50.0086	83.2436	-26.554
	41.4847	3.84316	46.3644	119.237	-30.266
	-110.215	9.5714	64.4052	80.1965	-24.3252
	-54.7238	-34.49	64.209	146.211	60.7322
	-107.67	3.63052	49.7888	108.185	-49.213
	-12.8216	6.56389	75.7484	206.484	20.8259
	196.389	30.2103	65.2345	99.5353	-77.2824
	360.196	15.7948	46.8401	95.6318	-5.6432
	4.97966	25.0101	76.9337	118.936	44.5455
	0.909725	10.704	168.134	107.688	44.6176
	195.429	2.47871	106.57	104.683	184.848
	50.5324	-6.82643	71.1915	93.0277	119.753
	214.269	-10.9249	76.9119	131.155	-3.70503
	168.774	7.96427	71.3258	76.7624	-12.736
	-33.6177	29.9999	71.9762	84.8936	-41.5793
	-79.49	-3.70448	64.2566	71.8784	10.0197
	-59.5692	17.8918	59.9015	156.143	-62.4568
	-56.9467	85.7522	44.488	180.569	-4.39832
	-37.4569	25.5888	67.4706	117.549	30.6875
	-51.6159	-60.9798	85.9218	27.7983	-25.5163
	-42.5309	-58.5471	76.9718	-14.3533	265.022
	171.561	100.514	50.4716	-1.13611	5.1031
	132.162	38.9794	31.7143	64.5832	1.76998
	-0.94912	42.0794	62.6882	147.011	555.01
	330.906	234.627	91.7883	62.3648	-31.9882
	186.287	85.005	82.0255	26.2972	32.9074
	223.961	-24.691	81.5021	-7.15813	23.7036
	129.015	225.774	77.4339	-18.5923	-87.6666
	321.71	453.685	151.524	135.459	278.992
	292.108	-19.4115	81.4613	155.628	-12.6148
	219.441	-0.94158	114.688	-23.2603	-66.2864
	162.99	30.7707	158.409	85.5789	186.736
	-25.616	143.63	161.452	-14.6947	-54.0435
	58.9047	215.191	76.9752	-38.0491	-101.843
	5.68112	-2.1034	104.404	20.2473	202.767
	134.459	20.3653	106.266	0.839152	275.305
	-45.3868	242.201	106.188	-10.3784	333.515
	-4.10154	53.7989	158.037	0.52771	299.966
	24.9298	31.9931	107.001	20.2507	148.351
	30.2845	39.0465	50.2024	1.18655	-52.4742
	56.5936	4.54385	132.415	-40.8533	-7.68676
	10.5572	153.324	46.821	-13.9288	46.7179
	50.531	262.661	38.8662	-3.77476	-11.957
	24.9525	17.7959	28.1056	89.766	-76.8406
	-17.2746	24.0735	112.05	-12.0666	-45.6306
	26.1161	15.6704	175.263	29.9306	-1.58573
	-85.2335	11.5741	73.8293	29.7987	-7.97766
	40.5961	1.34503	127.01	173.087	-4.74351
	-3.4082	202.271	6.40342	160.003	94.4424
	-38.8784	80.4687	75.2074	195.606	38.588
	-30.2994	11.1423	23.2125	102.309	-62.7252
	-25.5792	-11.6957	99.4341	117.849	34.6826
	-17.7709	171.334	61.1213	35.4038	-59.4346
	57.1878	273.18	41.3294	96.4908	-6.56007
	-92.3369	202.459	30.6852	37.7648	239.334
	89.1069	459.652	55.9441	-12.444	-30.0512
	173.293	-0.50198	69.3212	-7.11867	-68.5848
	162.645	435.153	37.5306	-54.5918	-49.2482
	-67.5436	326.41	56.2915	15.7609	-61.1021
	-78.5816	423.482	69.6967	-55.9349	86.9506
	-3.03599	468.489	33.055	29.8505	92.7423
	-22.3144	283.737	51.194	-56.631	38.7599
	-49.1257	350.685	45.1481	22.8718	-81.6485
	-56.7185	398.832	17.3555	90.0294	-11.1984
	-12.4013	48.7863	49.6567	16.7319	-46.5449
	-75.6994	151.892	65.3178	-64.6719	79.0084
	33.2308	207.787	55.4018	22.1281	-18.3778
	100.048	50.051	63.4584	54.7336	-93.4539
	1.62284	78.9268	57.384	-42.8008	-43.0129
	75.821	185.937	109.521	16.3498	-9.21922
	208.208	201.333	56.8397	-49.0738	18.5621
	167.534	190.559	83.2516	43.391	55.478
	160.345	111.112	52.472	101.771	-62.0757
	76.1856	50.6466	78.6076	124.16	-16.0135
	137.751	51.2803	58.5963	-59.8971	33.5868
	54.8327	17.4078	33.7469	-39.449	180.368
	20.2489	245.207	78.937	13.17	127.529
	126.892	242.572	54.7562	7.25142	111.307
	-29.592	228.232	52.7777	28.8425	-57.2656
	29.9234	31.2596	58.4485	-4.79454	148.292
	95.5027	196.376	70.3243	-8.35998	23.2346
	115.199	6.59712	53.5148	-46.3319	220.38
	548.505	-6.02647	42.0205	-40.9787	130.864
	126.504	41.0295	52.0448	-4.90573	230.402
	-17.4415	33.6945	43.2708	83.219	227.383
	-58.5997	66.2374	52.9975	255.917	-42.9954
	47.5168	60.6577	29.8478	10.2622	-86.7184
	-40.2007	59.622	59.5577	-53.7559	81.0502
	70.6731	76.5524	86.6912	-3.95467	-16.2058
	-4.30636	44.7252	67.3435	-32.9724	213.45
	-83.4315	66.4027	65.7067	52.4427	-35.8637
	-47.0262	43.8603	73.3331	9.57169	19.4785
	41.682	52.2659	99.9094	76.1472	132.917
	67.3073	226.753	77.2097	-44.2531	84.2286
	155.365	7.70302	71.4128	85.8892	7.21557
	23.0788	75.3514	85.9699	192.886	-44.4329
	-31.6804	39.044	57.3833	20.6081	-30.9649
	4.61276	59.5693	47.1688	-12.6625	16.5325
	-102.232	38.2864	45.754	-34.4801	-49.5879
	13.6907	14.497	61.8044	15.6046	-28.8008
	12.2478	48.9802	48.8182	-16.076	-19.3317
	-46.6295	45.4627	71.4964	-5.04443	8.28151
	40.9686	49.1734	44.2216	-23.9513	-50.8128
	-65.9603	260.491	60.5131	52.1649	58.5891
	-1.64201	13.5694	75.2741	-11.3685	13.3861
	-89.9367	207.274	42.5219	134.453	-78.0719
	5.21952	72.7159	65.5137	-57.1579	-39.1408
	-16.9692	198.655	42.4718	13.7431	115.849
	-91.2123	23.0923	27.7885	-54.7993	57.2996
	-43.2538	213.164	57.5508	24.5938	239.717
	-15.1802	165.421	71.9541	-43.3137	296.689
	-46.4855	231.793	68.3178	40.6034	-29.0116
	-50.3708	97.174	56.6351	50.4612	86.5587
	-84.2857	-25.1413	54.3977	130.07	71.9835
	-9.66949	-49.7268	370.054	-1.82845	178.592
	-74.0406	-4.32528	33.9879	-0.55968	-57.5568
	-75.3146	23.8317	62.9365	3.46498	-66.8338
	-104.115	-0.43314	62.4707	72.8242	19.4028
	-64.6258	30.0534	72.4699	4.72246	43.1867
	-7.5938	16.3294	44.7964	4.9634	108.055
	-53.0982	28.5666	41.5188	14.5764	254.128
	28.6727	25.5784	42.7729	17.204	-63.2214
	13.743	5.88139	29.0994	35.3994	24.9128
	-37.2102	239.312	41.9534	-39.286	162.494
	-49.0915	221.156	52.4153	48.4919	-82.3411
	-87.5366	11.836	37.9985	-64.6104	-39.1747
	-31.9081	176.386	347.168	-26.1792	108.899
	-17.8178	211.24	29.8283	-31.2807	27.4317
	-36.5102	240.2	63.1235	49.2226	-39.3437
	-15.2835	205.567	39.3397	0.331201	20.5493
	45.5482	450.948	73.5413	-5.87337	-51.47
	-30.5908	24.0551	45.807	118.786	147.54
	-84.0054	-56.3495	46.4483	74.422	291.468
	-43.0263	-4.99734	548.884	16.3697	-34.6643
	-28.4166	4.11156	73.6434	50.3247	-81.0933
	-62.7983	17.3065	197.014	4.81439	-34.6377
	-77.6157	250.697	64.466	22.6053	-68.3641
	-68.8983	266.498	81.3535	191.785	124.306
	4.29087	273.455	26.2935	21.0668	111.397
	71.4788	65.2477	42.2341	26.6383	33.0358
	5.59699	266.427	65.7757	393.162	281.972
	-40.272	94.24	58.1669	18.5684	161.185
	13.4395	28.9046	46.2077	62.742	-68.2633
	-88.7539	244.614	34.2116	-13.5085	83.1439
	-26.3677	18.8838	209.665	74.6938	124.484
	37.6848	22.755	73.4047	-40.5807	-75.8495
	-29.3407	14.7913	29.3712	49.8849	-35.7098
	-86.9756	63.224	69.514	-48.5724	-9.57783
	-27.0669	72.9599	104.189	41.667	-91.6194
	-53.2555	46.9293	55.199	-10.5184	-93.9308
	91.5757	49.5482	51.3997	29.7158	-31.5183
	-42.9426	52.8449	31.1395	1.70111	-3.82864
	-63.8371	40.5757	42.2679	-16.1085	-71.1185
	-52.312	-1.96697	16.7887	-1.67315	-48.0319
	9.87858	-20.9976	57.9151	75.4428	6.78094
	34.566	-13.9785	62.4751	19.5497	-76.6671
	50.27	82.1426	74.9876	217.241	-59.743
	163.442	43.5338	56.1995	129.118	545.031
	224.751	30.881	55.5333	111.724	4.66799
	-34.1027	-41.5309	187.016	131.295	-26.9684
	78.5227	-72.7072	12.9479	11.0851	17.1827
	212.172	-5.11052	51.352	9.51617	18.9785
	99.2247	21.8875	31.4606	16.618	-50.3638
	-15.5492	402.81	192.166	25.4085	-22.6843
	62.3416	217.752	55.203	-57.2108	-64.0586
	174.844	183.717	75.9134	85.8163	-8.68438
	-73.1614	373.971	67.8741	135.757	-94.7436
	-43.5782	19.9742	44.4023	43.2393	-56.4333
	-27.339	182.498	5.09588	110.941	-69.3503
	-8.82348	14.1878	60.7086	50.5897	554.636
	66.9899	233.756	248.276	151.994	99.8065
	519.834	142.027	46.7037	111.33	116.887
	-13.7106	156.88	45.9136	21.8605	30.3027
	-2.26038	-10.1347	75.1158	131.122	455.376
	71.6971	240.498	62.3215	-1.64428	-45.2657
	244.356	10.7049	436.906	124.126	-67.1895
	145.91	7.70461	68.7909	-8.29443	51.4299
	174.64	255.902	42.9252	38.8005	2.79217
	5.32582	233.269	59.0368	146.925	63.1833
	22.7334	257.395	78.2294	68.6683	23.5691
	157.891	46.3995	26.0925	141.22	136.622
	232.849	27.9831	60.5595	82.6453	63.8445
	104.442	250.503	18.5005	1.27646	58.7585
	248.857	125.409	26.6558	69.5287	140.022
	176.744	51.4021	73.5044	150.284	262.654
	126.588	34.9493	57.8595	-14.8676	-52.9377
	113.114	9.00245	84.3031	-55.9461	574.044
	96.1807	13.5815	51.8423	95.5825	42.5898
	199.693	85.3367	79.6511	-3.43367	231.784
	166.737	46.6591	63.0937	95.0684	-65.5213
	179.163	100.832	97.2305	1.20865	11.8538
	177.684	88.8097	40.4258	18.234	47.7054
	89.4826	233.063	193.483	12.1903	121.404
	196.483	233.547	147.829	85.5215	103.535
	156.888	47.9981	181.219	-28.5372	118.09
	130.01	39.1233	80.1253	90.9453	240.926
	153.456	-15.3524	40.9872	132.03	80.4259
	147.467	-34.716	461.771	-12.3686	154.551
	174.095	-3.25547	57.6142	58.1509	195.297
	221.164	61.9001	38.3795	123.995	47.4689
	143.181	162.246	83.9791	120.091	161.235
	258.114	492.411	25.8679	21.3405	82.2411
	214.978	51.1541	43.0344	-40.7477	70.8902
	188.48	191.686	147.271	22.5786	43.3467
	192.238	119.686	28.6837	42.1945	187.756
	226.449	18.6853	60.8411	-4.05413	-55.9842
	159.593	62.2272	55.8445	24.5226	39.6381
	165.931	137.725	83.0439	-39.3953	83.6877
	236.66	207.155	24.5537	34.5924	27.2172
	169.029	38.4147	38.079	-30.2848	-62.3269
	196.716	130.599	55.3621	-35.8464	255.255
	138.185	57.6763	54.8355	44.5781	283.551
	116.017	244.699	45.8532	-12.74	121.62
	101.312	97.5738	33.0674	46.8488	550.651
	-46.359	69.9659	15.2532	24.387	-23.3931
	-68.8959	7.20995	171.885	4.05135	67.994
	116.148	262.636	203.638	93.1202	-64.4182
	78.4701	224.721	226.402	-5.5079	28.8143
	66.3611	264.698	86.2655	25.1628	55.4391
	85.3987	131.765	49.103	-13.4934	18.4164
	127.97	46.1815	30.5146	-34.528	639.092
	106.635	66.2754	44.1466	-46.6949	-69.8376
	46.1492	28.9737	224.876	31.6019	-93.7485
	127.015	-21.2043	217.926	127.154	159.337
	141.412	19.3871	13.9283	25.8773	-10.0055
	31.1578	27.6935	15.4578	-28.6684	-19.6802
	39.6243	14.9687	7.31842	61.242	146.781
	223.725	23.9142	46.5902	158.074	104.577
	117.872	-20.8948	51.8461	-8.37156	-48.611
	118.208	28.7264	41.1733	142.798	-59.7043
	150.119	1.84206	40.4487	105.369	279.097
	113.817	33.179	23.0464	-20.0284	100.059
	-4.39423	215.994	29.8004	-14.597	366.558
	424.768	145.222	83.1965	54.9616	-97.1148
	51.4134	80.9045	33.685	24.143	-28.8959
	186.723	210.085	91.8145	16.5569	-46.6353
	-36.5842	23.5524	28.8291	-1.52431	-78.978
	358.664	0.937236	7.75554	92.2048	252.674
	91.9525	-55.9532	31.9585	24.0699	269.239
	78.0974	150.69	54.0335	-6.4191	205.749
	154.823	47.9881	49.0906	-4.58343	-25.1331
	175.421	31.3376	30.6771	-51.5707	-26.3482
	56.8595	12.9877	71.5343	-21.6485	-38.83
	133.66	169.934	72.9296	11.2022	144.737
	222.481	7.59419	193.878	30.818	84.2236
	126.762	71.4681	199.031	2.95038	254.649
	176.824	547.882	170.013	145.353	254.312
	129.381	47.6815	62.9047	18.0982	23.0013
	106.341	213.309	306.413	33.8695	146.759
	97.9237	216.235	19.0507	156.992	6.58458
	70.4452	24.2745	8.10817	176.992	-45.3059
	97.8532	203.672	281.55	139.477	0.489664
	147.664	32.7501	58.7696	152.06	18.7481
	116.906	207.893	28.7666	150.094	-38.8586
	149.366	138.62	41.5274	146.478	303.019
	164.43	236.119	41.7792	36.0356	144.343
	173.192	229.65	325.206	33.0921	174.976
	9.86683	519.924	314.501	104.178	180.638
	51.6151	501.786	48.337	22.9766	139.208
	152.286	-50.6356	27.5678	-5.16775	135.083
	173.68	50.2824	24.8862	92.3506	162.593
	-32.8408	58.6915	78.9386	75.1691	146.07
	66.8528	34.8655	78.9883	160.53	139.699
	217.188	29.8882	67.1086	6.15551	556.852
	238.164	-69.7854	24.3522	-16.527	560.298
	233.544	-41.8892	18.5038	-15.9062	331.827
	781.055	50.9766	77.8598	131.459	346.644
	181.657	87.2177	322.771	117.444	270.176
	222.982	52.7349	24.6548	171.916	88.1799
	507.63	68.9963	29.708	-36.6502	59.128
	175.299	27.0713	61.0626	18.5462	124.537
	181.592	196.672	55.0992	36.1636	48.4399
	154.812	116.577	46.623	30.2005	156.308
	185.403	93.99	48.0424	-0.54495	131.44
	-92.1128	29.0045	34.9115	37.8239	88.4443
	170.738	50.7711	273.133	199.411	-55.9986
	150.242	-3.20424	25.1607	182.996	-49.9847
	161.255	4.12766	45.2285	63.3426	-99.5576
	201.891	47.044	271.147	43.2647	73.4955
	269.148	223.668	74.7891	72.632	167.797
	233.066	-2.51758	24.5412	12.0756	257.579
	166.881	-14.0369	200.697	23.0612	-70.8995
	141.947	-7.7823	262.038	32.8528	-7.49607
	101.88	47.6953	260.768	183.643	57.1967
	269.404	198.372	256.557	177.898	-89.117
	349.276	228.059	265.617	88.4776	-4.15719
	87.4926	192.472	39.1606	180.942	148.941
	207.642	248.595	102.646	23.9854	155.431
	0.201811	145.868	43.5913	27.9844	43.3664
	109.85	181.274	51.7103	14.9583	13.0223
	187.525	292.627	193.56	26.6623	70.4471
	100.013	66.5005	61.4772	17.948	85.9156
	493.071	234.455	70.3654	65.0574	257.637
	-64.6241	30.003	288	41.4799	130.752
	-17.4183	191.955	73.7748	-10.9765	102.829
	75.3229	317.599	35.4214	-1.72432	162.399
	95.5695	250.616	188.99	0.658174	225.448
	108.65	225.31	36.6527	33.8992	290.794
	102.973	2.29057	73.0798	23.9223	-58.1933
	93.7285	223.216	164.355	32.7705	72.5982
	29.3924	45.2133	158.163	22.2264	54.1191
	63.29	53.0962	227.794	24.6047	10.7926
	46.231	75.4852	279.17	22.946	91.7327
	67.8499	154.771	80.8123	38.9541	43.6665
	-68.6852	0.092693	92.5681	20.2462	-76.6717
	28.0075	33.3341	291.905	30.0962	130.942
	94.5164	40.9861	47.6908	7.52742	36.8566
	166.038	176.043	61.5772	32.8991	-62.664
	76.4746	76.0167	59.6837	-42.3264	-58.491
	132.399	45.3661	66.6591	43.5904	-29.6985
	103.669	10.8527	36.694	63.7582	138.779
	147.223	94.6287	35.4093	2.26128	145.365
	-59.4721	243.773	57.075	34.0749	179.804
	-12.5711	5.34284	44.0395	27.5803	18.4866
	131.359	37.0123	37.6993	28.3726	161.531
	-53.73	19.8952	29.2107	49.6289	277.504
	101.292	44.207	189.924	251.582	110.721
	166.515	99.704	167.955	259.237	-43.1253
	191.386	-0.47538	13.6654	247.028	-78.8587
	174.726	56.7559	149.403	279.212	171.932
	112.844	13.0764	141.238	-28.7831	281.823
	226.282	47.3308	79.8612	-2.17719	531.16
	31.5768	59.4835	17.8944	35.6331	117.025
	101.597	33.043	48.1629	25.6325	-32.1683
	220.018	37.8895	58.8547	-4.75782	-45.5119
	76.3326	35.2672	28.9033	78.617	67.3456
	224.775	56.3983	36.425	34.6655	-80.2849
	-20.1296	-0.6663	21.2386	14.9048	6.96348
	435.6	89.1478	63.2523	255.315	235.588
	-25.7719	56.9404	51.6132	72.1234	232.107
	35.7628	42.4633	36.0147	20.8722	-99.5124
	181.977	77.9691	40.9038	86.9466	111.912
	93.2853	47.3479	52.1729	47.1666	-44.1609
	-60.2183	30.7518	49.405	18.3587	271.185
	89.3777	234.695	20.5415	139.815	302.933
	45.6507	16.1119	65.7413	38.1766	74.7718
	-10.6639	10.5877	44.8109	223.417	92.1304
	-90.5468	24.5674	41.7539	166.22	49.081
	-2.67848	44.8626	47.2218	223.267	-24.3993
	397.473	233.145	34.8128	78.9055	54.2007
	166.807	35.9968	26.1202	169.465	-23.9971
	60.6013	52.4739	66.992	40.5762	97.3971
	72.6598	14.8739	33.382	11.9842	-17.9915
	66.7719	-20.4034	41.5528	29.2826	23.0928
	34.5616	27.6896	165.557	173.473	51.3907
	156.508	10.5602	203.989	80.6289	131.877
	76.2501	250.816	183.102	108.78	317.319
	4.77126	237.959	449.479	-22.9091	273.439
	254.407	266.036	-11.059	-24.8157	-32.9065
	82.0537	63.1097	18.2296	-18.2166	85.6011
	41.1347	90.9721	36.5371	-8.70337	17.6114
	-56.2297	34.0615	26.4828	-0.39848	79.971
	-7.87364	45.3756	62.5815	97.5376	38.1267
	117.938	41.1114	181.985	26.4479	-71.8459
	104.026	-67.0244	46.3013	245.157	118.851
	-45.9575	260.592	56.839	-8.99962	180.486
	180.052	271.009	14.5006	22.7689	129.104
	155.55	5.23787	27.8025	137.843	78.9856
	137.268	509.06	57.0846	73.3171	161.416
	138.244	43.6155	44.8264	30.8194	97.8362
	39.5921	54.777	61.7014	106.865	14.2484
	31.7754	45.4421	35.2421	42.1378	188.262
	-61.804	253.119	30.4878	36.9468	-84.2774
	-66.7112	514.469	37.4165	217.21	272.765
	58.0049	212.141	53.8891	156.935	129.903
	80.8456	228.676	36.6888	176.745	473.799
	12.0005	34.8975	80.4442	170.849	279.886
	147.407	51.4353	27.8723	175.803	137.625
	426.884	521.984	23.2448	131.102	151.182
	66.6595	6.69495	31.4871	195.189	302.139
	89.4961	-5.66218	138.786	11.8767	44.1611
	36.7188	6.92418	32.1005	191.557	-16.2942
	-89.5142	-58.2457	52.0833	21.5433	249.276
	208.858	14.7186	159.14	215.501	217.589
	11.5418	38.6039	85.8706	243.2	206.88
	121.604	8.59853	18.0937	142.446	370.512
	126.573	238.853	36.637	87.1796	121.447
	176.696	34.1075	30.8058	204.839	218.058
	-95.6856	47.084	46.9856	62.7866	237.92
	112.743	46.3876	130.367	194.938	431.324
	-76.735	50.4149	100.099	17.6165	36.4982
	134.023	186.397	55.402	65.0866	538.375
	80.8804	41.9826	41.5445	19.3623	441.52
	108.827	-12.3455	49.6037	20.176	512.235
	121.611	187.653	36.2411	11.5988	575.457
	-75.8355	182.817	56.9543	12.4368	-89.8344
	-66.2364	206.634	22.713	170.007	-18.0674
	255.789	215.824	40.8214	157.128	-36.1064
	4.71172	-15.2028	25.7369	160.353	-30.8846
	-0.46659	300.412	48.2802	180.051	0.890558
	13.2716	187.339	188.718	189.831	-36.0714
	-44.7969	-9.23044	33.0166	358.573	-72.1978
	178.531	0.378833	45.5082	632.962	231.161
	141.656	26.7312	43.9562	146.405	-7.30247
	249.816	232.118	17.4612	24.8832	126.283
	290.191	-5.19142	34.7831	215.164	255.268
	138.846	127.889	55.6061	-13.8688	191.579
	27.4547	200.703	54.7963	-5.49952	179.036
	-73.7413	-17.2623	41.9173	-23.7126	12.7649
	-15.5823	23.103	50.0232	47.1658	195.246
	-51.3275	23.2455	26.638	-30.5996	313.307
	-39.3696	256.318	32.2027	42.1847	311.728
	-54.7416	244.984	13.8359	32.453	-88.6904
	39.774	-10.2868	60.4796	149.874	-30.3748
	16.4822	510.379	213.456	53.9549	130.759
	486.762	-26.8231	30.9161	-44.1981	232.903
	264.146	10.156	34.6268	71.4107	-69.4127
	27.8736	198.028	38.7297	5.91811	-74.9548
	90.1511	26.0131	26.0333	25.9595	2.33006
	23.8014	47.7777	25.8055	-9.36206	-95.1808
	-4.75339	-18.5833	35.0342	15.5387	13.6451
	12.0043	117.192	49.5099	-41.9459	-33.796
	-54.6938	47.1109	52.5926	-60.3759	-29.0729
	229.519	-82.5136	61.687	-8.26334	78.6248
	45.1205	33.6129	48.183	-32.602	19.3241
	3.33099	36.3771	44.1665	-23.3835	304.304
	252.345	21.2708	72.5685	223.015	37.1662
	58.6922	188.731	55.2236	193.793	319.78
	-90.0527	3.87538	45.7771	173.222	101.445
	213.694	177.09	59.7485	219.192	142.938
	-76.2725	132.22	19.9575	32.4957	207.782
	68.0981	199.213	58.1927	154.135	186.432
	-18.5795	-10.4235	46.7714	3.91813	-70.2866
	46.1003	12.9022	32.3034	21.6241	50.8449
	-96.8051	-15.3088	27.3004	4.59587	108.282
	283.983	520.47	30.0812	-20.2164	218.383
	-1.96749	549.676	47.2653	6.96945	30.9354
	22.2245	149.152	113.756	-22.5273	4.79323
	22.8344	-1.5449	185.208	-19.4494	64.1284
	38.7027	22.4096	56.6503	6.82837	97.164
	44.8609	537.408	31.9773	235.079	470.574
	99.974	131.751	50.4578	219.932	-24.6585
	69.2016	17.9052	32.2067	245.801	-30.8658
	78.1542	-5.12969	99.2165	263.476	-43.6445
	-35.1007	-46.5559	28.9217	170.301	265.295
	-60.5468	27.7102	77.313	-27.4048	16.9125
	120.877	-9.64199	58.7485	42.5671	20.2907
	36.4499	3.45255	25.8647	28.3914	-3.30612
	-24.9507	-16.0191	40.875	-16.2315	181.025
	47.8632	-6.14573	52.5348	96.934	38.4294
	-30.7576	-39.2634	35.4054	13.9265	47.1729
	-58.9239	7.47412	433.55	157.785	157.031
	61.9951	83.2414	85.7153	93.1947	237.014
[truncated: 169,561 more rows]

## Sheet: Figure 6H
Ring	Homer (every column is 1 ROI)
160-140	0.257669	0.60591	1	0.892074	0.905882	0.341969	0.513557		0.257143	0.303773	0.58075	1	0.279412	0.737105	0.137047	0.527559	1	0.250784	0.112925	0.44459	0.002863	0.041683	0.844726	0.398616	1		0.704279	0.57299	0.052446	0.062528	0.175701	0.364316	0.04682	0.829048	0.090855	0.622921	0.249257	0.427778	0.540484	0.530769	0.957996	0.270729	0.333953	0.037513	0.028856	0.15547	0.137321	0.150898	0.03849
140-120	0.590373	0.765139	0.761047	1	0.918552	0.422479	0.552079		0.586081	0.305806	0.770296	0.300468	0.307353	0.728747	0.341976	0.739552	0.803477	0.413552	0.197802	0.864817	0.075979	0.102465	1	0.577322	0.856463		0.79922	0.859758	0.096643	0.138155	0.318116	0.745809	0.159569	0.734337	0.235085	0.694172	0.607294	0.515867	0.581887	0.463052	0.546515	0.724841	0.737632	0.080687	0.089935	0.640484	0.378727	0.356518	0.090117
120-100	0.93865	1	0.667311	0.850755	0.860963	0.508714	0.578512		0.896104	1	1	0.333192	0.426738	1	0.428463	0.951324	0.853051	0.607011	0.304267	0.946945	0.288901	0.222418	0.827771	0.741743	0.657216		1	1	0.199609	0.250957	0.361937	1	0.414415	0.601267	0.512719	0.724348	1.02002	0.718529	0.648421	0.532147	0.553156	1	1	0.100639	0.109453	0.984645	0.755111	0.687534	0.277212
100-80	1	0.897163	0.425532	0.630474	0.777778	0.745538	0.683147		1	0.150495	0.305955	0.060826	0.46174	0.519901	0.399257	1	0.75723	0.747126	0.354875	1	0.72529	0.543689	0.585091	1	0.524055		0.807713	0.856735	0.328767	0.385809	0.495327	0.883369	0.857932	0.350618	0.801586	0.399883	0.501259	0.711876	0.630721	0.659627	0.396659	0.974711	0.817844	0.147808	0.161968	1	0.973153	1	0.474589
80-60	0.667835	0.774569	0.410334	0.332713	1	0.877128	0.803144		0.911565	0.062741	0.095451	0.050691	0.680749	0.594254	0.471548	0.92126	0.821918	0.967309	0.497085	0.771429	1	1	0.391802	0.965398	0.29271		0.510528	0.596233	0.554375	0.605322	0.805073	0.5087	1.1122	0.122944	0.896988	0.158589	0.199322	0.402034	0.400175	0.527834	0.311521	0.574501	0.411843	0.22761	0.269367	0.505895	1	0.81095	0.722293
60-40	0.371779	0.530496	0.446809	0.17785	0.576471	1	1		0.638095	0.01464	0.020703	0.010339	0.86052	0.476019	0.752089	0.670866	0.452055	1	0.657143	0.295082	0.867485	0.913398	0.197468	0.940484	0.224227		0.097623	0.442122	0.845401	0.899335	0.950467	0.169231	0.865615	0.038249	0.731614	0.146823	0.111621	0.167657	0.177699	0.377787	0.334132	0.31147	0.318959	0.49052	0.569154	0.186564	0.773684	0.481437	1
40-20	0.116564	0.650118	0.638298	0.112921	0.411765	0.958549	0.972887		0.428571	0.006971	0.014719	0.008489	0.822038	0.447648	1	0.535433	0.239726	0.527691	0.904762	0.186885	0.271984	0.566343	0.182841	0.643599	0.231959		0	0.318328	1	1	1	0.052885	0.644516	0.026562	0.639005	0.095495	0.050384	0.079837	0.078155	0.256009	0.24034	0.137993	0.258984	0.989806	0.78607	0.086372	0.49681	0.347305	0.951046
20-0	0.092025	0.429078	0.319149	0.169381	0	0.803109	0.956938		0.095238	0.004183	0.002472	0	1	0.315597	0.601671	0.590551	0.136986	0.329154	1	0.029508	0.014315	0.380583	0.164557	0.560554	0.463918		0	0.141479	0.710372	0.824834	0.981308	0	0.396954	0	0.5927	0.089526	0.034881	0.059877	0.02468	0.16606	0.29896	0.078853	0.245353	1	1	0	0.401914	0.125749	0.936099
[truncated: 83 more columns]

## Sheet: Figure 6I_B2
Ring	B2-adaptin (every column is 1 ROI)
160-140	0.25	0.091667	0.214815	0.542857	0.113386	0.079587	0.444444		0.008046	0.546667		0.016667	0.030303		0.210884	0.178723	0.109091	0.333333		0.033333	0	0.119048	0.4	0.054054	0.144444	0.063374	0.096774	0.059459		0.323077	0.128205	0.118519	0.227027		0.177778		0.311828	0.325		1	0.868966	0.868966	0.017284	0.01	0.9	0.036207	0.738889		1
140-120	0.384615	0.177885	0.282051	0.461538	0.196245	0.116875	0.527066		0	0.230769		0	0.097902	0.030769	0.164835	0.515548	0.188811	0.711538		0.115385	0.021978	0.288462	0.444444	0.04158	0.192308	0.265907	0.186104	0.071726		0.35503	0.094675	0.153846	0.422037		0.102564		0.471464	0.432692		0.473373	0.482759	0.482759	0.017094	0.080769	0.75	0.02321	0.628205		0.769231
120-100	0.530303	0.357955	0.272727	0.506494	0.51539	0.103594	0.909091		0.010972	0.118182		0.181818	0.132231	0.181818	0.185529	0.60058	0.595041	0.886364		0.409091	0.038961	0.340909	0.717172	0.12285	0.356061	0.64422	0.369501	0.07371		0.524476	0.174825	0.212121	0.670762		0.393939		0.483871	0.835227		0	0.197492	0.197492	0.030303	0.077273	0.818182	0.257837	0.848485		0.818182
100-80	0.768519	0.402778	0.395062	0.619048	1	0.379845	0.802469		0.549808	0.077778		0.333333	0.323232	0.055556	0.385488	1	1	0.5		1	0.174603	0.674603	0.938272	0.525526	0.425926	0.547325	0.526882	0.135135		0.615385	0.299145	0.567901	0.630631		0.259259		0.537634	0.625		0	0.643678	0.643678	0.135802	0.15	1	0.576628	0.648148		0.333333
80-60	0.702381	0.625	0.47619	0.714286	0.92126	1	0.873016		1	0.228571		0.5	0.428571	0.157143	0.962099	0.861702	0.428571	0.428571		0.571429	0.183673	0.790816	1	0.579151	0.238095	1	0.815668	0.277992		0.725275	0.538462	0.634921	1		0.380952		0.552995	0.616071		0	1	1	0.285714	0.214286	0.214286	1	1		0.571429
60-40	0.8	0.74375	0.733333	0.8	0.510236	0.781395	1		0.362069	0.2		0.85	0.636364	0.42	1	0.861702	0.163636	0.8		1	0.657143	1	0.911111	1	0.25	0.587654	0.832258	0.502703		0.461538	0.707692	0.977778	0.756757		0.733333		1	0.6		0	0.675862	0.675862	0.577778	0.23	0	0.905172	0.583333		0.4
40-20	0.944444	1	0.814815	1	0.377953	0.705426	0.802469		0.683908	0.233333		0.75	0.636364	0.866667	0.85034	0.095745	0.090909	0.916667		0.333333	0.952381	0.952381	0.555556	0.720721	0.305556	0.489712	1	1		1	0.846154	0.703704	0.693694		0.777778		0.376344	1		0	0.885057	0.885057	1	0.566667	0	0.583333	0.194444		0.333333
20-0	1	0.6875	1	0.285714	0.212598	0.325581	0.185185		0.965517	1		1	1	1	0.816327	0.095745	0	1		1	1	0.892857	0.111111	0.540541	1	0.08642	0.870968	0.891892		0.923077	1	1	0.567568		1		0	0.375		0	0	0	1	1	0	0.301724	0.583333		0
[truncated: 110 more columns]

## Sheet: Figure 6I_Eps15
Ring	Eps15 (every column is 1 ROI)
160-140	0.115152	0.674074	0.653333	0.061972	0.335802	0.072222		0.70098	0.074576	0.054167	0.237037	0.358974	0.2	0.022222	1	0.391304	0.266909	0.376923	0.266667	0.736364	0.703061		1	0.275641	0.188889	0.851977	0.458824		0.762667	0.6	0.4	0.1	0.122222	0.401626		0.023899	0.000731	0.207692	0.172973	0.054386			0.023077	0	0.022222	0.019608		0.05614	0.008
140-120	0.202797	1	0.476923	0.078007	0.490028	0.048077		1	0.08605	0.134615	0.401709	0.538462	0.296703	0.102564	0.81448	0.301003	0.403846	0.230769	0.216783	0.472028	1		0.923077	0.251479	0.24359	1	0.61086		1	0	0.692308	0.230769	0.179487	1		0.095791	0.002109	0.224852	0.386694	0.157895			0.113166	0	0	0.045249		0.088057	0
120-100	0.31405	0.84624	0.818182	0.158771	0.558923	0.079545		0.434492	0.115562	0.255682	0.494949	0.93007	0.779221	0.181818	0.882353	0.177866	0.399351	0.241259	0.144628	0.371901	0.801948		0.363636	0.454545	0.348485	0.821263	0.601604		0.898182	0	0.818182	0.627273	0.333333	0.922395		0.409949	0.013462	0.283217	0.454545	0.27512			0.288462	0.045455	0.121212	0.156863		0.106459	0.065455
100-80	0.439394	0.962963	0.888889	0.29734	0.580247	0.097222		0.084967	0.19774	0.479167	0.808642	0.92735	1	0.814815	0.980392	1	0.630952	0.294872	0.212121	1	0.420068		0.555556	0.438034	0.567901	0.93032	1		0.635556	1	0.666667	0.866667	0.518519	0.775068		0.752621	0.054235	0.386752	0.528529	0.608187			0.394231	0.333333	0.333333	0.309368		0.157895	0.102222
80-60	0.626623	0.366843	1	0.438632	0.460317	0.333333		0.273109	0.428571	0.839286	0.857143	1	0.367347	0.904762	0.882353	0.782609	0.704082	0.543956	0.350649	0.75974	0.341108		0.857143	0.673077	0.65873	0.377724	0.869748		0.817143	0.642857	0.857143	0.6	0.785714	0.815331		0.913747	0.232698	0.618132	0.6139	0.864662			0.572802	0.678571	0.333333	0.689076		0.302632	0.291429
60-40	0.727273	0.417284	0.52	0.6	0.607407	0.916667		0.152941	0.874576	0.5875	0.566667	0.646154	0.428571	0.933333	0.705882	0.469565	0.964286	0.646154	0.554545	0.245455	0.397959		0.4	1	0.944444	0.528814	0.847059		0.416	0	0	0.72	0.966667	0.697561		0.796226	0.670201	0.853846	0.621622	0.947368			0.928846	0.8	1	0.611765		0.457895	0.632
40-20	0.795455	0.374486	0.4	0.915493	0.753086	1		0.446078	1	0.9375	0.648148	0.358974	0.714286	0.444444	0	0.130435	1	1	0.727273	0	0.464286		0	0.544872	1	0.220339	0.794118		0.173333	0	1	1	1	0.211382		1	1	0.730769	0.963964	1			1	1	0.444444	0.934641		0.565789	1
20-0	1	0	0.2	1	1	0.75		0.955882	0.610169	1	1	0.269231	0.428571	1	0	0	0.642857	0.115385	1	0.818182	0.331633		0	0.288462	0.944444	0	0.264706		0	0	0	0.3	0.833333	0.317073		0.867925	0.575868	1	1	0.921053			0.721154	0.5	0.333333	1		1	0.36
[truncated: 248 more columns]

## Sheet: Figure 6I_Itsn
Ring	Itsn (every column is 1 ROI)
160-140	0.273563	0.626667	0.522876	0.182857	0.225	0.403604	0.375	0.178431	0.146667		0.45	0.273684	1	1	1	1		0.151515		0.444444	0.622556	0.299645	0.099578	0.468421	0.071625	0.256357	0.133838	0.27572	0.507692	0.234014	0.24812	0.895385	0.148205	0.731111	0.7	0.098515		1	0.051852	0.666667		0.003333		0.003333	0.01098	0		0.02	0
140-120	0.278515	0.815385	0.580694	0.468132	0.315247	0.465696	0.605769	0.253394	0.210256		0.634615	1	0.910931	0.710059	0.865385	0.841346		0.27972		0.467415	0.869289	0.380524	0.14703	0.522267	0.133503	0.319588	0.187063	0.319088	0.63787	0.368917	0.316657	0.908876	0.173373	0.884615	0.767559	0.169078		0.314685	0.068376	0.796703		0.057692		0.011538	0.019005	0.004049		0.092308	0.002959
120-100	0.592476	0.854545	0.846702	0.896104	0.540584	0.515971	0.715909	0.486631	0.157576		0.909091	0.808612	0.69378	0.202298	0.340909	0.454545		0.227273		0.530303	0.971975	0.49323	0.225547	0.557416	0.222389	0.462043	0.274105	0.378227	1	0.491651	0.450103	0.902098	0.290909	0.984848	0.788538	0.29973		0.123967	0.262626	0.38961		0.211364		0.131818	0.104813	0.090909		0.081818	0.031469
100-80	0.670498	0.711111	0.991285	1	1	0.924925	1	0.640523	0.207407		1	0.304094	0.672515	0.018315	0	0.393519		0.555556		0.64429	1	0.762411	0.315049	0.678363	0.310376	0.596793	0.358586	0.482853	0.977778	0.548753	0.593985	0.953846	0.388889	0.907407	0.702899	0.468647		0.757576	0.555556	0.714286		0.222222		0.75	0.503268	0.327485		0.3	0.059829
80-60	1	0.742857	0.966387	0.857143	0.84949	1	0.5625	1	0.180952		0.642857	0.146617	0.300752	0.023548	0.535714	0.431548		0.811688		0.639881	0.747583	0.946049	0.562387	0.823308	0.558442	0.724595	0.46645	0.661376	0.991209	0.731778	0.739527	0.837363	0.515385	0.828571	0.940994	0.713932		0.681818	0.444444	0.969388		0.267857		1	1	0.541353		0.942857	0.131868
60-40	0.386207	0.68	1	0.668571	0.594643	0.681081	0.3375	0.658824	0.213333		0.15	0	0.763158	0.032967	0	0.5		1		1	0.586466	1	0.749367	0.926316	0.864463	0.865979	0.731818	0.802469	0.88	0.783673	0.803008	0.987692	0.733846	0.966667	0.808696	0.89703		0.136364	0.8	1		0.325		0.63	0.955294	0.842105		0.6	0.269231
40-20	0.16092	0.466667	0.882353	0.771429	0.5625	0.693694	0.375	0.617647	0.266667		0.25	0.114035	0.087719	0.082418	0	0.347222		0.151515		0.902778	0.421053	0.647163	0.814346	0.807018	0.909091	0.979381	0.767677	0.921811	0.451282	0.789116	1	1	0.723077	0.866667	1	1		0	0.62963	0		0.4		0.416667	0.54902	1		1	0.794872
20-0	0	1	0.588235	0.342857	0.080357	0	0	0.308824	1		0	0	0	0.082418	0	0.416667		0		0.868056	0.338346	0.824468	1	1	1	1	1	1	0.507692	1	0.890977	0.830769	1	1	0.978261	0.987624		0	1	0		1		0.45	0.658824	0.631579		0.9	1
[truncated: 80 more columns]

## Sheet: Figure 6I_Hip1R
Ring	Hip1R (every column is 1 ROI)
160-140	0.598551	0.183333	0.870833		0.373333		0.017722	0.306122	0.428571	0.184722		0.372549	0.943137		0.155556	0.100247	0.142387	0.913262	0.480392	0.104869	0.384615	0.109259	0.219753	0.04	0.241224	0.558108	0.172789	0.542579		0.355269	0.362168	0.097222	0.206061	0.228346	0.080893	0.217037	0.083333		0.112069	0.322258	0.16383	0.098282	0.161111		0.262411	0.190164		0.333333	1
140-120	0.76087	0.634615	0.951923		0.530769		0.024992	0.510204	0.483516	0.145833		0.361991	1	1	0.25641	0.291168	0.162393	1	0.644796	0.103717	0.650888	0.145299	0.279202	0.071795	0.306949	0.636694	0.235479	0.710275		0.472457	0.54672	0.095696	0.444056	0.358873	0.133569	0.265812	0.161172		0.176061	0.501629	0.316967	0.145916	0.221154		0.365521	0.288777		0.538462	0.544872
120-100	0.802372	1	1		0.509091		0.204066	0.491651	0.649351	0.344697		0.641711	0.938503	0.495601	0.30303	0.466667	0.236813	0.965787	0.467914	0.219612	0.734266	0.131313	0.282828	0.163636	0.565657	0.69656	0.369202	0.75647		0.636364	0.76715	0.13474	0.719008	0.510021	0.24534	0.378788	0.217532		0.244514	0.663311	0.674726	0.219306	0.270833		0.551257	0.412817		0.545455	0.776515
100-80	0.786232	0.916667	0.840278		0.688889		0.748242	0.396825	0.547619	0.826389		0.457516	0.424837	0.55914	0.222222	0.720165	0.282579	0.792115	0.800654	0.399501	0.555556	0.17284	0.218107	0.251852	0.766506	0.882883	0.707483	0.80292		0.928315	0.906612	0.216931	0.964646	0.71741	0.504417	0.517284	0.342593		0.416667	0.798046	0.937746	0.312715	0.490741		0.748621	0.464481		0.555556	0.601852
80-60	1	0.196429	0.491071		0.471429		1	0.539359	0.816327	1		0.672269	0.109244	0.299539	0.428571	1	0.495591	0.798771	0.819328	0.601926	0.659341	0.376984	0.338624	0.619048	1	1	0.527697	0.828989		1	1	0.430272	0.857143	0.807087	0.765093	0.577778	0.472789		0.565271	1	1	0.466863	0.53869		0.815603	0.740047		0.857143	0.297619
60-40	0.928261	0	0.825		0.36		0.980591	1	0.871429	0.991667		1	0.382353	0	0.933333	0.798519	0.775309	0.83871	1	1	1	0.644444	0.444444	0.56	0.940097	0.964865	0.497959	1		0.912258	0.893252	0.683333	1	1	1	0.808889	0.757143		0.752586	0.948534	0.86383	0.696907	0.658333		1	0.829508		1	0.25
40-20	0.963768	0	0.458333		0.566667		0.827004	0.782313	0.880952	0.777778		0.294118	0.127451	0.069892	0.666667	0.345679	1	0.419355	0.931373	0.805243	0.769231	1	0.567901	0.555556	0.924316	0.977477	0.503401	0.961071		0.933333	0.966258	0.849206	0.984848	0.93832	0.899582	0.959259	0.849206		1	0.714441	0.835697	0.996564	0.875		0.933806	0.896175		0.833333	0.069444
20-0	0.608696	0	0		1		0.443038	0.306122	1	0.729167		0.588235	0	0	1	0.725926	0.728395	0.419355	0.588235	0.786517	0.384615	0.833333	1	1	0.777778	0.709459	1	0.729927		0.993548	0.858896	1	0.909091	0.846457	0.951883	1	1		0.931034	0.433225	0.322695	1	1		0.992908	1		0	0
[truncated: 156 more columns]

## Sheet: Figure 6I_Dyn2
Ring	Dyn2 (every column is 1 ROI)
160-140	0.179048	0.897992	0.088	0.164706	0.385965	0.133333	0.753623	0.111111	0.730435	0.024339		0.516239	0.104762	0.535217	0.099087	0.940171	0.271654	0.43252	0.241767	0.14386	0.135837	0.120635	0.216162		0.017831	0.431285	0.174359	1		1	0.390476	0.20625	0.20625	0.255556	0.920083	0.694969	0.402778	0.636364	0.475	0.475	0.475309	0.527103	0.371429	0.450388	0.12381	0.459259	0.113333	0.335338
140-120	0.252747	1	0.153846	0.251131	0.425101	0	1	0	0.842809	0.023199		0.646943	0.163145	0.690569	0.152792	0.863511	0.396124	0.56848	0.339203	0.180451	0.257855	0.202076	0.27972		0.032623	0.50795	0.252465	0.785205		0.874126	0.412088	0.286058	0.286058	0.282051	0.893454	0.907112	0.408654	0.34965	0.490385	0.490385	0.605413	0.78289	0.545788	0.601073	0.211538	0.452991	0.215385	0.412955
120-100	0.349351	0.982475	0.283636	0.385027	0.430622	0.090909	0.976285	0	0.853755	0.051948		0.741259	0.237762	0.762198	0.231009	1	0.508948	0.5898	0.43483	0.259057	0.424242	0.286436	0.324151		0.056955	0.697816	0.365967	0.61429		0.557851	0.461039	0.392045	0.392045	0.363636	1	0.79331	0.681818	0.454545	0.511364	0.511364	0.909091	0.986406	0.65368	0.806554	0.357143	0.444444	0.233333	0.520848
100-80	0.455556	0.76573	0.37	0.401961	0.350877	0.111111	0.942029	0.185185	1	0.111111		0.854701	0.351648	0.812932	0.366058	0.890028	0.641732	0.701897	0.491299	0.347536	0.714484	0.462081	0.32211		0.13842	0.860335	0.509972	0.44196		0.909091	0.587302	0.628472	0.628472	0.388889	0.910973	0.786164	0.775463	0.30303	0.509259	0.509259	0.95679	1	0.804233	0.994832	0.615079	0.530864	0.444444	0.659148
80-60	0.602041	0.358003	0.467143	0.554622	0.300752	0.142857	0.565217	0.357143	0.614907	0.247166		0.908425	0.514914	1	0.513699	0.934799	0.742407	0.993031	0.585198	0.47261	1	0.636054	0.474747		0.224096	0.847566	0.538462	0.37654		0.714286	0.520408	0.607143	0.607143	0.412698	0.761313	0.916442	0.997024	0.779221	0.642857	0.642857	0.873016	0.744993	0.816327	1	0.545918	0.730159	0.704762	0.683136
60-40	0.622857	0.250602	0.668	0.582353	1	0	0.113043	1	0.391304	0.457143		0.8	0.683516	0.917514	0.757534	0.473846	0.838583	0.834146	0.742169	0.578947	0.944288	0.846032	0.581818		0.418795	0.871508	0.851282	0.268371		0.454545	0.685714	0.79375	0.79375	0.511111	0.792547	1	1	1	0.808333	0.808333	1	0.773832	0.933333	0.813953	0.814286	0.755556	0.926667	0.866165
40-20	0.495238	0.208835	0.92	1	0.526316	0	0	0.277778	0.391304	0.724868		0.940171	0.932234	0.843691	0.90411	0.451282	1	1	0.751004	0.822055	0.792384	1	0.811448		0.690763	1	1	0.207668		0.606061	1	1	1	0.685185	0.819876	0.613208	0.972222	0.454545	0.722222	0.722222	0.895062	0.64486	0.904762	0.406977	0.964286	1	0.977778	1
20-0	1	0	1	0.794118	0.526316	1	0.565217	0	0	1		1	1	0.79096	1	0.169231	0.92126	0.95122	1	1	0.701095	0.928571	1		1	0.653631	0.897436	0.28754		0.909091	0.5	0.75	0.75	1	0.819876	0.754717	0.520833	0.909091	1	1	0.648148	0.420561	1	0.488372	1	1	1	0.947368
[truncated: 120 more columns]
