# Supplementary material for: Dynamics and nanoscale organization of the postsynaptic endocytic zone at excitatory synapses
Source: eLife. 2022 Jan 24;11:e74387. doi: 10.7554/eLife.74387 (PMC8813055; doi:10.7554/eLife.74387)
Supplement: Figure 7—source data 1. [file elife-74387-fig7-data1.xlsx]

## Sheet: Figure 7D
% PSDs	Clathrin	Eps15	B2adaptin	Itsn	Hip1R	Dyn2	Cpg2
Neuron 1	0.678749	0.374508	1.02339	0.27689	0.834563	1.14741	0.723099
Neuron 2	0.593905	1.06111	0.230263	0.524634	0.690411	0.38247	0.52589
Neuron 3	0.551484	1.12353	0.654971	0.996805	0.986301	1.14741	0.894013
Neuron 4	0.840356	0.499344	0.581717	0.389377	1.08493	1.14741	0.823433
Neuron 5	0.561762	0.327485	0.553781	0.799423	0.72468	0.573705	1.13804
Neuron 6	0.973721	0.224705	0.798246	1.08493	0.877431	1.10151	1.09341
Neuron 7	0.590875	0.41393	0.409357	0.472623	0.852446	1.09277	0.995785
Neuron 8	0.194641	0.642014	0.477583	0.311502	0.90411	0.849934	0.746839
Neuron 9	0.250674	0.582568	0.429825	0.913738	0.986301	0.803187
Neuron 10	0.389282	0.642014	0.581717	0.958466	0.834563	1.09004
Neuron 11		0.481511		0.655793	0.813699

## Sheet: Figure 7F
Relative to control	Jasp	LatB	CK666	CLCb-mutant	Itsn-KD	AP2-mutant	shCPG2
Neuron 1	1.34475	0.672378	0.849319	1.01806	1.62845	1.06365	0.538336
Neuron 2	1.21028	0.990872	0.791033	1.45732	1.25348	1.33942	1.02773
Neuron 3	1.18338	0.924519	0.495436	1.14898	1.04686	1.38127	0.230715
Neuron 4	1.34475	0.448252	1.2032	0.861302	0.610668	0.851694	1.00938
Neuron 5		0.855753	1.34475	1.28091	1.24909	1.06735	1.06873
Neuron 6		0.717203	0.778543	0.77795	1.0992		0.8728
Neuron 7		0.768432	1.21028	1.03356	1.22134		1.03585
Neuron 8		1.12063	1.04592		0.499637		0.797989
Neuron 9			1.2032		0.572501		0.997486
Neuron 10			1.10025		0.999274		1.10382
Neuron 11			0.707766		0.732801		0.937887
Neuron 12			1.00857				1.07431
Neuron 13							1.48958
