# Supplementary material for: Dynamics and nanoscale organization of the postsynaptic endocytic zone at excitatory synapses
Source: eLife. 2022 Jan 24;11:e74387. doi: 10.7554/eLife.74387 (PMC8813055; doi:10.7554/eLife.74387)
Supplement: Figure 8—source data 1. [file elife-74387-fig8-data1.xlsx]

## Sheet: Figure 8B
	NMDA-LTD ( normalized to timepoint 0)						DHPG-LTD (normalized to timepoint 0)
	Ctrl = 0'	5'	10'	30'			Ctrl= 0'	5'	10'	30'
Neuron 1	0.614482	1.36862	1.07534	2.53022			0	2.16289	1.80241	0
Neuron 2	0.885576	0.935081	1.30911	0.47793			1.06024	4.50602	0	0.357143
Neuron 3	0.827187	1.30911	0.679164	1.14703			0.496192	2.70361	0	0.476
Neuron 4	1.67275	1.54715	2.02418	0.557883			1.46246	1.54371	2.31556	0
Neuron 5	0.689419	1.9994		1.38143			0.57889	3.08741	0	0
Neuron 6	1.05711	2.2279		1.03607			1.46246	2.52607	0	1
Neuron 7	1.17201	0.928291		1.14513			1.45058	1.45749	1.99707	2.625
Neuron 8	1.37884						0.946025	2.06699	0	2
Neuron 9	0.965186						0.852942	0	2.58082	3.85
Neuron 10	1.01115						0.72529	1.74899	1.52629	0.954545
Neuron 11	1.21191						1.03613	1.01053	0.631579	2.52632
Neuron 12	0.897707						0.989032		1.08271	0.344498
Neuron 13	0.942593						0.614481		1.56806	1.16599
Neuron 14							0.885577
Neuron 15							0.827187
Neuron 16							1.67275
Neuron 17							0
Neuron 18							0.473684
Neuron 19							2.52632

## Sheet: Figure 8C
	Control	5' DHPG	MPEP
	18.75	31.0345	19.3548
	12.9032	25	11.7647
	17.6471	28.5714	8.33333
	11.1111	16.6667	6.45161
	15	27.2727	16.6667
	14.2857	25	47.3684
	24	38.0952	20
	31.0345	40	4.87805
	11.4286	30.1887	22.5
	24.3243	23.8095	3.125
	16.6667	40
	0	23.8095
	0	25
	20
	16.6667
	21.875
	31.0345

## Sheet: Figure 8E
	Time (minutes)	Ratio PSDs containing multiple Ezs
		Neuron 1	Neuron 2	Neuron 3	Neuron 4	Neuron 5	Neuron 6	Neuron 7	Neuron 8	Neuron 9	Neuron 10	Neuron 11	Neuron 12	Neuron 13
	0	1.03873	0.869631	1.36975	0.721894	0.900489	1.23817	0.861338	1.14097	0.785182	1.07385
	5	0.741947	0.254778	0.692484	1.21836	0.949692	1.98108	0.874004	2.53674
	30	0.562318	1.25695	1.3991	2.13681	1.49262	0.468089	2.53548	2.2419
	45	1.55091	1.00163	0.296779	1.78067	0.73683	0.667752	2.47635	2.80653	0.27515	0.600326	2.02839	2.66226	1.73862
	60	0.485638	0.534202	2.18537	0.971276	1.38675	1.04267	1.6509	2.15334	3.80322	1.82555	1.14097
	90	1.68695	0.971276	1.0684	1.78067	0.763146	1.0684	1.29713	1.39691	2.60668	3.30179	0.234045	1.82555
	120'	1.44379	1.37366	0.861616	1.69973	0.433137	0.696785	1.72268	2.2012	2.66683	3.30179

## Sheet: Figure 8F
	Control				LTP				LTP+AP5
	0	1	>2		0	1	>2		0	1	>2
Neuron 1	48	40	12		8.69565	60.8696	30.4348		41.6667	29.1667	29.1667
Neuron 2	51.6129	48.3871	0		33.3333	51.8518	14.8148		48.3871	48.3871	3.22581
Neuron 3	12.1212	57.5758	27.2727		26.6667	56.6667	16.6667		33.3333	66.6667	0
Neuron 4	25	53.5714	21.4286		21.4286	42.8571	35.7143		33.3333	38.8889	27.7778
Neuron 5	27.2727	50	22.7273		3.84615	57.6923	38.4615		45.4545	45.4545	9.09091
Neuron 6	25	58.3333	16.6667		28.2051	41.0256	30.7692		23.5294	56.8627	19.6078
Neuron 7	32.5581	53.4884	13.9535		20	51.1111	28.8889		26.6667	51.1111	22.2222
Neuron 8	28.8889	44.4444	26.6667		50	18.75	31.25		33.3333	51.8518	14.8148
Neuron 9	45	37.5	17.5		35	47.5	17.5
Neuron 10					16.9491	44.0678	38.983
Neuron 11					28.3784	35.1351	36.4865

## Sheet: Figure 8H
	Time (minutes)	1>2				1>1
	0	0.823875	0.559687	1.61057	1.00587	1.14515	1.38939	0.964965	0.500501
	5	1.24657	0.72407	1.35812	1.09393	0.860861	1.49349	0.772773	0.696697
	30	1.33855	0.902153	1.64188	1.19374	1.04505	1.13714	0.708709	0.724725

## Sheet: Figure 8I
CLC area/ROI	Control	LTP
ROI 1	0.0330667	0.0347636
ROI 2	0.0386133	0.0272696
ROI 3	0.0764308	0.0417684
ROI 4	0.071552	0.0548414
ROI 5	0.0475636	0.109013
ROI 6	0.0632889	0.0471579
ROI 7		0.0501091
ROI 8		0.0351

## Sheet: Figure 8J
Relative intensity	Before	After
ROI1	109898	110033
ROI2	109898	107987
ROI3	108266	109089
ROI4	108755	109936
ROI5	111378	112847
ROI6	109627	109133
ROI7	111041	113452
ROI8	108610	108795
ROI9	109469	108744
ROI10	108778	108898
ROI11	109776	108751
ROI12	111192	110452
ROI13	108605	106622
ROI14	107629	107469
ROI15	109579	110750
ROI16	108640	107242
ROI17	111761	109741
ROI18	113556	108435
ROI19	109710	115311
ROI20	108522	107824
ROI21	112439	112418
ROI22	107547	107486
ROI23	108548	106771
ROI24	117824	114963
ROI25	109917	111898
ROI26	112585	108398
ROI27	110925	110579
ROI28	112213	112137
ROI29	112268	109050
ROI30	115596	113950
ROI31	109861	109644
